# Supplementary material for: Reported Outcome Measures in Degenerative Cervical Myelopathy: A Systematic Review
Source: PLoS One. 2016 Aug 2;11(8):e0157263. doi: 10.1371/journal.pone.0157263 (PMC4970758; doi:10.1371/journal.pone.0157263)
Supplement: S2 Table — Spreadsheet providing the initially shortlisted articles. (XLSX) [file pone.0157263.s002.xlsx]

## Sheet: Sheet1
Tag	AU	FA	IN	TI	SO	OI	AB	PT	DC	YR
1	Azimi P Rezaei O Montazeri A	Azimi, Parisa Rezaei, Omidvar Montazeri, Ali	Azimi,Parisa. Department of Neurosurgery, Shahid Beheshti University of Medical Sciences, Tehran, IR Iran. Rezaei,Omidvar. Department of Neurosurgery, Shahid Beheshti University of Medical Sciences, Tehran, IR Iran. Montazeri,Ali. Mental Health Research Group, Health Metrics Research Centre, Iranian Institute for Health Sciences Research, The Academic Center for Education, Culture and Research, T…	An outcome measure of functionality and quality of life in patients with cervical myelopathy.	Iranian Red Crescent Medical Journal. 16(6):e8102, 2014 Jun.	BACKGROUND: Cervical spondylotic myelopathy (CSM) is a common cause of significant clinical morbidity. The Japanese Orthopedic Association Cervical Myelopathy Evaluation Questionnaire (JOACMEQ) is a measure of health-related quality of life in these patients. OBJECTIVES: This study aimed to cross-culturally translate and validate the JOACMEQ in Iran. PATIENTS AND METHODS: This study was a prospec…	Journal Article	20140728	2014	Source: NLM. PMC4102997
2	Kimura A Endo T Inoue H Seichi A	Kimura, Atsushi Endo, Teruaki Inoue, Hirokazu Seichi, Atsushi	Kimura,Atsushi. Department of Orthopaedics, Jichi Medical University, Shimotsuke, Tochigi, Japan. Endo,Teruaki. Department of Orthopaedics, Jichi Medical University, Shimotsuke, Tochigi, Japan. Inoue,Hirokazu. Department of Orthopaedics, Jichi Medical University, Shimotsuke, Tochigi, Japan. Seichi,Atsushi. Department of Orthopaedics, Jichi Medical University, Shimotsuke, Tochigi, Japan.	Preoperative predictors of patient satisfaction with outcome after cervical laminoplasty.	Global Spine Journal. 4(2):77-82, 2014 Jun.	Study design Prospective cohort study. Objective The purpose of the present study was to identify the predictors of patient satisfaction with outcome after cervical laminoplasty for compressive cervical myelopathy. Methods A cohort of 143 patients with compressive myelopathy who underwent cervical double-door laminoplasty between 2008 and 2011 was studied prospectively. The principal outcome was …	Journal Article	20140729	2014	Source: NLM. PMC4078151
3	Mashhadinezhad H Samini F Zare R	Mashhadinezhad, Hosein Samini, Fariborz Zare, Reza	Mashhadinezhad,Hosein. Hosein Mashhadinezhad MD, Fariborz Samini MD, Reza Zare MD, Department of Neurosurgery, Faculty of Medicine Trauma Research Center, Mashhad University of Medical Sciences, Mashhad, Iran. Samini,Fariborz. Hosein Mashhadinezhad MD, Fariborz Samini MD, Reza Zare MD, Department of Neurosurgery, Faculty of Medicine Trauma Research Center, Mashhad University of Medical Sciences, …	Comparison of outcomes and safety of using hydroxyapatite granules as a substitute for autograft in cervical cages for anterior cervical discectomy and interbody fusion.	Archives of Bone & Joint Surgery. 2(1):37-42, 2014 Mar.	BACKGROUND: After cervical discectomy, autogenic bone is packed into the cage to increase the rate of union between adjacent vertebral bodies, but donor site-related complications can still occur. In this study we evaluate the use of hydroxyapatite granules as a substitute for autograft for interbody fusion. METHODS: From November 2008 to November 2011, 236 patients participated in this study. Pe…	Journal Article	20140910	2014	Source: NLM. PMC4151434
4	Qian L Shao J Liu Z Cheng L Zeng Z Jia Y Li X Wang H	Qian, Lie Shao, Jiang Liu, Zude Cheng, Liming Zeng, Zhili Jia, Yongwei Li, Xinfeng Wang, Hantao		Comparison of the safety and efficacy of anterior 'skip' corpectomy versus posterior decompression in the treatment of cervical spondylotic myelopathy.	Journal of Orthopaedic Surgery. 9:63, 2014.	BACKGROUND: The aim of this study was to compare the therapeutic effects of anterior 'skip' corpectomy with posterior decompression for treating four-level cervical spondylotic myelopathy. METHODS: Operation time and blood loss during the operation for the anterior and posterior approach groups were recorded. Patients were examined with cervical lateral radiography before and after the operation …	Journal Article Research Support, Non-U.S. Gov't	20141007	2014	Source: NLM. PMC4182783
5	Kim SD Ha HG Lee CY Kim HW Jung CK Kim JH	Kim, Sung-Duk Ha, Ho-Gyun Lee, Cheol-Young Kim, Hyun-Woo Jung, Chul-Ku Kim, Jong Hyun	Kim,Sung-Duk. Department of Neurosurgery, Konyang University Hospital, Daejon, Koera. Ha,Ho-Gyun. Department of Neurosurgery, Konyang University Hospital, Daejon, Koera. ; Department of Neurosurgery, Teun Teun Hospital, Daejon, Korea. Lee,Cheol-Young. Department of Neurosurgery, Konyang University Hospital, Daejon, Koera. Kim,Hyun-Woo. Department of Neurosurgery, Konyang University Hospital, Daej…	Cervical cord decompression using extended anterior cervical foraminotomy technique.	Journal of Korean Neurosurgical Society. 56(2):114-20, 2014 Aug.	OBJECTIVE: At present, gold-standard technique of cervical cord decompression is surgical decompression and fusion. But, many complications related cervical fusion have been reported. We adopted an extended anterior cervical foraminotomy (EACF) technique to decompress the anterolateral portion of cervical cord and report clinical results and effectiveness of this procedure. METHODS: Fifty-three p…	Journal Article	20141020	2014	Source: NLM. PMC4200358
6	Yan N Yu S Hou T Gu G Zhang H Zhao S He S	Yan, Ning Yu, Shunzhi Hou, Tiesheng Gu, Guangfei Zhang, Hailong Zhao, Shan He, Shisheng	Yan,Ning. Department of Orthopedic Surgery, Shanghai 10th People's Hospital, Tongji University School of Medicine, Shanghai, China. Yu,Shunzhi. Department of Orthopedic Surgery, Shanghai 10th People's Hospital, Tongji University School of Medicine, Shanghai, China. Hou,Tiesheng. Department of Orthopedic Surgery, Shanghai 10th People's Hospital, Tongji University School of Medicine, Shanghai, Chin…	Cervical spondylotic myelopathy caused by single-level vertebral spontaneous fusion.	PLoS ONE [Electronic Resource]. 9(11):e112423, 2014.	PURPOSE: To evaluate the clinical features, imaging characteristics, surgical options, and clinical outcomes of patients with Cervical spondylotic myelopathy (CSM) caused by single-level vertebral spontaneous fusion (SLVSF). METHODS: Sixteen consecutive patients with SLVSF who underwent anterior surgery were included in this study and 38 patients with CSM caused by spinal degeneration were enroll…	Journal Article	20141108	2014	Source: NLM. PMC4224487
7	van Eck CF Regan C Donaldson WF Kang JD Lee JY	van Eck, Carola F Regan, Conor Donaldson, William F Kang, James D Lee, Joon Y	van Eck,Carola F. From the Department of Orthopaedic Surgery, University of Pittsburgh, Pittsburgh, PA.	The revision rate and occurrence of adjacent segment disease after anterior cervical discectomy and fusion: a study of 672 consecutive patients.	Spine. 39(26):2143-7, 2014 Dec 15.	STUDY DESIGN: LEVEL III: retrospective cohort study. OBJECTIVE: The aim of this study was to determine the rate of revision surgery and the occurrence of adjacent segment disease of patients undergoing ACDF for cervical radiculopathy and myelopathy using more modern-day instrumentation techniques. SUMMARY OF BACKGROUND DATA: Anterior cervical discectomy and fusion (ACDF) has long been the preferr…	Journal Article	20141216	2014
8	Kopjar B Tetreault L Kalsi-Ryan S Fehlings M	Kopjar, Branko Tetreault, Lindsay Kalsi-Ryan, Suhkvinder Fehlings, Michael	Kopjar,Branko. *Department of Health Services, University of Washington, Seattle, WA; and +Division of Neurosurgery, Toronto Western Hospital, University of Toronto, University Health Network, Toronto, Ontario, Canada.	Psychometric properties of the modified Japanese Orthopaedic Association scale in patients with cervical spondylotic myelopathy.	Spine. 40(1):E23-8, 2015 Jan 1.	STUDY DESIGN: Prospective study. OBJECTIVE: This study aims to determine the psychometric properties of the modified Japanese Orthopaedic Association (mJOA) scale. SUMMARY OF BACKGROUND DATA: Several outcome measures assess functional impairment and quality of life in patients with cervical myelopathy. However, a "gold standard" has not been established. One of the most widely accepted tools for …	Journal Article Research Support, Non-U.S. Gov't	20141220	2015
9	Bai CR Wang BQ Li KH Guo A Tang H	Bai, Cheng-Rui Wang, Bing-Qiang Li, Kang-Hua Guo, Ai Tang, Hai		Benefit of degenerative posterior longitudinal ligament removal during anterior decompression in cervical spondylotic myelopathy.	Orthopedics. 38(1):e54-61, 2015 Jan.	It remains controversial whether degenerative posterior longitudinal ligaments should be removed during anterior decompression procedures for cervical spondylotic myelopathy. Few data are available from studies that have compared removing and retaining the degenerative posterior longitudinal ligament. The goal of this retrospective study was to evaluate the benefit of degenerative posterior longi…	Journal Article	20150123	2015
10	Nouri A Tetreault L Zamorano JJ Dalzell K Davis AM Mikulis D Yee A Fehlings MG	Nouri, Aria Tetreault, Lindsay Zamorano, Juan J Dalzell, Kristian Davis, Aileen M Mikulis, David Yee, Albert Fehlings, Michael G	Nouri,Aria. *Division of Neurosurgery and Spine Program, Toronto Western Hospital, Toronto, Ontario, Canada +Toronto Western Research Institute, University Health Network, Toronto, Ontario, Canada ++Institute of Medical Science, University of Toronto, Toronto, Ontario, Canada Christchurch Public Hospital & Burwood Spinal Unit, Christchurch, New Zealand PDivision of Health Care and Outcomes Resear…	Role of magnetic resonance imaging in predicting surgical outcome in patients with cervical spondylotic myelopathy.	Spine. 40(3):171-8, 2015 Feb 1.	STUDY DESIGN: Ambispective, retrospective cohort study from prospectively collected data. SUMMARY OF BACKGROUND DATA: Cervical spondylotic myelopathy is the commonest cause of spinal cord impairment in the elderly population worldwide. Although magnetic resonance imaging (MRI) is the primary imaging modality for confirming the diagnosis, its role in predicting surgical outcome remains unclear. ME…	Journal Article Research Support, Non-U.S. Gov't	20150211	2015
11	Kommu R Sahu BP Purohit AK	Kommu, Rao Sahu, B P Purohit, A K	Kommu,Rao. Department of Neurosurgery, Nizam's Institute of Medical Sciences, Hyderabad, India. Sahu,B P. Department of Neurosurgery, Nizam's Institute of Medical Sciences, Hyderabad, India. Purohit,A K. Department of Neurosurgery, Nizam's Institute of Medical Sciences, Hyderabad, India.	Surgical outcome in patients with cervical ossified posterior longitudinal ligament: A single institutional experience.	Asian Journal of Neurosurgery. 9(4):196-202, 2014 Oct-Dec.	OBJECTIVE: Ossification of the posterior longitudinal ligament (OPLL) is a complex multi-factorial disease process having both metabolic and biomechanical factors. The role of surgical intervention as well as the choice of approach weather anterior or posterior is ambiguous. The objective of this study was to assess the surgical out come and post operative functional improvement in patients with …	Journal Article	20150216	2014	Source: NLM. PMC4323963
12	Khajavi K Shen A	Khajavi, Kaveh Shen, Alessandria	Khajavi,Kaveh. Georgia Spine and Neurosurgery Center. Shen,Alessandria. Georgia Spine and Neurosurgery Center.	Safety and efficacy of bioabsorbable cervical spacers and low-dose rhBMP-2 in multi-level ACDF.	International Journal of Spine Surgery. 8, 2014.	INTRODUCTION: Many options for interbody spacer and graft biologic exist for multilevel anterior cervical discectomy and fusion (ACDF). The objective of this study is to evaluate the safety and efficacy of a bioabsorbable cervical spacer (BCS) (Cornerstone HSR, Medtronic Sofamor Danek) filled with low-dose rhBMP-2 (INFUSE, Medtronic Sofamor Danek) in multilevel ACDF. METHODS: 72 consecutive patie…	Journal Article	20150219	2014	Source: NLM. PMC4325506
13	Ito K Yukawa Y Ito K Machino M Kanbara S Nakashima H Hida T Ishiguro N Imagama S Kato F	Ito, Kenyu Yukawa, Yasutsugu Ito, Keigo Machino, Masaaki Kanbara, Shunske Nakashima, Hiroaki Hida, Tetsuro Ishiguro, Naoki Imagama, Shiro Kato, Fumihiko	Ito,Kenyu. Department of Orthopaedic Surgery, Chubu Rosai Hospital, 1-10-6 Koumei Minato-ward, Nagoya-city, Aichi 444-8530, Japan; Department of Orthopaedic Surgery, Nagoya University Hospital, Graduate School of Medicine, 65 Tsurumai Showa-ward, Nagoya-city, Aichi 466-8550, Japan. Electronic address: kenyubankara@yahoo.co.jp. Yukawa,Yasutsugu. Department of Orthopaedic Surgery, Chubu Rosai Hospi…	Dynamic changes in the spinal cord cross-sectional area in patients with myelopathy due to cervical ossification of posterior longitudinal ligament.	Spine Journal: Official Journal of the North American Spine Society. 15(3):461-6, 2015 Mar 1.	BACKGROUND CONTEXT: Dynamic changes in the spinal cord cross-sectional area due to cervical ossification of the posterior longitudinal ligament (C-OPLL) are unknown, but dynamic multidetector-row computed tomography (MDCT) may be a useful tool. PURPOSE: The purpose of this study was to evaluate the influence of dynamic factors on the spinal cord in patients with C-OPLL using MDCT during flexion a…	Journal Article	20150223	2015
14	Lukasiewicz AM Basques BA Bohl DD Webb ML Samuel AM Grauer JN	Lukasiewicz, Adam M Basques, Bryce A Bohl, Daniel D Webb, Matthew L Samuel, Andre M Grauer, Jonathan N	Lukasiewicz,Adam M. From the Department of Orthopaedics and Rehabilitation, Yale School of Medicine, New Haven, CT.	Myelopathy is associated with increased all-cause morbidity and mortality following anterior cervical discectomy and fusion: a study of 5256 patients in American College of Surgeons National Surgical Quality Improvement Program (ACS-NSQIP).	Spine. 40(7):443-9, 2015 Apr 1.	STUDY DESIGN: Retrospective cohort. OBJECTIVE: To evaluate whether myelopathy is associated with increased morbidity and mortality after anterior cervical discectomy and fusion (ACDF) compared with other indications for this procedure. SUMMARY OF BACKGROUND DATA: ACDF is the most common surgical procedure for the management of a spectrum of cervical spine pathologies. As a more advanced condition…	Journal Article	20150330	2015
15	Guan L Hai Y Yang JC Zhou LJ Chen XL	Guan, Li Hai, Yong Yang, Jin-Cai Zhou, Li-Jin Chen, Xiao-Long	Guan,Li. Department of Orthopedics, Beijing Chao-Yang Hospital, Capital Medical University, Gong Ti Nan Lu 8#, Chao-Yang District, Beijing, 100020, People's Republic of China. guanli403@163.com. Hai,Yong. Department of Orthopedics, Beijing Chao-Yang Hospital, Capital Medical University, Gong Ti Nan Lu 8#, Chao-Yang District, Beijing, 100020, People's Republic of China. yonghai_yh@163.com. Yang,Ji…	Anterior cervical discectomy and fusion may be more effective than anterior cervical corpectomy and fusion for the treatment of cervical spondylotic myelopathy.	BMC Musculoskeletal Disorders. 16:29, 2015.	BACKGROUND: This meta-analysis explored the efficacy and safety of anterior cervical corpectomy and fusion (ACCF) comparing to anterior cervical discectomy and fusion (ACDF) in treating cervical spondylotic myelopathy (CSM) patients. METHODS: Several electronic databases were searched combined with manually searching. Thirteen randomized controlled studies were enrolled with 1,062 CSM patients, i…	Journal Article	20150417	2015	Source: NLM. PMC4344784
16	Zhao D Wang S Passias PG Wang C	Zhao, Deng Wang, Shenglin Passias, Peter G Wang, Chao	Zhao,Deng. *Orthopaedic Department, Peking University Third Hospital, Beijing, China; ++Orthopaedic Department, Third People's Hospital of Chengdu/Second Affiliated Hospital of Chengdu, Chongqing Medical University, Chengdu, China; Division of Spinal Surgery, NYU Medical Center/Hospital for Joint Diseases, NYU School of Medicine, New York, New York.	Craniocervical instability in the setting of os odontoideum: assessment of cause, presentation, and surgical outcomes in a series of 279 cases.	Neurosurgery. 76(5):514-21, 2015 May.	BACKGROUND: Our clinical understanding of os odontoideum (OO) remains incomplete. Congenital and traumatic causes have been proposed and advocated. Clinical presentations range from asymptomatic to axial pain to myelopathy or vertebral-basilar ischemia. A consensus for surgical management exists for those found to have an unstable atlantoaxial complex or symptomatic cranial-vertebral junction com…	Journal Article	20150417	2015
17	Zhang Y Zhou F Sun Y	Zhang, Yilong Zhou, Feifei Sun, Yu	Zhang,Yilong. Department of Orthopedics, Peking University Third Hospital, Beijing, 100191, China. wyq601201@sina.com. Zhou,Feifei. Department of Orthopedics, Peking University Third Hospital, Beijing, 100191, China. orthozhou@163.com. Sun,Yu. Department of Orthopedics, Peking University Third Hospital, Beijing, 100191, China. sunyuor@vip.sina.com.	Assessment of health-related quality of life using the SF-36 in Chinese cervical spondylotic myelopathy patients after surgery and its consistency with neurological function assessment: a cohort study.	Health & Quality of Life Outcomes. 13:39, 2015.	BACKGROUND: We aimed to calculate the responsiveness and statistically prove the reliability of the Medical Outcomes Study Short Form Health Survey (SF-36) in a prospective cohort study. We investigated the profile of mid-term health-related quality of life (QOL) outcome assessments after surgery for cervical spondylotic myelopathy (CSM) and determined the consistency of the SF-36 assessments of …	Journal Article	20150419	2015	Source: NLM. PMC4380110
18	Wang L Wei F Liu S Wan Y Chen N Cui S Zhong R Huang Y	Wang, Le Wei, Fuxin Liu, Shaoyu Wan, Yong Chen, Ningning Cui, Shangbin Zhong, Rui Huang, Yangliang	Wang,Le. Department of Spine Surgery, The First Affiliated Hospital, Sun Yat-Sen University, Guangzhou, China.	Can Modified Kurokawa's Double-Door Laminoplasty Reduce the Incidence of Axial Symptoms at Long-term Follow-up?: A Prospective Study of 152 Patients With Cervical Spondylotic Myelopathy.	Journal of Spinal Disorders & Techniques. 28(4):E186-93, 2015 May.	STUDY DESIGN: A prospective cohort study. OBJECTIVE: The purpose of this study was to determine whether the modified procedure reduces long-term axial symptoms (AS) and to understand better why the AS occur. SUMMARY OF BACKGROUND DATA: Following Kurokawa's double-door laminoplasty, postoperative AS reduce the quality of life of patients with cervical spondylotic myelopathy. The etiology of AS rem…	Journal Article	20150423	2015
19	Hartig D Batke J Dea N Kelly A Fisher C Street J	Hartig, Dennis Batke, Juliet Dea, Nicolas Kelly, Adrienne Fisher, Charles Street, John	Hartig,Dennis. *Vancouver General Hospital, Combined Neurosurgical and Orthopaedic Spine Program, Vancouver, Canada +Department of Orthopaedics, Division of Spine, University of British Columbia, Vancouver, Canada; and ++Orthopaedic Department, Royal Brisbane Hospital, Brisbane, Queensland, Australia.	Adverse events in surgically treated cervical spondylopathic myelopathy: a prospective validated observational study.	Spine. 40(5):292-8, 2015 Mar 1.	STUDY DESIGN: Prospective observational study. OBJECTIVE: Using validated tools to accurately identify and quantify incidence of and risks for inpatient adverse events (AEs) associated with surgical management of cervical spondylopathic myelopathy (CSM) with the goal of assisting physicians and patients in decision making. To identify patient-/disease-/technique-specific, independent risk factors…	Journal Article	20150423	2015
20	Kim B Yoon do H Shin HC Kim KN Yi S Shin DA Ha Y	Kim, Byeongwoo Yoon, Do Heum Shin, Hyun Chul Kim, Keung Nyun Yi, Seong Shin, Dong Ah Ha, Yoon	Kim,Byeongwoo. Department of Neurosurgery, Spine and Spinal Cord Institute, Yonsei University College of Medicine, Severance Hospital, 134 Shinchon-dong Seodaemun-gu, Seoul 120-752, Korea. Yoon,Do Heum. Department of Neurosurgery, Spine and Spinal Cord Institute, Yonsei University College of Medicine, Severance Hospital, 134 Shinchon-dong Seodaemun-gu, Seoul 120-752, Korea. Shin,Hyun Chul. Depart…	Surgical outcome and prognostic factors of anterior decompression and fusion for cervical compressive myelopathy due to ossification of the posterior longitudinal ligament.	Spine Journal: Official Journal of the North American Spine Society. 15(5):875-84, 2015 May 1.	BACKGROUND CONTEXT: Anterior decompression and fusion (ADF) for ossification of the posterior longitudinal ligament (OPLL) is technically demanding and associated with complications. Although various factors affecting clinical outcome have been investigated in posterior decompression, prognostic factors of ADF remain unclear. PURPOSE: The purpose of the study was to identify surgical outcome and …	Journal Article	20150430	2015
21	Lee JC Lee SH Peters C Riew KD	Lee, Jae Chul Lee, Sang-Hun Peters, Colleen Riew, K Daniel	Lee,Jae Chul. *Department of Orthopaedic Surgery, Soonchunhyang University Seoul Hospital, Seoul, Republic of Korea +Department of Orthopedic Surgery, Kyung Hee University Hospital at Gangdong, Seoul, Republic of Korea; and ++Department of Orthopedic Surgery, Washington University School of Medicine, St. Louis, MO.	Adjacent segment pathology requiring reoperation after anterior cervical arthrodesis: the influence of smoking, sex, and number of operated levels.	Spine. 40(10):E571-7, 2015 May 15.	STUDY DESIGN: A retrospective study. OBJECTIVE: The purpose of this study was to determine, using survivorship analysis, the rate of adjacent segment pathology (ASP) development and to identify the risk factors for reoperation. SUMMARY OF BACKGROUND DATA: The study of Hilibrand defined "adjacent segment disease" as symptomatic radiculopathy or myelopathy due to an adjacent segment documented on 2…	Journal Article Research Support, Non-U.S. Gov't	20150508	2015
22	Phillips FM Geisler FH Gilder KM Reah C Howell KM McAfee PC	Phillips, Frank M Geisler, Fred H Gilder, Kye M Reah, Christopher Howell, Kelli M McAfee, Paul C	Phillips,Frank M. *Midwest Orthopaedics at Rush University Medical Center, Chicago, IL +Chicago Back Institute, Chicago, IL ++Kye Gilder Consulting, LLC, San Diego, CA NuVasive, Inc., San Diego, CA; and PUniversity of Maryland St. Joseph Medical Center, Baltimore, MD.	Long-term Outcomes of the US FDA IDE Prospective, Randomized Controlled Clinical Trial Comparing PCM Cervical Disc Arthroplasty With Anterior Cervical Discectomy and Fusion.	Spine. 40(10):674-83, 2015 May 15.	STUDY DESIGN: Prospective, multicenter, randomized clinical trial. OBJECTIVE: To evaluate the long-term safety and effectiveness of the PCM Cervical Disc compared with anterior cervical discectomy and fusion (ACDF) in treatment of patients with symptomatic single-level degenerative spondylosis between C3-C4 and C7-T1 with or without prior cervical fusion. SUMMARY OF BACKGROUND DATA: The 2-year re…	Journal Article Research Support, Non-U.S. Gov't	20150509	2015
23	Xie Y Li H Yuan J Fu L Yang J Zhang P	Xie, Youzhuan Li, Hua Yuan, Junjie Fu, Lingjie Yang, Jianwei Zhang, Pu	Xie,Youzhuan. Shanghai Key Laboratory of Orthopaedic Implant, Department of Orthopaedic Surgery, Ninth People's Hospital, Shanghai Jiaotong University School of Medicine, Shanghai, 200011, People's Republic of China.	A prospective randomized comparison of PEEK cage containing calcium sulphate or demineralized bone matrix with autograft in anterior cervical interbody fusion.	International Orthopaedics. 39(6):1129-36, 2015 Jun.	PURPOSE: A variety of bone substitutes have been successfully used to fill PEEK cages in cervical interbody fusion in order to avoid the complications related to bone harvesting from the donor site. However, no controlled study has previously been conducted to compare the effectiveness of PEEK interbody cages containing calcium sulphate/ demineralized bone matrix (CS/DBM) with autogenous cancello…	Journal Article Research Support, Non-U.S. Gov't	20150606	2015
24	Yeh KT Lee RP Chen IH Yu TC Peng CH Liu KL Wang JH Wu WT	Yeh, Kuang-Ting Lee, Ru-Ping Chen, Ing-Ho Yu, Tzai-Chiu Peng, Cheng-Huan Liu, Kuan-Lin Wang, Jen-Hung Wu, Wen-Tien	Yeh,Kuang-Ting. Institute of Medical Sciences, Tzu Chi University, Hualien, Taiwan, ROC; Department of Orthopedics, Hualien Tzu Chi Hospital, Buddhist Tzu Chi Medical Foundation, Hualien, Taiwan, ROC. Lee,Ru-Ping. Institute of Medical Sciences, Tzu Chi University, Hualien, Taiwan, ROC. Chen,Ing-Ho. Department of Orthopedics, Hualien Tzu Chi Hospital, Buddhist Tzu Chi Medical Foundation, Hualien, …	Laminoplasty with adjunct anterior short segment fusion for multilevel cervical myelopathy associated with local kyphosis.	Journal of the Chinese Medical Association: JCMA. 78(6):364-9, 2015 Jun.	BACKGROUND: When treating patients who have multilevel cervical spondylotic myelopathy (MCSM) with short-segment kyphosis, instability, or major anterior foci, long-level anterior decompression with fusion is often a standard method but can cause obvious loss of range of motion and usually needs further posterior stabilization. For MCSM with correctable kyphosis or simple instability, laminectomy…	Journal Article	20150613	2015
25	Tomii M Mizuno J Itoh Y Watanabe K	Tomii, Masato Mizuno, Junichi Itoh, Yasunobu Watanabe, Kazuo	Tomii,Masato. Department of Neurosurgery, Southern TOHOKU General Hospital, Iwanuma, Miyagi, Japan. Electronic address: masatotomii@ybb.ne.jp. Mizuno,Junichi. Department of Neurosurgery, Southern TOHOKU General Hospital, Iwanuma, Miyagi, Japan. Itoh,Yasunobu. Department of Neurosurgery, Southern TOHOKU Research Institute for Neuroscience, Southern TOHOKU General Hospital, Koriyama, Fukushima, Jap…	Clinical study of C3-C4 level surgical cases of cervical spondylosis.	Clinical Neurology & Neurosurgery. 135:11-4, 2015 Aug.	OBJECTIVE: The purpose of this study was to elucidate the pathological characteristics of C3-C4 cervical spondylotic myelopathy (CSM). METHODS: Single-level anterior cervical discectomy and fusion (ACDF) was performed at C3-C4 in 53 patients (38 men, 15 women). The mean duration of preoperative symptoms was 6.0 months. Fifty-three non C3-C4 ACDF patients of our random sample of ACDF patients were…	Journal Article	20150616	2015
26	Nouri A Tetreault L Cote P Zamorano JJ Dalzell K Fehlings MG	Nouri, Aria Tetreault, Lindsay Cote, Pierre Zamorano, Juan J Dalzell, Kristian Fehlings, Michael G	Nouri,Aria. *Division of Neurosurgery and Spine Program, Toronto Western Hospital, Toronto, Ontario, Canada; +Toronto Western Research Institute, University Health Network, Toronto, Canada; ++Institute of Medical Science, University of Toronto, Toronto, Ontario, Canada; Faculty of Health Sciences, University of Ontario Institute of Technology (UOIT), Director, UOIT-CMCC Centre for the Study of Di…	Does Magnetic Resonance Imaging Improve the Predictive Performance of a Validated Clinical Prediction Rule Developed to Evaluate Surgical Outcome in Patients With Degenerative Cervical Myelopathy?.	Spine. 40(14):1092-100, 2015 Jul 15.	STUDY DESIGN: Ambispective study. OBJECTIVE: To determine whether MRI parameters improve the predictive performance of a validated clinical prediction rule used to assess functional outcomes in surgical patients with DCM. SUMMARY OF BACKGROUND DATA: Degenerative cervical myelopathy (DCM) is the most common cause of spinal cord dysfunction in the elderly worldwide. A clinical prediction rule was d…	Journal Article	20150714	2015
27	Vasquez-Castellanos RA Chotai S Wick J Stonko DP Cheng JS Devin CJ Asher AL McGirt MJ	Vasquez-Castellanos, Raul A Chotai, Silky Wick, Joseph Stonko, David P Cheng, Joseph S Devin, Clinton J Asher, Anthony L McGirt, Matthew J		109 The Profile of a Smoker and Its Impact on Outcomes After Cervical Spine Surgery.	Neurosurgery. 62 Suppl 1:199-200, 2015 Aug.	INTRODUCTION: Smoking has been associated with worse self-reported outcomes in patients undergoing degenerative lumbar spine surgery. Current focus is on decreasing cost and complications while improving outcomes. This potentially can be accomplished by acting on modifiable preoperative patient characteristics such as smoking. However, the impact of smoking on outcomes following degenerative cerv…	Journal Article	20150718	2015
28	Tanenbaum JE Lubelski D Rosenbaum BP Benzel EC Mroz T	Tanenbaum, Joseph E Lubelski, Daniel Rosenbaum, Benjamin P Benzel, Edward C Mroz, Thomas		118 Propensity Matched Analysis of Outcomes and Hospital Charges for Anterior vs Posterior Cervical Fusion for Cervical Spondylotic Myelopathy.	Neurosurgery. 62 Suppl 1:203, 2015 Aug.	INTRODUCTION: Anterior cervical fusion (ACF) and posterior cervical fusion (PCF) are 2 common surgical treatments for cervical spondylotic myelopathy (CSM). It is unclear whether ACF or PCF is superior with regard to charges or outcomes for the treatment of CSM. The goal of the present study is to help guide clinical decision making when choosing between ACF and PCF in treating CSM. METHODS: We u…	Journal Article	20150718	2015
29	Li ZQ Zhao YP Jia WY Wang X Chen B Shahbaz M Nie L Cheng L	Li, Ze-Qun Zhao, Yun-Peng Jia, Wen-Yu Wang, Xia Chen, Bin Shahbaz, Muhammad Nie, Lin Cheng, Lei	Li,Ze-Qun. Department of Spine Surgery, Qilu Hospital of Shandong University, Jinan, Shandong Province, P. R. China; Department of General Surgery, Qilu Hospital of Shandong University, Jinan, Shandong Province, P. R. China. Zhao,Yun-Peng. Department of Spine Surgery, Qilu Hospital of Shandong University, Jinan, Shandong Province, P. R. China. Jia,Wen-Yu. Department of Endocrinology and Metabolis…	Surgical Treatment of Cervical Spondylotic Myelopathy Associated Hypertension-A Retrospective Study of 309 Patients.	PLoS ONE [Electronic Resource]. 10(7):e0133828, 2015.	Hypertension is the most prevalent cardiovascular disease, and various risk factors are known to be involved in it. Cervical spondylotic myelopathy (CSM) is the most common non-traumatic cause of myelopathy, which displays neurological symptoms and may induce systemic symptoms. To date, it is still unknown whether CSM is associated with hypertension, and if so, whether the decompression operation…	Journal Article	20150721	2015	Source: NLM. PMC4508105
30	Li Z Xue Y He D Tang Y Ding H Wang Y Zong Y Zhao Y	Li, Zhiyang Xue, Yuan He, Dong Tang, Yanming Ding, Huairong Wang, Yi Zong, Yaqi Zhao, Ying	Li,Zhiyang. Department of Orthopedics, Tianjin Medical University General Hospital, 154 Anshan Road, Heping District, Tianjin, 300052, China.	Extensive laminectomy for multilevel cervical stenosis with ligamentum flavum hypertrophy: more than 10 years follow-up.	European Spine Journal. 24(8):1605-12, 2015 Aug.	PURPOSE: The aim of this research was to evaluate the long-term results of extensive laminectomy for the treatment of cervical spondylotic myelopathy due to multilevel cervical stenosis (MCS) with ligamentum flavum hypertrophy (LFH). METHODS: From January 2000 to December 2002, a total of 91 patients who underwent extensive laminectomy for MCS with LFH were included in this study to investigate t…	Journal Article	20150723	2015
31	Luo J Cao K Huang S Li L Yu T Cao C Zhong R Gong M Zhou Z Zou X	Luo, Jiaquan Cao, Kai Huang, Sheng Li, Liangping Yu, Ting Cao, Cong Zhong, Rui Gong, Ming Zhou, Zhiyu Zou, Xuenong	Luo,Jiaquan. Department of Spine Surgery/Orthopaedic Research Institute, The First Affiliated Hospital of Sun Yat-sen University, Guangzhou, 510080, People's Republic of China, luojiaquan666@163.com.	Comparison of anterior approach versus posterior approach for the treatment of multilevel cervical spondylotic myelopathy.	European Spine Journal. 24(8):1621-30, 2015 Aug.	PURPOSE: The purpose of this study is to evaluate the clinical outcomes, complications, and surgical trauma between anterior and posterior approaches for the treatment of multilevel cervical spondylotic myelopathy (CSM). STUDY DESIGN: Systematic review and meta-analysis. METHODS: Randomized controlled trials or non-randomized controlled trials published up to November 2014 that compared the clini…	Journal Article	20150723	2015
32	Nouri A Tetreault L Zamorano JJ Mohanty CB Fehlings MG	Nouri, Aria Tetreault, Lindsay Zamorano, Juan J Mohanty, Chandan B Fehlings, Michael G	Nouri,Aria. Division of Neurosurgery and Spine Program, Toronto Western Hospital, Toronto, Ontario, Canada ; Toronto Western Research Institute, University Health Network, Toronto, Ontario, Canada ; Institute of Medical Science, University of Toronto, Toronto, Ontario, Canada. Tetreault,Lindsay. Division of Neurosurgery and Spine Program, Toronto Western Hospital, Toronto, Ontario, Canada ; Toron…	Prevalence of Klippel-Feil Syndrome in a Surgical Series of Patients with Cervical Spondylotic Myelopathy: Analysis of the Prospective, Multicenter AOSpine North America Study.	Global Spine Journal. 5(4):294-9, 2015 Aug.	Study Design Prospective study. Objective To evaluate the prevalence of Klippel-Feil syndrome (KFS) in a prospective data set of patients undergoing surgical treatment for cervical spondylotic myelopathy (CSM) and to evaluate if magnetic resonance imaging (MRI) features in patients with KFS are more pronounced than those of non-KFS patients with CSM. Methods A retrospective analysis of baseline M…	Journal Article	20150730	2015	Source: NLM. PMC4516751
33	Jeyamohan SB Kenning TJ Petronis KA Feustel PJ Drazin D DiRisio DJ	Jeyamohan, Shiveindra B Kenning, Tyler J Petronis, Karen A Feustel, Paul J Drazin, Doniel DiRisio, Darryl J	Jeyamohan,Shiveindra B. Department of Neurosurgery, Albany Medical College, Albany, New York. Kenning,Tyler J. Department of Neurosurgery, Albany Medical College, Albany, New York. Petronis,Karen A. Department of Neurosurgery, Albany Medical College, Albany, New York. Feustel,Paul J. Department of Neurosurgery, Albany Medical College, Albany, New York. Drazin,Doniel. Department of Neurosurgery, A…	Effect of steroid use in anterior cervical discectomy and fusion: a randomized controlled trial.	Journal of Neurosurgery Spine. 23(2):137-43, 2015 Aug.	OBJECT Anterior cervical discectomy and fusion (ACDF) is an effective procedure for the treatment of cervical radiculopathy and/or myelopathy; however, postoperative dysphagia is a significant concern. Dexamethasone, although potentially protective against perioperative dysphagia and airway compromise, could inhibit fusion, a generally proinflammatory process. The authors conducted a prospective,…	Journal Article	20150803	2015
34	Lemcke J Al-Zain F Meier U Suess O	Lemcke, Johannes Al-Zain, Ferass Meier, Ullrich Suess, Olaf	Lemcke,Johannes. Department of Neurosurgery, Unfallkrankenhaus Berlin, Germany.	Polyetheretherketone (PEEK) Spacers for Anterior Cervical Fusion: A Retrospective Comparative Effectiveness Clinical Trial.	The open orthopaedics journal. 5:348-53, 2011.	Source: NLM. PMC3195819	BACKGROUND: Anterior cervical decompression and fusion (ACDF) is the standard surgical treatment for radiculopathy and myelopathy. Polyetheretherketone (PEEK) has an elasticity similar to bone and thus appears well suited for use as the implant in ACDF procedures. The aim of this study is to examine the clinical and radiographic outcome of patients treated with standing alone PEEK spacers without…	Journal Article	20111021	2011
35	Sherief T White J Bommireddy R Klezl Z	Sherief, T White, J Bommireddy, R Klezl, Z	Sherief,T. The Department of Trauma and Orthopaedic surgery, Royal Derby Hospital, UK.	Cervical spondylotic myelopathy: the outcome and potential complications of surgical treatment.		Acta Chirurgiae Orthopaedicae et Traumatologiae Cechoslovaca. 80(5):328-34, 2013.	PURPOSE OF THE STUDY: Cervical spondylotic myelopathy is the most common cause of spinal cord dysfunction in patients over 60 years old. Symptoms often develop gradually and insidiously and are characterized by neck stiffness, arm pain, numbness and clumsiness of hands, as well as weakness of the hands and legs frequently leading to a change in mobility. Surgery is performed primarily to prevent …	Journal Article	20140809	2013
36	Baba H. Maezawa Y. Furusawa N. Imura S. Tomita K.		(Baba, Maezawa, Furusawa, Imura, Tomita) Department of Orthopaedic Surgery, Fukui Medical School, Shimoaizuki 23, Matsuoka, Fukui 910-11, Japan	Flexibility and alignment of the cervical spine after laminoplasty for spondylotic myelopathy. A radiographic study.		International Orthopaedics. 19 (2) (pp 116-121), 1995. Date of Publication: 1995.	The long term effects of laminoplasty on cervical movement and alignment were investigated by radiography and CT scans in a study of 56 patients with multisegmental myelopathy who had undergone a C3 to C7 open-door laminoplasty. Follow up averaged 5.8 years. Satisfactory neurological improvement occurred in 73%. Cervical flexion decreased by 35% and extension by 57%; the decrease of both movement…	Journal: Article		1995
37	Tsuzuki N. Abe R. Saiki K. Iizuka T.		(Tsuzuki, Abe, Saiki, Iizuka) Department of Orthopaedic Surgery, Saitama Medical Center, Saitama Medical School, 1981 Tsujido-cho, Kamodo, Kawagoe, Saitama 350, Japan	Tension-band laminoplasty of the cervical spine.		International Orthopaedics. 20 (5) (pp 275-284), 1996. Date of Publication: 1996.	A new laminoplasty of the cervical spine has been developed using preserved ligaments as a tension-band. The laminae were enlarged in an open-door fashion and spacers inserted to maintain the spinolaminoligamentous complex intact. The stretched ligaments exerted a tension-band effect on the spacers and stabilised them so that neck movements could be started as soon as bleeding stopped. The spacer…	Journal: Article		1996
38	Inoue H. Ohmori K. Ishida Y. Suzuki K. Takatsu T.		(Inoue, Ohmori, Ishida, Suzuki, Takatsu) Dept. of Orthoped. and Spin. Surgery, Nagoya Daini Red Cross Hospital, Nagoya, Japan (Inoue) Dept. of Orthoped. and Spin. Surgery, Nagoya Daini Red Cross Hospital, 2-9 Myoken-cho, Showa-ku, Nagoya 466, Japan	Long-term follow-up review of suspension laminotomy for cervical compression myelopathy.		Journal of Neurosurgery. 85 (5) (pp 817-823), 1996. Date of Publication: November 1996.	This study compared the long-term outcome of cervical spondylitic myelopathy (CSM) with that of the ossification of the posterior longitudinal ligament of the cervical spine (OPLL) after suspension laminotomy, which was developed in the author's clinic. Seventy-six patients who received follow- up care for more than 5 years were available for analysis. The duration of the follow-up period average…	Journal: Article		1996
39	Nagata K. Ohashi T. Abe J. Morita M. Inoue A.		(Nagata, Ohashi, Abe, Morita, Inoue) Department of Orthopaedic Surgery, Kurume University, School of Medicine, Kurume, Japan (Nagata) Department of Orthopaedic Surgery, Kurume University Hospital, Asahi machi 67, 830 Kurume, Japan	Cervical myelopathy in elderly patients: Clinical results and MRI findings before and after decompression surgery.		Spinal Cord. 34 (4) (pp 220-226), 1996. Date of Publication: 1996.	We examined 173 patients with cervical myelopathy of various casuses. Seventy-seven patients underwent anterior decompression and fusion at not more than two levels, while 96 underwent posterior decompression by an expansive laminoplasty. Patients were followed up for between one and 4 1/2 years and the outcome was assessed both from a functional and a radiological point of view. The functional a…	Journal: Article		1996
40	Razack N. Greenberg J. Green B.A.		(Razack, Green) Department of Neurological Surgery, Univ. of Miami School of Medicine, FL, United States (Greenberg) Orlando Regional Medical Center, FL, United States (Greenberg) Department of Neurological Surgery, Orlando Regional Medical Center, Orlando, FL 32806, United States	Surgery for cervical myelopathy in geriatric patients.		Spinal Cord. 36 (9) (pp 629-632), 1998. Date of Publication: 1998.	Objective. The number of geriatric patients seeking surgical treatment for cervical myelopathy is steadily increasing. Although anecdotal experiences have been good, insufficient data exists in the spine literature concerning this particular group. We decided to review our experience to determine efficacy of surgical management and examine our morbidity with this select group. Methods. We underto…	Journal: Article		1998
41	Fujimura Y. Nishi Y. Chiba K. Nakamura M. Hirabayashi K.		(Fujimura, Nishi, Chiba, Nakamura, Hirabayashi) Department of Orthopaedic Surgery, School of Medicine, Keio University, 35 Shinanomachi, Shinjuku-ku, Tokyo 160, Japan	Multiple regression analysis of the factors influencing the results of expansive open-door laminoplasty for cervical myelopathy due to ossification of the posterior longitudinal ligament.		Archives of Orthopaedic and Trauma Surgery. 117 (8) (pp 471-474), 1998. Date of Publication: October 1998.	We conducted a multiple regression analysis on the surgical results (minimum follow-up of 5 years) of 55 patients who underwent expansive open-door laminoplasty (open-door ELAP) for cervical myelopathy due to ossification of the posterior longitudinal ligament (OPLL) in order to determine statistically the impact of factors influencing the results. Duration of myelopathy was found to be a signifi…	Journal: Article		1998
42	Maurice-Williams R.S. Elsmore A.		(Maurice-Williams, Elsmore) Royal Free Hospital, School of Medicine, London, United Kingdom (Maurice-Williams) Neurosurgical Unit, Royal Free Hospital, London NW3 2QG, United Kingdom	Extended anterior cervical decompression without fusion: A long-term follow-up study.		British Journal of Neurosurgery. 13 (5) (pp 474-479), 1999. Date of Publication: 1999.	We report the long-term outcome in 80 patients who had undergone extended anterior cervical decompression without fusion for cervical nerve root or spinal cord compression. Follow-up ranged from 2 years 4 months to 13 years. Five patients had died from causes unrelated to the original pathology or the surgery. Of the remaining 75 patients, 66 (88%) were symptom free or clearly improved, eight (10…	Journal: Article		1999
43	Al-Hami S.		(Al-Hami) Dept. of Neurosurgery, City Clinic Hospital Fulda, Pacelliallee 4, D-36043 Fulda, Germany	Cervical monosegmental interbody fusion using titanium implants in degenerative, intervertebral disc disease.		Minimally Invasive Neurosurgery. 42 (1) (pp 10-17), 1999. Date of Publication: March 1999.	Over a period of 12 months at the Klinik fur Neuro-chirurgie (belonging to the Stadtischen Klinikums Fulda) 54 patients were operated upon after presenting with cervical radiculopathy or myelopathy in single vertebral segments with intravertebral disc involvement and/or osteochondrosis. The surgical intervention of all patients was carried out microsurgically by the author using a vental approach…	Journal: Article		1999
44	Bednarik J. Kadanka Z. Vohanka S. Stejskal L. Vlach O. Schroder R.		(Bednarik, Kadanka, Vohanka) Department of Neurology, Faculty Hospital, Brno, Czech Republic (Stejskal) Department of Neurosurgery, Central Military Hospital, Prague, Czech Republic (Vlach) Department of Orthopaedic Surgery, Faculty Hospital, Brno, Czech Republic (Schroder) Department of Neurosurgery, Faculty Hospital, Brno, Czech Republic (Bednarik) Department of Neurology, Faculty Hospital Brno…	The value of somatosensory- and motor-evoked potentials in predicting and monitoring the effect of therapy in spondylotic cervical myelopathy: Prospective randomized study.		Spine. 24 (15) (pp 1593-1598), 1999. Date of Publication: 01 Aug 1999.	Study Design. A 2-year follow-up prospective randomized electrophysiologic and clinical study of patients with spondylotic cervical myelopathy. Objective. To assess the value of somatosensory- and motor- evoked potentials in the evaluation and prediction of the effect of therapy. Summary of Background Data. Previous studies have yielded conflicting data concerning the correlation between the chan…	Journal: Article		1999
45	Sampath P. Bendebba M. Davis J.D. Ducker T.		(Sampath, Bendebba, Davis, Ducker) Hunterian Neurosurgical Laboratory, Johns Hopkins School of Medicine, Hunterian 817, Baltimore, MD 21205, United States	Outcome in patients with cervical radiculopathy: Prospective, multicenter study with independent clinical review.		Spine. 24 (6) (pp 591-597), 1999. Date of Publication: 15 Mar 1999.	Study Design. The Cervical Spine Research Society study is a prospective, nonrandomized, multicenter investigation of patients with cervical spondylosis and disc disease. In this analysis, only patients who had radiculopathy without myelopathy as the predominant symptom were considered. Objectives. To determine demographics, surgeon treatment practices, and outcomes in patients with symptomatic r…	Journal: Article		1999
46	Shin J.J. Jin B.H. Kim K.S. Cho Y.E. Cho W.H.		(Jin, Kim, Cho) Department of Neurosurgery, Spine and Spinal Cord Institute, Gangnam Severance Spine Hospital, Yonsei University College of Medicine, 146-92, Dogok-Dong, Kangnam-gu, Kangnam PO Box 1217, Seoul 135-720, South Korea (Cho) Department of Radiology, Sanggye Paik Hospital, Inje University College of Medicine, Sanggye-7 dong, 761-1, Nowon-gu, Seoul 139-707, South Korea	Intramedullary high signal intensity and neurological status as prognostic factors in cervical spondylotic myelopathy.	Acta Neurochirurgica. 152 (10) (pp 1687-1694), 2010. Date of Publication: October 2010.		Purpose: The neurological outcome of cervical spondylotic myelopathy (CSM) may depend on multiple factors, including age, symptom duration, cord compression ratio, cervical curvature, canal stenosis, and factors related to magnetic resonance (MR) signal intensity (SI). Each factor may act independently or interactively with others. To clarify the factors in prognosis, we prospectively analyzed th…	Journal: Article		2010
47	Xiangshui M. Xiangjun C. Xiaoming Z. Qingshi Z. Yi C. Chuanqiang Q. Xiangxing M. Chuanfu L. Jinwen H.		(Xiangshui, Xiangjun, Xiaoming, Qingshi, Yi, Chuanqiang, Xiangxing, Chuanfu, Jinwen) Department of Radiology, Hospital of Shandong University, Qi Lu, China	3 T magnetic resonance diffusion tensor imaging and fibre tracking in cervical myelopathy.	Clinical Radiology. 65 (6) (pp 465-473), 2010. Date of Publication: June 2010.		Aim: To analyse the characterization of diffusion tensor imaging (DTI) with 3 T magnetic resonance imaging (MRI) in cervical myelopathy. Methods: A total of 21 healthy controls and 84 patients with cervical myelopathy underwent T2-weighted imaging and DTI. The patients were divided into four groups based on the degree of cord compression and MRI signal intensity of the compressed cord as seen on …	Journal: Article		2010
48	Chikuda H. Seichi A. Takeshita K. Shoda N. Ono T. Matsudaira K. Kawaguchi H. Nakamura K.		(Chikuda, Takeshita, Shoda, Ono, Matsudaira, Kawaguchi, Nakamura) Department of Orthopaedic Surgery, Faculty of Medicine, University of Tokyo, 7-3-1 Hongo, Bunkyo-ku, Tokyo 113-8655, Japan (Seichi) Department of Orthopaedics, Jichi Medical University, Tochigi, Japan	Correlation between pyramidal signs and the severity of cervical myelopathy.	European Spine Journal. 19 (10) (pp 1684-1689), 2010. Date of Publication: October 2010.		A retrospective study was performed to determine the sensitivities of the pyramidal signs in patients with cervical myelopathy, focusing on those with increased signal intensity (ISI) in T2-weighted magnetic resonance imaging (MRI). The relationship between prevalence of the pyramidal signs and the severity of myelopathy was investigated. We reviewed the records of 275 patients with cervical myel…	Journal: Article		2010
49	Minamide A. Yoshida M. Yamada H. Nakagawa Y. Maio K. Kawai M. Iwasaki H.		(Minamide, Yoshida, Yamada, Nakagawa, Maio, Kawai, Iwasaki) Department of Orthopaedic Surgery, Wakayama Medical University, 811-1 Kimiidera, Wakayama City, Wakayama 641-8510, Japan	Clinical outcomes of microendoscopic decompression surgery for cervical myelopathy.	European Spine Journal. 19 (3) (pp 487-493), 2010. Date of Publication: March 2010.		Retrospective study on the results of microendoscopic decompression surgery for the treatment of cervical myelopathy. The purpose of this study was to describe the microendoscopic laminoplasty (MEL) technique as the surgical method in the treatment of cervical myelopathy, and to document the clinical outcomes for MEL surgery. Endoscopic surgery poses several challenges for the aspiring endoscopic…	Journal: Article		2010
50	Lian X.F. Xu J.G. Zeng B.F. Zhou W. Kong W.Q. Hou T.S.		(Lian, Xu, Zeng, Zhou, Kong) Department of Orthopedics, Sixth People's Hospital, Shanghai Jiaotong University, Shanghai, China (Hou) Department of Orthopedics, Changhai Hospital, Shanghai, China	Noncontiguous anterior decompression and fusion for multilevel cervical spondylotic myelopathy: A prospective randomized control clinical study.	European Spine Journal. 19 (5) (pp 713-719), 2010. Date of Publication: May 2010.		Anterior decompression and fusion is an established procedure in surgical treatment for multilevel cervical spondylotic myelopathy (MCSM). However, contiguous corpectomies and fusion (CCF) often induce postoperative complications such as nonunion, graft subsidence, and loss of lordotic alignment. As an alternative, noncontiguous corpectomies or one-level corpectomy plus adjacent- level discectomy…	Journal: Article		2010
51	Goffin J. Van Loon J. Van Calenbergh F. Lipscomb B.		(Goffin, Van Loon, Van Calenbergh) Department of Neurosurgery, Catholic University of Leuven, Belgium (Lipscomb) Medtronic Spinal and Biologics, Memphis, TN, United States	A clinical analysis of 4- and 6-year follow-up results after cervical disc replacement surgery using the Bryan Cervical Disc Prosthesis: Clinical article.	Journal of Neurosurgery: Spine. 12 (3) (pp 261-269), 2010. Date of Publication: March 2010.		Object. In this study, long-term results are presented from clinical studies of the Bryan Cervical Disc Prosthesis at University Hospital Gasthuisberg in Leuven, Belgium. A total of 98 patients (89 with 1-level and 9 with 2-level implantations) agreed to participate in follow-up studies for up to 10 years postoperatively. This article focuses on the 4- and 6-year results. Patients in one of the c…	Journal: Article		2010
52	Sivaraman A. Bhadra A.K. Altaf F. Singh A. Rai A. Casey A.T. Crawford R.J.		(Sivaraman, Bhadra, Altaf, Rai, Casey) Royal National Orthopaedic Hospital, Stanmore, London, United Kingdom (Singh, Crawford) Norfolk and Norwich University Hospital, Colney lane, Norwich, United Kingdom	Skip laminectomy and laminoplasty for cervical spondolytic myelopathy: A prospective study of clinical and radiologic outcomes.	Journal of Spinal Disorders and Techniques. 23 (2) (pp 96-100), 2010. Date of Publication: April 2010.		Study Design: A prospective nonrandomized study comparing the outcomes of the 2 surgical techniques used in the treatment of cervical spondolytic myelopathy. Objective: We prospectively compared the skip laminectomy and laminoplasty in terms of extent of decompression achieved, axial pain, postoperative range of cervical motion, and patient and surgical outcomes. Summary of background data: Lamin…	Journal: Article		2010
53	Mihara H. Kondo S. Murata A. Ishida K. Niimura T. Hachiya M.		(Mihara, Kondo, Murata, Ishida, Niimura, Hachiya) Division of Spine Surgery, Department of Orthopaedic Surgery, Yokohama Minami Kyosai Hospital, 1-21-1 Mutuura Higashi, Kanazawa, Yokohama, 236-0037, Japan	A new performance test for cervical myelopathy: The triangle step test.	Spine. 35 (1) (pp 32-35), 2010. Date of Publication: January 2010.		Study Design. Our original performance test for evaluating the severity of cervical myelopathy, the triangle step test (TST), was introduced along with an assessment of its validity. Objective. The TST was designed to evaluate the lower extremity motor function objectively and quantitatively. This study aimed to assess the validity of the test by analyzing the relation to the other analytic metho…	Journal: Article		2010
54	Eck J.C. Drew J. Currier B.L.		(Eck, Drew) Department of Orthopedics and Physical Rehabilitation, University of Massachusetts, 119 Belmont Street, Worcester, MA 01605, United States (Currier) Department of Orthopedic Surgery, Mayo Clinic, Rochester, MN, United States	Effects of magnetic resonance imaging signal change in myelopathic patients: A meta-analysis.	Spine. 35 (23) (pp E1306-E1309), 2010. Date of Publication: 01 Nov 2010.		Study Design: Meta-analysis. Objective: Meta-analysis of the data to determine the effect of magnetic resonance imaging (MRI) signal change on preoperative and postoperative Japanese Orthopedic Association (JOA) scores and on recovery rate after surgery. Summary Of Background Data: MRI signal changes are commonly found in myelopathy. There is often an increased T2 signal with or without a decreas…	Journal: Article		2010
55	Halvorsen C.M. Lied B. Harr M.E. Ronning P. Sundseth J. Kolstad F. Helseth E.		(Halvorsen, Helseth) Faculty of Medicine, University of Oslo, Oslo, Norway (Lied, Harr, Ronning, Helseth) Department of Neurosurgery, Oslo University Hospital - Ulleval, Oslo, Norway (Sundseth, Kolstad) Department of Neurosurgery, Oslo University Hospital, Rikshospitalet, Norway	Surgical mortality and complications leading to reoperation in 318 consecutive posterior decompressions for cervical spondylotic myelopathy.	Acta Neurologica Scandinavica. 123 (5) (pp 358-365), 2011. Date of Publication: May 2011.		Objective: To determine surgical mortality, incidence of surgery-related neurological deterioration and incidence of postoperative infection or hematoma requiring reoperation in a consecutive series of 318 patients surgically treated with laminectomy or laminoplasty for cervical spondylotic myelopathy (CSM). Materials and Methods: This is a retrospective study of 318 consecutive patients treated …	Journal: Article		2011
56	Wan J. Xu T.-T. Shen Q.-F. Li H.-N. Xia Y.-P.		(Wan, Xu, Shen, Li, Xia) Department of Orthopaedic Surgery, Tianjin Union Medicine Center, Tianjin, China	Influence of hinge position on the effectiveness of open-door expansive laminoplasty for cervical spondylotic myelopathy.	Chinese Journal of Traumatology - English Edition. 14 (1) (pp 36-41), 2011. Date of Publication: February 2011.		Objective: To assess the influence of different hinge positions on clinical results of expansive open-door laminoplasty (EOLP) for cervical spondylotic myelopathy (CSM). Methods: A total of 102 CSM patients who underwent EOLP from February 2006 to February 2007 were enrolled in this randomized controlled trial. Using a random digits table, 57 patients with the hinge located at the inner margin of…	Journal: Article		2011
57	Cheng L. Nie L. Li M. Huo Y. Pan X.		(Cheng, Nie, Li, Huo, Pan) Department of Orthopaedics, Qilu Hospital, Shandong University, 107 West Wenhua Road, Jinan, Shandong 250012, China	Superiority of the Bryan disc prosthesis for cervical myelopathy: A randomized study with 3-year followup.	Clinical Orthopaedics and Related Research. 469 (12) (pp 3408-3414), 2011. Date of Publication: December 2011.		Background: The current standard of care for cervical myopathy is anterior discectomy and fusion (ACDF). Although well tolerated in the short term, this treatment might ultimately result in progressive degeneration of adjacent motion segments. Artificial disc arthroplasty offers the theoretical advantage of preservation of motion at the operative level with consequent stress reduction at adjacent…	Journal: Article		2011
58	Cho Y.E. Shin J.J. Kim K.S. Chin D.K. Kuh S.U. Lee J.H. Cho W.H.		(Cho, Kim, Chin, Kuh) Department of Neurosurgery, Gangnam Severance Spine Hospital, Yonsei University College of Medicine, 146-92, Dogok-Dong, Kangnam-gu, Kangnam, Seoul 135-720, South Korea (Shin) Department of Neurosurgery, Sanggye Paik Hospital, Inje University College of Medicine, Sanggye-7 dong, 761-1, Nowon-gu, Seoul 139-707, South Korea (Lee, Cho) Department of Radiology, Sanggye Paik Hosp…	The relevance of intramedullary high signal intensity and gadolinium (Gd-DTPA) enhancement to the clinical outcome in cervical compressive myelopathy.	European Spine Journal. 20 (12) (pp 2267-2274), 2011. Date of Publication: December 2011.		Purpose We prospectively investigated whether high intramedullary SI and contrast [gadolinium-diethylenetriamine- pentaacetic acid (Gd-DTPA)] enhancement in magnetic resonance imaging (MRI) are associated with postoperative prognosis in cervical compressive myelopathy (CCM) patients. Methods Seventy-four patients with ventral cord compression at one or two levels underwent anterior cervical disce…	Journal: Article		2011
59	Liu T. Xu W. Cheng T. Yang H.-L.		(Liu, Yang) Department of Orthopaedic Surgery, First Affiliated Hospital, Soochow University, No 188, Shizi Street, Suzhou 215006, China (Xu) Department of Epidemiology and Biostatistics, Public Health School, Soochow University, Suzhou, China (Cheng) Department of Orthopaedic Surgery, Jiaotong University, Shanghai Sixth People's Hospital, Shanghai, China	Anterior versus posterior surgery for multilevel cervical myelopathy, which one is better? A systematic review.	European Spine Journal. 20 (2) (pp 224-235), 2011. Date of Publication: February 2011.		The objective of the study is to perform a systematic review to compare the clinical outcomes and complications of anterior surgery with posterior surgery for multilevel cervical myelopathy (MCM). MEDLINE, EMBASE databases and other databases were searched for all the relevant original articles published from January 1991 to November 2009 comparing anterior with posterior surgery for MCM. Subgrou…	Journal: Article		2011
60	Nagashima H. Dokai T. Hashiguchi H. Ishii H. Kameyama Y. Katae Y. Morio Y. Morishita T. Murata M. Nanjo Y. Takahashi T. Tanida A. Tanishima S. Yamane K. Teshima R.		(Nagashima, Dokai, Nanjo, Tanida, Teshima) Department of Orthopedic Surgery, Faculty of Medicine, Tottori University, 36-1 Nishi-machi, Yonago, Tottori 683-8504, Japan (Hashiguchi, Katae) Department of Orthopedic Surgery, Japan Labour Health and Welfare Organization, Sanin Rosai Hospital, 1-8-1 Kaikeshinden, Yonago, Tottori 683-8605, Japan (Ishii, Morio) Department of Orthopaedic Surgery, Misasao…	Clinical features and surgical outcomes of cervical spondylotic myelopathy in patients aged 80 years or older: A multi-center retrospective study.	European Spine Journal. 20 (2) (pp 240-246), 2011. Date of Publication: February 2011.		With the aging of the population in developed countries, spine surgeons have recently been more likely to encounter elderly patients in need of treatment. This study investigated whether decompression surgery for cervical spondylotic myelopathy (CSM) in elderly patients aged 80 years or older would likely be a reasonable treatment. We retrospectively reviewed 605 consecutive patients with cervica…	Journal: Article		2011
61	Nakashima H. Yukawa Y. Ito K. MacHino M. Kanbara S. Morita D. Imagama S. Hamajima N. Ishiguro N. Kato F.		(Nakashima, Imagama, Ishiguro) Department of Orthopedic Surgery, Nagoya University Graduate School of Medicine, 65 Tsurumai, Shouwa-ku, Nagoya, Aichi 466-8560, Japan (Yukawa, Ito, MacHino, Kanbara, Morita, Kato) Department of Orthopedic Surgery, Chubu Rosai Hospital, Nagoya, Japan (Hamajima) Department of Preventive Medicine, Nagoya University Hospital, Nagoya, Japan	Validity of the 10-s step test: Prospective study comparing it with the 10-s grip and release test and the 30-m walking test.	European Spine Journal. 20 (8) (pp 1318-1322), 2011. Date of Publication: August 2011.		Cervical compressive myelopathy (CCM) is one of the common neurological disorders seen in the geriatric population. The 10-s Grip and Release ("G and R") Test and the 30-m Walking ("Walking") Test are widely known as quantifiable physical assessments for the severity of cervical myelopathy. We developed the 10-s Step ("Step") Test as another easily performable quantifiable measure for this. Howev…	Journal: Article		2011
62	Sun Q. Hu H. Zhang Y. Li Y. Chen L. Chen H. Yuan W.		(Sun, Zhang, Li, Chen, Chen, Yuan) Department of Orthopedics, Changzheng Hospital, Secondary Millitary Medical University of China, 415 Fengyang Road, Shanghai 200003, China (Sun, Hu) Department of Orthopedics, No. 88 Hospital of Chinese People's Liberation Army, Taian, China	Do intramedullary spinal cord changes in signal intensity on MRI affect surgical opportunity and approach for cervical myelopathy due to ossification of the posterior longitudinal ligament?.	European Spine Journal. 20 (9) (pp 1466-1473), 2011. Date of Publication: September 2011.		Some controversy still exists over the optimal treatment time and the surgical approach for cervical myelopathy due to ossification of the posterior longitudinal ligament (OPLL). The aim of the current study was first to analyze the effect of intramedullary spinal cord changes in signal intensity (hyperintensity on T2-weighted imaging and hypointensity on T1-weighted imaging) on magnetic resonanc…	Journal: Article		2011
63	Sasso R.C. Anderson P.A. Riew K.D. Heller J.G.		(Sasso) Indiana Spine Group, 8402 Harcourt Road, Indianapolis, IN 46260, United States (Anderson) Department of Orthopedic Surgery and Rehabilitation, University of Wisconsin, 600 Highland Avenue K4/736, Madison, WI 53792, United States (Riew) Washington University Orthopedics, One Barnes-Jewish Hospital Plaza, St. Louis, MO 63110-1003, United States (Heller) Department of Orthopaedic Surgery, Em…	Results of cervical arthroplasty compared with anterior discectomy and fusion: Four-year clinical outcomes in a prospective, randomized controlled trial.	Journal of Bone and Joint Surgery - Series A. 93 (18) (pp 1684-1692), 2011. Date of Publication: 21 Sep 2011.		Background: The published two-year results of the pivotal U.S. Food and Drug Administration investigational device exemption trial with the use of the Bryan cervical disc arthroplasty compared with anterior cervical discectomy with fusion for treating single-level degenerative cervical disc disease revealed a significantly superior overall success rate in the arthroplasty group. The purpose of th…	Journal: Article		2011
64	Chen K. Chen Z. Jin A.-m. Zhang H. Min S.-x. Duan Y. Zhang X.-b. Ye W.-m.		(Chen, Chen, Jin, Zhang, Min, Duan, Zhang, Ye) Department of Orthopaedics, Zhujiang Hospital of Southern Medical Uinversity, Guangzhou 510282, Guangdong Province, China	Systematic review the effects of four operative techniques in treating cervical spondylotic myelopathy.	Journal of Clinical Rehabilitative Tissue Engineering Research. 15 (48) (pp 9059-9063), 2011. Date of Publication: 2011.		BACKGROUND: There is still a controversy about the surgery in treating multilevel cervical spondylotic myelopathy (CSM). OBJECTIVE: To review 4 operative techniques which were used for the CSM treatment. METHODS: From 1980 to December 2010, a systematic review of retrospective cohort studies with multilevel anterior multilevel corpectomyand fusion (AMCF), anterior cervical discectomy and fusion(A…	Journal: Article		2011
65	Furlan J.C. Kalsi-Ryan S. Kailaya-Vasan A. Massicotte E.M. Fehlings M.G.		(Furlan, Fehlings) Division of Genetics and Development, Toronto Western Research Institute, University Health Network, Canada (Kalsi-Ryan) Krembil Neuroscience Centre, Toronto Western Hospital, University Health Network, Canada (Kalsi-Ryan, Massicotte, Fehlings) Graduate Department of Rehabilitation Science, University of Toronto, ON, Canada (Kailaya-Vasan) Department of Surgery, Division of Neu…	Functional and clinical outcomes following surgical treatment in patients with cervical spondylotic myelopathy: A prospective study of 81 cases.	Journal of Neurosurgery: Spine. 14 (3) (pp 348-355), 2011. Date of Publication: March 2011.		Object. Cervical spondylotic myelopathy (CSM) is the most common cause of spinal dysfunction in the elderly. Operative management is beneficial for most patients with moderate/severe myelopathy. This study examines the potential confounding effects of age, sex, duration of symptoms, and comorbidities on the functional outcomes and postoperative complications in patients who underwent cervical dec…	Journal: Article		2011
66	Liu T. Yang H.-L. Xu Y.-Z. Qi R.-F. Guan H.-Q.		(Liu, Yang, Xu, Qi, Guan) Department of Orthopaedic Surgery, First Affiliated Hospital of Soochow University, No 188, Shizi Street, Suzhou 215006, China	ACDF with the PCB cage-plate system versus laminoplasty for multilevel cervical spondylotic myelopathy.	Journal of Spinal Disorders and Techniques. 24 (4) (pp 213-220), 2011. Date of Publication: June 2011.		STUDY DESIGN: A nonrandomized controlled trial. OBJECTIVE: To compare the clinical outcomes, radiographic changes, and complications of patients with multilevel cervical spondylotic myelopathy who underwent ACDF with the plate cage benezech (PCB) implant system and laminoplasty. SUMMARY OF BACKGROUND DATA: Using anterior or posterior surgery for multilevel cervical spondylotic myelopathy continue…	Journal: Article		2011
67	Chiewvit P. Tritrakarn S.-O. Phawjinda A. Chotivichit A.		(Chiewvit, Tritrakarn, Phawjinda) Division of Diagnostic Radiology, Department of Radiology, Faculty of Medicine, Siriraj Hospital, Mahidol University, Bangkok 10700, Thailand (Chotivichit) Department of Orthopedics Surgery, Faculty of Medicine Siriraj Hospital, Mahidol University, Bangkok, Thailand	Predictive value of magnetic resonance imaging in cervical spondylotic myelopathy in prognostic surgical outcome.	Journal of the Medical Association of Thailand. 94 (3) (pp 346-354), 2011. Date of Publication: March 2011.		Objective: Establish the predictive value of magnetic resonance imaging (MRI) for cervical spondylotic myelopathy as being a good operative outcome. Material and Method: A retrospective study of the 52 consecutive patients with cervical spondylotic myelopathy underwent both magnetic resonance imaging (MRI) cervical spines examination at Siriraj Hospital between January 2005 and June 2007. Surgery…	Journal: Article		2011
68	Ghogawala Z. Martin B. Benzel E.C. Dziura J. Magge S.N. Abbed K.M. Bisson E.F. Shahid J. Coumans J.-V.C.E. Choudhri T.F. Steinmetz M.P. Krishnaney A.A. King J.T. Butler W.E. Barker F.G. Heary R.F.		(Ghogawala) Wallace Clinical Trials Center, Yale University School of Medicine, Greenwich Hospital, 5 Perryridge Road, Greenwich, CT 06830, United States (Ghogawala, Abbed) Connecticut Spine Institute, Greenwich, CT, United States (Ghogawala, Abbed) Department of Neurosurgery, Yale University School of Medicine, New Haven, CT, United States (Dziura) Yale Center for Clinical Investigation, Yale Un…	Comparative effectiveness of ventral vs dorsal surgery for cervical spondylotic myelopathy.	Neurosurgery. 68 (3) (pp 622-630), 2011. Date of Publication: March 2011.		Background: Cervical spondylotic myelopathy (CSM) is the most common cause of spinal cord dysfunction. Objective: To determine the feasibility of a randomized clinical trial comparing the clinical effectiveness and costs of ventral vs dorsal decompression with fusion surgery for treating CSM. Methods: A nonrandomized, prospective, clinical pilot trial was conducted. Patients ages 40 to 85 years w…	Journal: Article		2011
69	Rhee J.M. Register B. Hamasaki T. Franklin B.		(Rhee, Register, Hamasaki, Franklin) Emory Spine Center, Department of Orthopaedic Surgery, Emory University School of Medicine, Atlanta, GA, United States	Plate-only open door laminoplasty maintains stable spinal canal expansion with high rates of hinge union and no plate failures.	Spine. 36 (1) (pp 9-14), 2011. Date of Publication: 01 Jan 2011.		Study Design. Prospective clinical series. Objective. To evaluate the ability of plate-only laminoplasty to achieve stable laminar arch reconstruction and to determine the rate and time course with which bony healing occurs in such constructs. Summary of Background Data. Reconstruction of a stable laminar arch with sufficient room for the decompressed spinal cord is a desired goal when performing…	Journal: Article		2011
70	Hirai T. Okawa A. Arai Y. Takahashi M. Kawabata S. Kato T. Enomoto M. Tomizawa S. Sakai K. Torigoe I. Shinomiya K.		(Hirai, Okawa, Arai, Takahashi, Kawabata, Kato, Enomoto, Tomizawa, Sakai, Torigoe, Shinomiya) Department of Orthopedic Surgery, Tokyo Medical and Dental University, 1-5-45 Yushima, Bunkyo-Ku, Tokyo 113-8519, Japan	Middle-term results of a prospective comparative study of anterior decompression with fusion and posterior decompression with laminoplasty for the treatment of cervical spondylotic myelopathy.	Spine. 36 (23) (pp 1940-1947), 2011. Date of Publication: 01 Nov 2011.		Study Design.: A clinical prospective study. Objective.: To assess whether clinical and radiologic outcomes differ between anterior decompression and fusion (ADF) and laminoplasty (LAMP) in the treatment of cervical spondylotic myelopathy (CSM). Summary of Background Data.: No reports to date have accurately and prospectively compared middle-term clinical outcomes after anterior and posterior dec…	Journal: Article		2011
71	Park D.K. Lin E.L. Phillips F.M.		(Park, Lin, Phillips) Department of Orthopaedic Surgery, Rush University, Medical Center, Chicago, IL, United States (Phillips) Rush University, Medical Center, 1611 W Harrison Street, Chicago, IL 60612, United States	Index and adjacent level kinematics after cervical disc replacement and anterior fusion: In vivo quantitative radiographic analysis.	Spine. 36 (9) (pp 721-730), 2011. Date of Publication: 20 Apr 2011.		Study Design.: Prospective, randomized trial. Objective.: To assess the in vivo kinematics of the cervical spine after cervical fusion and arthroplasty. Summary of Background Data.: Compared with spinal fusion, disc replacement may impede the development of adjacent segment disease. To achieve this goal, any arthroplasty device should achieve desired spinal alignment while maintaining physiologic…	Journal: Article		2011
72	Epstein N.		(Epstein) Neurological Surgery, Albert Einstein College of Medicine, Bronx, NY 10451, United States (Epstein) Winthrop University Hospital, Mineola, NY 11501, United States	Efficacy of posterior cervical fusions utilizing an artificial bone graft expander, beta tricalcium phosphate.	Surgical Neurology International. 2 (1) , 2011. Article Number: 15. Date of Publication: 01 Jan 2011.		Background : Several cervical laminectomies and instrumented posterior cervical fusions utilize iliac autograft supplemented with demineralized bone matrix, or bone morphogenetic protein, but few utilize artificial bone graft expanders. Here we analyzed whether posterior cervical fusions could effectively utilize iliac autograft supplemented with an artificial bone graft expander, Beta Tricalcium…	Journal: Article		2011
73	Epstein N.		(Epstein) Neurological Surgery, Albert Einstein College of Medicine, Bronx, NY 10451, United States (Epstein) Winthrop University Hospital, Mineola, NY 11501, United States	Efficacy and outcomes of dynamic-plated single-level anterior diskectomy/fusion with additional analysis of comparative costs.	Surgical Neurology International. 2 (1) , 2011. Article Number: 9. Date of Publication: 01 Jan 2011.		Background: Few studies focus on the fusion rates and outcomes for single-level anterior cervical diskectomy/fusion (1-ACDF) utilizing iliac autograft and dynamic plates. Methods: Fusion rates and outcomes were prospectively evaluated in 60 consecutive patients undergoing 1-ACDF utilizing iliac autograft and dynamic plates (ABC; Aesculap, Tuttlingen, Germany). Eighteen patients had radiculopathy,…	Journal: Article		2011
74	Kimura A. Seichi A. Hoshino Y. Yamazaki M. Mochizuki M. Aiba A. Kato T. Uchida K. Miyamoto K. Nakahara S. Taniguchi S. Neo M. Taguchi T. Endo K. Watanabe M. Takahashi M. Kaito T. Chikuda H. Fujimori T. Ito T. Ono A. Abumi K. Yamada K. Nakagawa Y. Toyama Y.		(Kimura, Seichi, Hoshino) Department of Orthopaedics, Jichi Medical University, 3311-1 Yakushiji, Shimotsuke, Tochigi 329-0498, Japan (Yamazaki) Department of Orthopaedic Surgery, Chiba University, Graduate School of Medicine, 1-8-1 Inohana, Chuo-ku, Chiba 260-8670, Japan (Mochizuki, Aiba) Department of Orthopaedic Surgery, Numazu City Hospital, 550 Higashishiiji, Azaharunoki, Numazu 410-0302, Ja…	Perioperative complications of anterior cervical decompression with fusion in patients with ossification of the posterior longitudinal ligament: A retrospective, multi-institutional study.	Journal of Orthopaedic Science. 17 (6) (pp 667-672), 2012. Date of Publication: November 2012.		Background: Anterior decompression with fusion (ADF) for patients with cervical ossification of the posterior longitudinal ligament (OPLL) is reportedly associated with a higher incidence of complications than is laminoplasty. However, the frequency of perioperative complications associated with ADF for cervical OPLL has not been fully established. The purpose of this study was to investigate the…	Journal: Article		2012
75	Tang J.A. Scheer J.K. Smith J.S. Deviren V. Bess S. Hart R.A. Lafage V. Shaffrey C.I. Schwab F. Ames C.P.		(Tang, Ames) Department of Neurosurgery, University of California, San Francisco, Medical Center, 400 Parnassus Ave, A850, San Francisco, CA 94143, United States (Scheer) University of California, San Diego, School of Medicine, San Diego, CA, United States (Deviren) Department of Orthopedic Surgery, University of California, San Francisco, San Francisco, CA, United States (Bess) Rocky Mountain Sc…	The impact of standing regional cervical sagittal alignment on outcomes in posterior cervical fusion surgery.	Neurosurgery. 71 (3) (pp 662-669), 2012. Date of Publication: September 2012.		BACKGROUND:: Positive spinal regional and global sagittal malalignment has been repeatedly shown to correlate with pain and disability in thoracolumbar fusion. OBJECTIVE:: To evaluate the relationship between regional cervical sagittal alignment and postoperative outcomes for patients receiving multilevel cervical posterior fusion. METHODS:: From 2006 to 2010, 113 patients received multilevel pos…	Journal: Article		2012
76	Thakar S. Rajshekhar V.		(Thakar, Rajshekhar) Department of Neurological Sciences, Christian Medical College, Vellore 632004, India	Evaluation of pain as a preference-based health status measure in patients with cervical spondylotic myelopathy undergoing central corpectomy.	Acta Neurochirurgica. 154 (2) (pp 335-340), 2012. Date of Publication: February 2012.		Background: Assessment of pain in patients with cervical spondylotic myelopathy (CSM) before and after decompressive surgery has not been adequately addressed in the literature. The purpose of this study was to ascertain the intensity of various pain scores in patients with cervical spondylotic myelopathy (CSM) before and after surgery, and to assess their correlation with other outcome measures.…	Journal: Article		2012
77	Zhao X. Xue Y. Pan F. Zhao H. Li P. Wang P. Ma X.		(Zhao, Xue, Pan, Zhao, Li, Wang, Ma) Department of Orthopedic Surgery, Tianjin Medical University, General Hospital, Tianjin 300052, China	Extensive laminectomy for the treatment of ossification of the posterior longitudinal ligament in the cervical spine.	Archives of Orthopaedic and Trauma Surgery. 132 (2) (pp 203-209), 2012. Date of Publication: February 2012.		Objective: To introduce the surgical strategy of extensive laminectomy (with inner 1/4 facet joint resection to expose the origin of the nerve root) and to discuss its benefit for the treatment of cervical ossification of the posterior longitudinal ligament (OPLL) with myelopathy. Methods: From January 1998 to December 2005, 82 patients with cervical OPLL underwent extensive laminectomy. We asses…	Journal: Article		2012
78	Zhang P. Shen Y. Zhang Y.-Z. Ding W.-Y.		(Zhang, Shen, Zhang, Ding) Department of Spine Surgery, Third Hospital of Hebei Medical University, 139 Ziqiang Road, Shijiazhuang 050051, China	Prognosis significance of focal signal intensity change on MRI after anterior decompression for single-level cervical spondylotic myelopathy.	European Journal of Orthopaedic Surgery and Traumatology. 22 (4) (pp 269-273), 2012. Date of Publication: May 2012.		Objective The prognosis significance of signal intensity changes remains controversial, and several reports showed that focal-increased signal intensity is of little significance in prediction of the surgical outcome after the treatment of cervical spondylotic myelopathy (CSM). The purpose of this study was to investigate whether focal ISI can help assess the prognosis in patients with single-lev…	Journal: Article		2012
79	Liu Y. Qi M. Chen H. Yang L. Wang X. Shi G. Gao R. Wang C. Yuan W.		(Liu, Qi, Chen, Yang, Wang, Shi, Gao, Wang, Yuan) Department of Spine Surgery, Changzheng Orthopedics Hospital, Second Military Medical University, Shanghai 200003, China	Comparative analysis of complications of different reconstructive techniques following anterior decompression for multilevel cervical spondylotic myelopathy.	European Spine Journal. 21 (12) (pp 2428-2435), 2012. Date of Publication: December 2012.		Purpose: Anterior approach was extensively used in surgical treatment of multilevel cervical spondylotic myelopathy. Following anterior decompression, many different reconstructive techniques (multilevel ACDF, hybrid construct and long corpectomy) all had satisfied outcomes. However, there are few studies focusing on the comparison of these three reconstructed techniques. The aim of this retrospe…	Journal: Article		2012
80	Nakashima H. Yukawa Y. Ito K. Machino M. Kanbara S. Morita D. Takahashi H. Imagama S. Ito Z. Ishiguro N. Kato F.		(Nakashima, Imagama, Ito, Ishiguro) Department of Orthopedic Surgery, Nagoya University Hospital, Nagoya University Graduate School of Medicine, 65 Tsurumai, Shouwa-ku, Nagoya, Aichi 466-8560, Japan (Yukawa, Ito, Machino, Kanbara, Morita, Kato) Department of Orthopedic Surgery, Chubu Rosai Hospital, Nagoya, Japan (Takahashi) Division of Outcome Research, Kaikoukai Nagoya Kyoritsu Hospital, Nagoya…	Prediction of lower limb functional recovery after laminoplasty for cervical myelopathy: Focusing on the 10-s step test.	European Spine Journal. 21 (7) (pp 1389-1395), 2012. Date of Publication: July 2012.		Objective: Operative decompression is indicated for progressive neurological deterioration in patients with cervical compressive myelopathy (CCM). However, the best timing to ensure clinical recovery has not been determined because of the lack of a suitable method. 10 s step ("step") test is an easily performed physical test to assess the severity of CCM, particularly for the severity of lower li…	Journal: Article		2012
81	Kotani Y. Abumi K. Ito M. Sudo H. Takahata M. Nagahama K. Iwata A. Minami A.		(Kotani, Takahata, Nagahama, Iwata, Minami) Department of Orthopaedic Surgery, Hokkaido University Graduate School of Medicine, Kita-15, Nishi-7, Kitaku, Sapporo 060-8638, Japan (Abumi) Department of Spinal Reconstruction, Hokkaido University Graduate School of Medicine, Kita-15, Nishi-7, Kitaku, Sapporo 060-8638, Japan (Ito, Sudo) Department of Advanced Medicine for Spine and Spinal Cord Disorde…	Impact of deep extensor muscle-preserving approach on clinical outcome of laminoplasty for cervical spondylotic myelopathy: Comparative cohort study.	European Spine Journal. 21 (8) (pp 1536-1544), 2012. Date of Publication: August 2012.		Introduction: This study aimed to compare patients undergoing deep extensor muscle-preserving laminoplasty and conventional open-door laminoplasty for the treatment of cervical spondylotic myelopathy (CSM). We specifically assessed axial pain, cervical spine function, and quality of life (QOL) with a minimum follow-up period of 3 years. Patients and methods: Ninety patients were divided into two …	Journal: Article		2012
82	Sumi M. Miyamoto H. Suzuki T. Kaneyama S. Kanatani T. Uno K.		(Sumi, Kaneyama, Kanatani) Department of Orthopaedic Surgery, Kobe Rosai Hospital, 4-1-23, Kagoike-dori, Chuo-ku, Kobe 651-0053, Japan (Miyamoto, Suzuki, Uno) Department of Orthopaedic Surgery, Kobe Medical Center, Kobe, Japan	Prospective cohort study of mild cervical spondylotic myelopathy without surgical treatment: Clinical article.	Journal of Neurosurgery: Spine. 16 (1) (pp 8-14), 2012. Date of Publication: January 2012.		Object. Because the main pathology of cervical spondylotic myelopathy (CSM) is spinal cord damage due to compression, surgical treatment is usually recommended to improve patient symptoms and prevent exacerbation. However, lack of clarity of prognosis in cases that present with insignificant symptoms, particularly those of mild CSM, lead one to question the veracity of this course of action. The …	Journal: Article		2012
83	Fehlings M.G. Smith J.S. Kopjar B. Arnold P.M. Yoon S.T. Vaccaro A.R. Brodke D.S. Janssen M.E. Chapman J.R. Sasso R.C. Woodard E.J. Banco R.J. Massicotte E.M. Dekutoski M.B. Gokaslan Z.L. Bono C.M. Shaffrey C.I.		(Fehlings, Massicotte) Department of Neurosurgery, University of Toronto, Toronto, ON, Canada (Smith, Shaffrey) Department of Neurological Surgery, University of Virginia Health System, PO Box 800212, Charlottesville, VA 22908, United States (Kopjar) Department of Health Services, University of Washington, Seattle, WA, United States (Chapman) Department of Orthopaedics, University of Washington, …	Perioperative and delayed complications associated with the surgical treatment of cervical spondylotic myelopathy based on 302 patients from the AOSpine North America Cervical Spondylotic Myelopathy Study: Presented at the 2011 Spine Section Meeting - Clinical article.	Journal of Neurosurgery: Spine. 16 (5) (pp 425-432), 2012. Date of Publication: May 2012.		Object. Rates of complications associated with the surgical treatment of cervical spondylotic myelopathy (CSM) are not clear. Appreciating these risks is important for patient counseling and quality improvement. The authors sought to assess the rates of and risk factors associated with perioperative and delayed complications associated with the surgical treatment of CSM. Methods. Data from the AO…	Journal: Article		2012
84	Ishii M. Wada E. Hamada M.		(Ishii, Hamada) Department of Orthopaedic Surgery, Hoshigaoka Kosei Nenkin Hospital, 4-8-1 Hoshigaoka, Hirakata, Osaka 573-8511, Japan (Wada) Department of Orthopaedic Surgery, Ehime Prefectural Central Hospital, Matsuyama, Ehime, Japan	Deterioration of surgical outcomes with aging in patients with cervical spondylotic myelopathy.	Journal of Spinal Disorders and Techniques. 25 (7) (pp E199-E203), 2012. Date of Publication: October 2012.		STUDY DESIGN:: A retrospective investigation. OBJECTIVE:: To clarify at which age and at what point in the postoperative period neurological deterioration occurs in patients with cervical spondylotic myelopathy. SUMMARY OF BACKGROUND DATA:: Inferior surgical outcomes tend to be seen with increasing age, however, the age threshold and the postoperative period associated with deterioration have not…	Journal: Article		2012
85	Wang L. Song Y. Liu L. Liu H. Kong Q. Li T. Zeng J.		(Wang, Song, Liu, Liu, Kong, Li, Zeng) Department of Orthopedics, West China Hospital, Sichuan University, 37# Guoxue Lane, Chengdu, Sichuan-610 041, China	Clinical outcomes of two different types of open-door laminoplasties for cervical compressive myelopathy: A prospective study.	Neurology India. 60 (2) (pp 210-216), 2012. Date of Publication: 01 Apr 2012.		Background: Hirabayashi open-door laminoplasty is the most typical surgical treatment option for cervical compressive myelopathy, however, this conventional approach has many complications. To minimize these complications, many modified approaches have been devised. Aims: To compare clinical outcomes of two different types of open-door laminoplasties for cervical compressive myelopathy. Materials…	Journal: Article		2012
86	Nurboja B. Kachramanoglou C. Choi D.		(Nurboja) Department of Neurosurgery, Kings College Hospital, London, United Kingdom (Kachramanoglou) Department of Radiology, Kings College Hospital, London, United Kingdom (Choi) Department of Neurosurgery, National Hospital for Neurology and Neurosurgery, London, United Kingdom	Cervical laminectomy vs laminoplasty: Is there a difference in outcome and postoperative pain?.	Neurosurgery. 70 (4) (pp 965-970), 2012. Date of Publication: April 2012.		BACKGROUND: Cervical laminoplasty is often used for the decompression of multilevel cervical spondylotic myelopathy without creating spinal instability and kyphosis. OBJECTIVE: To assess the axial pain, quality of life, sagittal alignment, and extent of decompression after standard cervical laminectomy or laminoplasty. We further evaluate whether the sagittal alignment changes over time after bot…	Journal: Article		2012
87	Liu B. Ma W. Zhu F. Guo C.H. Yang W.L.		(Liu) Department of Orthopaedics, First Affiliated Hospital of Xi'an Jiaotong University, Xi'an, China.	Comparison between anterior and posterior decompression for cervical spondylotic myelopathy: subjective evaluation and cost analysis.	Orthopaedic surgery. 4 (1) (pp 47-54), 2012. Date of Publication: Feb 2012.		To compare anterior and posterior approaches for treating cervical spondylotic myelopathy (CSM) involving more than two levels, especially in regard to quality of life and cost effectiveness. The authors studied 116 CSM patients who underwent decompressive surgery by either an anterior or a posterior approach with instrumentation. In the anterior group, 1-3 levels subtotal vertebrectomy was follo…	Journal: Article		2012
88	Sadhu A. Ahn N.U.		(Sadhu) Case Western Reserve University, School of Medicine, 2087 Random Rd, Cleveland, OH 44106, United States (Ahn) University Hospitals of Cleveland Case Medical Center, Cleveland, OH, United States	Cocaine use and surgical outcomes of cervical spondylotic myelopathy: A retrospective study.	Orthopedics. 35 (11) (pp e1640-e1643), 2012. Date of Publication: November 2012.		The purpose of this study was to determine the average age of individuals diagnosed with cervical spinal myelopathy who are known cocaine users vs nonusers, as well as the postoperative change in neurological condition between cocaine users and nonusers. Medical records of patients diagnosed with cervical spinal myelopathy between January 1990 and May 2006 were reviewed. Ninety-four patients were…	Journal: Article		2012
89	MacHino M. Yukawa Y. Hida T. Ito K. Nakashima H. Kanbara S. Morita D. Kato F.		(MacHino, Yukawa, Hida, Ito, Nakashima, Kanbara, Morita, Kato) Department of Orthopedic Surgery, Chubu Rosai Hospital, Japan Labor Health and Welfare Organization, 1-10-6 Komei, Minato-ku, Nagoya, Aichi 455, Japan	Persistent physical symptoms after laminoplasty: Analysis of postoperative residual symptoms in 520 patients with cervical spondylotic myelopathy.	Spine. 37 (11) (pp 932-936), 2012. Date of Publication: 15 May 2012.		Study Design. A large-scale retrospective study of analysis of postoperative residual symptom in patients with cervical spondylotic myelopathy (CSM). Objective. The purpose of this study was to investigate which symptom remains postoperatively in a large series of patients with CSM. Summary of Background Data. CSM is an increasingly common neurological disorder of the geriatric population. Cervic…	Journal: Article		2012
90	Matsumoto M. Watanabe K. Hosogane N. Tsuji T. Ishii K. Nakamura M. Chiba K. Toyama Y.		(Matsumoto, Hosogane, Tsuji, Ishii, Nakamura, Chiba, Toyama) Department of Orthopaedic Surgery, School of Medicine, Keio University, 35 Shinanomachi, Shinjuku-ku, Tokyo 160-8582, Japan (Watanabe) Advanced Therapy for Spine and Spinal Cord Disease, School of Medicine, Keio University, Tokyo, Japan	Impact of lamina closure on long-term outcomes of open-door laminoplasty in patients with cervical myelopathy: Minimum 5-year follow-up study.	Spine. 37 (15) (pp 1288-1291), 2012. Date of Publication: 01 Jul 2012.		Study Design: A prospective follow-up study. Objective: To elucidate the impact of lamina closure on long-term outcomes after open-door laminoplasty. Summary of Background Data: In a previous study, we did not find significant associations between lamina closure and short-term outcomes. Methods: Of the original cohort of 82 patients who underwent open-door laminoplasty, 69 were included in this s…	Journal: Article		2012
91	Wen S.-F. Wong I.O.-L. Long M.-J. Li J.-G. Li X.-F. Guo D.-M. Xu Z.-H. Yin Q.-S.		(Wen, Guo, Xu) Department of Spine Surgery, First Municipal People's Hospital of Guangzhou, Affiliated Hospital to the Guangzhou Medical University, 1st Pan Fu Rd., Guangzhou 510180, China (Wen) Southern Medical University, Guangzhou, China (Wong, Long) School of Public Health, Li Ka Shing Faculty of Medicine, University of Hong Kong, Hong Kong (Li) Department of Orthopedics, Second Affiliated Ho…	Effectiveness of 3 surgical decompression strategies for treatment of multilevel cervical myelopathy in 3 spinal centers in China: A retrospective study.	Spine. 37 (17) (pp 1463-1469), 2012. Date of Publication: 01 Aug 2012.		STUDY DESIGN. Retrospective multicenter study. OBJECTIVE. To compare clinical outcomes and surgical-related adverse events in patients with multilevel cervical myelopathy (MCM) undergoing simple anterior, simple posterior, or 1-stage posterior-anterior surgical decompression strategies. SUMMARY OF BACKGROUND DATA. Simple anterior, simple posterior, and 1-stage posterior-anterior surgical decompre…	Journal: Article		2012
92	Numasawa T. Ono A. Wada K. Yamasaki Y. Yokoyama T. Aburakawa S. Takeuchi K. Kumagai G. Kudo H. Umeda T. Nakaji S. Toh S.		(Numasawa, Ono, Wada, Yamasaki, Toh) Department of Orthopaedic Surgery, Hirosaki University Graduate School of Medicine, 5 Zaifu-cho, Hirosaki, Aomori, 036-8562, Japan (Yokoyama) Department of Orthopaedic Surgery, Odate Municipal General Hospital, Odate, Akita, Japan (Aburakawa, Kumagai) Department of Orthopaedic Surgery, Aomori Rosai Hospital, Shirogane-cho, Hachinohe, Aomori, Japan (Takeuchi, K…	Simple foot tapping test as a quantitative objective assessment of cervical myelopathy.	Spine. 37 (2) (pp 108-113), 2012. Date of Publication: 15 Jan 2012.		STUDY DESIGN.: A clinical and cohort study. OBJECTIVE.: The first purpose of this study was to investigate the standard value of a simple foot tapping test (FTT) in a large healthy population. The second purpose was to elucidate the validity of FTT as a quantitative assessment of lower extremity motor function for cervical compressive myelopathy. SUMMARY OF BACKGROUND DATA.: Several clinical perf…	Journal: Article		2012
93	MacHino M. Yukawa Y. Hida T. Ito K. Nakashima H. Kanbara S. Morita D. Kato F.		(MacHino, Yukawa, Hida, Ito, Nakashima, Kanbara, Morita, Kato) Department of Orthopedic Surgery, Chubu Rosai Hospital, Japan Labor Health and Welfare Organization, 1-10-6 Komei, Minato-ku, Nagoya, Aichi, 455-8530, Japan	The prevalence of pre- and postoperative symptoms in patients with cervical spondylotic myelopathy treated by cervical laminoplasty.	Spine. 37 (22) (pp E1383-E1388), 2012. Date of Publication: 15 Oct 2012.		Study Design: A retrospective single-center study. Objective: To investigate the prevalence of symptoms before and after surgery in a large series of patients with cervical spondylotic myelopathy (CSM). Summary of Background Data: No study has elucidated the epidemiological data regarding the prevalence of pre- and postoperative symptoms in patients with CSM. Methods: Five hundred twenty consecut…	Journal: Article		2012
94	Sakai K. Okawa A. Takahashi M. Arai Y. Kawabata S. Enomoto M. Kato T. Hirai T. Shinomiya K.		(Sakai, Okawa, Takahashi, Arai, Kawabata, Enomoto, Kato, Hirai, Shinomiya) Department of Orthopedic Surgery, Graduate School, Tokyo Medical and Dental University, Yushima 15-45, Bunkyo-Ku, Tokyo, 113-8519, Japan	Five-year follow-up evaluation of surgical treatment for cervical myelopathy caused by ossification of the posterior longitudinal ligament: A prospective comparative study of anterior decompression and fusion with floating method versus laminoplasty.	Spine. 37 (5) (pp 367-376), 2012. Date of Publication: 01 Mar 2012.		Study Design: Prospective, comparative clinical study. Objective: To compare the clinical outcome of anterior decompression and fusion with floating method and laminoplasty in the treatment of cervical myelopathy caused by ossification of the posterior longitudinal ligament (OPLL). Summary of Background Data: There have been no reports that have accurately and prospectively compared surgical outc…	Journal: Article		2012
95	Zhang X. Chen C. Zhang Y. Wang Z. Wang B. Yan W. Li M. Yuan W. Wang Y.		(Zhang, Zhang, Wang, Wang, Wang) Division of Orthopaedics, Chinese PLA General Hospital, No. 28, Fuxing Road, Haidian District, Beijing 100853, China (Zhang, Li) China-Japan Friendship Hospital, Shanghai, China (Chen) Department of Spinal and Neural Functional Reconstruction, China Rehabilitation Research Center, Beijing, China (Yan, Yuan) Division of Orthopaedics, Changzheng Hospital, Shanghai, …	Randomized, controlled, multicenter, clinical trial comparing BRYAN cervical disc arthroplasty with anterior cervical decompression and fusion in china.	Spine. 37 (6) (pp 433-438), 2012. Date of Publication: March-15, 2012.		Study Design.: Prospective, randomized, controlled, multicenter clinical trial. Objective.: To compare outcomes of cervical disc arthroplasty with those of anterior cervical decompression and fusion (ACDF) in a Chinese population. Summary of Background Data.: Cervical disc arthroplasty has been found to be superior to ACDF for maintaining range of motion (ROM) at the index spinal segment and poss…	Journal: Article		2012
96	MacHino M. Yukawa Y. Hida T. Ito K. Nakashima H. Kanbara S. Morita D. Kato F.		(MacHino, Yukawa, Hida, Ito, Nakashima, Kanbara, Morita, Kato) Department of Orthopedic Surgery, Chubu Rosai Hospital, Japan Labor Health and Welfare Organization, 1-10-6 Komei, Minato-ku, Nagoya, Aichi 455-8530, Japan	Can elderly patients recover adequately after laminoplasty?: A comparative study of 520 patients with cervical spondylotic myelopathy.	Spine. 37 (8) (pp 667-671), 2012. Date of Publication: 15 Apr 2012.		Study Design.: This was a prospective clinical comparative study of surgical outcomes for patients with cervical spondylotic myelopathy (CSM). Objective.: The purpose of this study was to compare the surgical outcomes between nonelderly and elderly patients with CSM who underwent laminoplasty. Summary of Background Data.: Age at the time of surgery influences the surgical outcome. We designed a l…	Journal: Article		2012
97	Katsumi K. Yamazaki A. Watanabe K. Ohashi M. Shoji H.		(Katsumi, Yamazaki, Ohashi, Shoji) Spine Center, Department of Orthopaedic Surgery, Niigata Central Hospital, 1-18 Shinkocho, Chuo-ku, Niigata City, Niigata, 950-8556, Japan (Watanabe) Niigata University Medical, Dental General Hospital, Niigata Prefecture, Japan	Can prophylactic bilateral C4/C5 foraminotomy prevent postoperative C5 palsy after open-door laminoplasty?: A prospective study.	Spine. 37 (9) (pp 748-754), 2012. Date of Publication: 20 Apr 2012.		Study Design. A prospective study. Objective. To evaluate the effectiveness of prophylactic C4/C5 microforaminotomy with open-door laminoplasty for cervical myelopathy in preventing postoperative C5 palsy. Summary of Background Data. Postoperative C5 palsy is a common complication of cervical laminoplasty. Although the etiology of C5 palsy and preventive measures remain unclear, we hypothesize th…	Journal: Article		2012
98	Seng C. Tow B.P.B. Siddiqui M.A. Srivastava A. Wang L. Yew A.K.S. Yeo W. Khoo S.H.R. Balakrishnan N.M.S. Bin Abd Razak H.R. Chen J.L.T. Guo C.M. Tan S.B. Yue W.-M.		(Seng, Tow, Siddiqui, Srivastava, Wang, Yew, Yeo, Khoo, Balakrishnan, Bin Abd Razak, Chen, Guo, Tan, Yue) Department of Orthopaedic Surgery, Singapore General Hospital, 1 Outram Rd, Singapore 169608, Singapore	Surgically treated cervical myelopathy: A functional outcome comparison study between multilevel anterior cervical decompression fusion with instrumentation and posterior laminoplasty.		Spine Journal. 13 (7) (pp 723-731), 2013. Date of Publication: July 2013.	Background context: Multilevel cervical myelopathy can be treated with anterior cervical discectomy and fusion (ACDF) or corpectomy via the anterior approach and laminoplasty via the posterior approach. Till date, there is no proven superior approach. Purpose: To elucidate any potential advantage of one approach over the other with regard to clinical midterm outcomes in this study. Study design: …	Journal: Article		2013
99	Whitmore R.G. Ghogawala Z. Petrov D. Schwartz J.S. Stein S.C.		(Whitmore, Petrov, Stein) Department of Neurosurgery, Hospital of the University of Pennsylvania, Silverstein, 3400 Spruce St, Philadelphia, PA 19104, United States (Whitmore, Ghogawala) Department of Neurosurgery, Lahey Clinic Medical Center, 41 Mall Road, Burlington, MA 01805, United States (Ghogawala) Wallace Clinical Trials Center, Greenwich Hospital, 5 Perryridge Road, Greenwich, CT 06830, U…	Functional outcome instruments used for cervical spondylotic myelopathy: Interscale correlation and prediction of preference-based quality of life.		Spine Journal. 13 (8) (pp 902-907), 2013. Date of Publication: August 2013.	Background context: There is limited literature comparing different functional outcome measures used for cervical spondylotic myelopathy (CSM). Purpose: To determine the correlation among five functional outcome measures used in CSM patient assessment and their ability to predict preference-based quality of life (QOL). Study design/setting: Prospective observational study. Patient sample: Patient…	Journal: Article		2013
100	Pumberger M. Froemel D. Aichmair A. Hughes A.P. Sama A.A. Cammisa F.P. Girardi F.P.		(Pumberger, Froemel, Aichmair, Hughes, Sama, Cammisa, Girardi) Spine and Scoliosis Service, Hospital for Special Surgery, New York, NY, United States	Clinical predictors of surgical outcome in cervical spondylotic myelopathy: An analysis of 248 patients.		Bone and Joint Journal. 95 B (7) (pp 966-971), 2013. Date of Publication: July 2013.	The purpose of this study was to investigate the clinical predictors of surgical outcome in patients with cervical spondylotic myelopathy (CSM). We reviewed a consecutive series of 248 patients (71 women and 177 men) with CSM who had undergone surgery at our institution between January 2000 and October 2010. Their mean age was 59.0 years (16 to 86). Medical records, office notes, and operative re…	Journal: Article		2013
101	Wang D. Liu W. Cao Y. Yang L. Liu B. Yao G. Bi Z.		(Wang, Liu, Cao, Yang, Liu, Yao, Bi) Department of Orthopaedics, First Affiliated Hospital of Harbin Medical University, No. 23 Post Street, Nangang District, Harbin 150001, China	BMP-4 polymorphisms in the susceptibility of cervical spondylotic myelopathy and its outcome after anterior cervical corpectomy and fusion.		Cellular Physiology and Biochemistry. 32 (1) (pp 210-217), 2013. Date of Publication: 2013.	Background: To investigate the association between single nucleotide polymorphisms (SNPs) of bone morphogenic proteins-4 (BMP-4) gene and the susceptibility of cervical spondylotic myelopathy (CSM) and its outcome after surgical treatment. Method: A total of 499 patients with CSM and 602 healthy volunteers were recruited. 425 CSM patients received anterior cervical corpectomy and fusion (ACF) and…	Journal: Article		2013
102	Yoshida G. Kanemura T. Ishikawa Y. Matsumoto A. Ito Z. Tauchi R. Muramoto A. Matsuyama Y. Ishiguro N.		(Yoshida) Department of Orthopedic Surgery, Hamamatsu Medical Center, 328 Tomizuka-cho, Naka-ku, Hamamatsu Shizuoka 432-8580, Japan (Kanemura, Ishikawa, Matsumoto) Department of Orthopedic Surgery, Konan Kosei Hospital, Konan Aichi, Japan (Ito, Tauchi, Muramoto, Ishiguro) Department of Orthopedic Surgery, Nagoya University, Nagoya, Japan (Matsuyama) Department of Orthopedic Surgery, Hamamatsu Med…	The effects of surgery on locomotion in elderly patients with cervical spondylotic myelopathy.		European Spine Journal. 22 (11) (pp 2545-2551), 2013. Date of Publication: Novenber 2013.	Purpose: This study aimed to evaluate the effects of surgery on locomotor ability in patients with cervical spondylotic myelopathy (CSM) and compare the results between elderly and younger patients. Methods: A total of 369 consecutive patients who underwent expansive laminoplasty for CSM were prospectively analysed. Patients were divided into two age groups of >75 years (elderly group, 76 patient…	Journal: Article		2013
103	Fehlings M.G. Wilson J.R. Kopjar B. Yoon S.T. Arnold P.M. Massicotte E.M. Vaccaro A.R. Brodke D.S. Shaffrey C.I. Smith J.S. Woodard E.J. Banco R.J. Chapman J.R. Janssen M.E. Bono C.M. Sasso R.C. Dekutoski M.B. Gokaslan Z.L.		(Fehlings, Wilson, Massicotte) Division of Neurosurgery, University of Toronto, Toronto Western Hospital, West Wing, 399 Bathurst Street, Toronto, ON M5T 2S8, Canada (Kopjar) Department of Health Sciences, University of Washington, 4333 Brooklyn Avenue N.E., Seattle, WA 98195, United States (Yoon) Emory Orthopaedics and Spine Center, Emory University, 59 Executive Park, South Atlanta, GA 30329, U…	Efficacy and safety of surgical decompression in patients with cervical spondylotic myelopathy results of the aospine north america prospective multi-center study.		Journal of Bone and Joint Surgery - Series A. 95 (18) (pp 1651-1658), 2013. Date of Publication: 18 Sep 2013.	Background: Cervical spondylotic myelopathy is the leading cause of spinal cord dysfunction worldwide. The objective of this study was to evaluate the impact of surgical decompression on functional, quality-of-life, and disability outcomes at one year after surgery in a large cohort of patients with this condition. Methods: Adult patients with symptomatic cervical spondylotic myelopathy and magne…	Journal: Article		2013
104	Tetreault L.A. Kopjar B. Vaccaro A. Yoon S.T. Arnold P.M. Massicotte E.M. Fehlings M.G.		(Tetreault, Massicotte, Fehlings) Toronto Western Hospital, 399 Bathurst Street, Toronto, ON M5T 2S8, Canada (Kopjar) Department of Health Sciences, University of Washington, 4333 Brooklyn Avenue N.E., Seattle, WA 98195, United States (Vaccaro) Thomas Jefferson University, 925 Chestnut Street, Philadelphia, PA 19107-4216, United States (Yoon) Emory Orthopaedics and Spine Center, Emory University,…	A clinical prediction model to determine outcomes in patients with cervical spondylotic myelopathy undergoing surgical treatment data from the prospective, multi-center aospine North America study.		Journal of Bone and Joint Surgery - Series A. 95 (18) (pp 1659-1666), 2013. Date of Publication: 18 Sep 2013.	Background: Cervical spondylotic myelopathy is a progressive spine disease and the most common cause of spinal cord dysfunction worldwide. The objective of this study was to develop a prediction model, based on data from a prospective multi-center study, relating a combination of clinical and imaging variables to surgical outcome in patients with cervical spondylotic myelopathy. Methods: Two hund…	Journal: Article		2013
105	Singh D. Truumees E. Thorne D.H. Stokes J.K. Geck M.J.		(Singh, Truumees, Thorne, Stokes, Geck) Seton Spine and Scoliosis Center, Seton Brain and Spine Institute, University Medical Center at Brackenridge, 1600 W. 38th St., Austin, TX 78731, United States	Cervical stenosis in adults undergoing thoracolumbar deformity surgery: Incidence, treatment, and complications Clinical article.		Journal of Neurosurgery: Spine. 19 (3) (pp 293-296), 2013. Date of Publication: September 2013.	Object. The goals of this study were to determine the incidence of occult cervical stenosis in patients over 50 years old with thoracolumbar deformity and to assess the risk of progressive cervical myelopathy after complex thoracolumbar reconstruction in asymptomatic or mildly symptomatic patients with cervical stenosis. Methods. Charts and cervical imaging for patients who were over 50 years old…	Journal: Article		2013
106	Lee D.-G. Lee S.-H. Park S.-J. Kim E.-S. Chung S.-S. Lee C.-S. Eoh W.		(Lee, Lee, Kim, Eoh) Departments of Neurosurgery, Samsung Medical Center, Sungkyunkwan University, 50 Ilwon-dong, Gangnam-gu, Seoul 135-710, South Korea (Park, Chung, Lee) Departments of Orthopedic Surgery, Spine Center, Sungkyunkwan University, Seoul, South Korea	Comparison of surgical outcomes after cervical laminoplasty: Open-door technique versus french-door technique.		Journal of Spinal Disorders and Techniques. 26 (6) (pp E198-E203), 2013. Date of Publication: August 2013.	Study Design: A retrospective case series. Objective: To compare the surgical outcomes of open-door and French-door cervical laminoplasty for decompressing multilevel cervical spinal cord compressions. Summary of Background Data: Cervical laminoplasty is an effective method for decompressing multilevel cervical spinal cord compressions. Laminoplasty is usually classified as an open-door or French…	Journal: Article		2013
107	Phillips F.M. Lee J.Y.B. Geisler F.H. Cappuccino A. Chaput C.D. Devine J.G. Reah C. Gilder K.M. Howell K.M. McAfee P.C.		(Phillips, Lee) Midwest Orthopaedics, Rush University Medical Center, 1611 W. Harrison St, Ste 300, Chicago, IL 60612, United States (Geisler) Chicago Back Institute, Chicago, IL, United States (Cappuccino) Buffalo Spine Surgery, Buffalo, NY, United States (Chaput) Scott and White Hospital, Temple, TX, United States (Devine) Dwight D. Eisenhower Army Medical Center, Fort Gordon, GA, United States…	A prospective, randomized, controlled clinical investigation comparing PCM cervical disc arthroplasty with anterior cervical discectomy and fusion: 2-year results from the US FDA IDE clinical trial.		Spine. 38 (15) (pp E907-E918), 2013. Date of Publication: 01 Jul 2013.	Study Design.: Prospective, multicenter, randomized Food and Drug Administration approved investigational device exemption clinical trial. Objective.: To evaluate the safety and effectiveness of the PCM Cervical Disc compared with anterior cervical discectomy and fusion (ACDF) in the treatment of patients with degenerative spondylosis and neurological symptoms at 1 level between C3-C4 and C7-T1. …	Journal: Article		2013
108	Fehlings M.G. Barry S. Kopjar B. Yoon S.T. Arnold P. Massicotte E.M. Vaccaro A. Brodke D.S. Shaffrey C. Smith J.S. Woodard E. Banco R.J. Chapman J. Janssen M. Bono C. Sasso R. Dekutoski M. Gokaslan Z.L.		(Fehlings, Barry, Massicotte) University of Toronto, Division of Neurosurgery, Toronto Western Hospital, 399 Bathurst St., Toronto, ON M5T2S8, Canada (Kopjar, Chapman) University of Washington, Seattle, WA, United States (Yoon) Emory University, Atlanta, GA, United States (Arnold) University of Kansas, Kansas City, KS, United States (Vaccaro) Thomas Jefferson University, Philadelphia, PA, United …	Anterior versus posterior surgical approaches to treat cervical spondylotic myelopathy: Outcomes of the prospective multicenter AOSpine north America CSM study in 264 patients.		Spine. 38 (26) (pp 2247-2252), 2013. Date of Publication: 15 Dec 2013.	STUDY DESIGN.: A prospective observational multicenter study. OBJECTIVE.: To help solve the debate regarding whether the anterior or posterior surgical approach is optimal for patients with cervical spondylotic myelopathy (CSM). SUMMARY OF BACKGROUND DATA.: The optimal surgical approach to treat CSM remains debated with varying opinions favoring anterior versus posterior surgical approaches. We p…	Journal: Article		2013
109	Karpova A. Arun R. Davis A.M. Kulkarni A.V. Massicotte E.M. Mikulis D.J. Lubina Z.I. Fehlings M.G.		(Karpova, Arun, Massicotte, Fehlings) Division of Neurosurgery, University of Toronto, Toronto, ON, Canada (Karpova, Arun, Massicotte) Neural Repair and Regeneration, Toronto Western Hospital, University Health Network, 399 Bathurst St., Toronto, ON M5T 2S8, Canada (Davis) Departments of Physical Therapy, University Health Network, University of Toronto, Toronto, Canada (Kulkarni) Division of Neu…	Predictors of surgical outcome in cervical spondylotic myelopathy.		Spine. 38 (5) (pp 392-400), 2013. Date of Publication: 01 Mar 2013.	STUDY DESIGN. Prospective study. OBJECTIVE. To determine whether magnetic resonance imaging and clinical and demographic findings in patients with cervical spondylotic myelopathy (CSM) were independently associated with baseline functional scores and whether these were also predictive of postoperative functional outcomes. SUMMARY OF BACKGROUND DATA. There are considerable limitations in current l…	Journal: Article		2013
110	Bapat M.R. Chaudhary K. Sharma A. Laheri V.		(Bapat, Chaudhary, Sharma, Laheri) King Edward Memorial Hospital, Parel, Mumbai 400 014, India (Bapat) B-1002 Jagatvidya Society, Bandra (East), Mumbai 400 051, India	Surgical approach to cervical spondylotic myelopathy on the basis of radiological patterns of compression: Prospective analysis of 129 cases.	European Spine Journal. 17 (12) (pp 1651-1663), 2008. Date of Publication: December 2008.		This is a prospective analysis of 129 patients operated for cervical spondylotic myelopathy (CSM). Paucity of prospective data on surgical management of CSM, especially multilevel CSM (MCM), makes surgical decision making difficult. The objectives of the study were (1) to identify radiological patterns of cord compression (POC), and (2) to propose a surgical protocol based on POC and determine it…		Journal: Article
111	Yamazaki T. Yanaka K. Sato H. Uemura K. Tsukada A. Nose T. Cooper P.R. Sonntag V.K.H.		(Yamazaki, Sato, Uemura, Tsukada) Department of Neurosurgery, Kennan Hospital, Tsuchiura, Ibaraki, Japan (Yanaka, Nose) Department of Neurosurgery, Institute of Clinical Medicine, University of Tsukuba, Tsukuba, Ibaraki 305-8575, Japan	Cervical spondylotic myelopathy: Surgical results and factors affecting outcome with special reference to age differences.	Neurosurgery. 52 (1) (pp 122-126), 2003. Date of Publication: 01 Jan 2003.	OBJECTIVE: A variety of factors may affect the surgical outcome in patients with cervical spondylotic myelopathy. The aim of this study is to analyze the prognostic factors by comparing younger and elderly patient groups on the basis of preoperative radiological and clinical data. METHODS: To assess the prognostic factors after surgery had been performed, the clinical and radiological data of 64 …	Journal: Article		2003
112	Rajshekhar V. Kumar C.S.S.		(Rajshekhar, Kumar) Department of Neurological Sciences, Christian Medical College, Vellore 632 004, India	Functional outcome after central corpectomy in poor-grade patients with cervical spondylotic myelopathy or ossified posterior longitudinal ligament.	Neurosurgery. 56 (6) (pp 1279-1284), 2005. Date of Publication: June 2005.	OBJECTIVE: We studied the long-term functional outcome in poor-grade patients (Nurick Grades 4 and 5) with cervical spondylotic myelopathy (CSM) or ossified posterior longitudinal ligament after central corpectomy (CC). We sought to determine whether there were any prognostic factors that could predict functional outcome in these patients. METHODS: Functional outcome data were collected for 72 pa…	Journal: Article		2005
113	Ding Y. Hu Y. Ruan D.-K. Chen B.		(Ding, Ruan, Chen) Department of Orthopaedics, Navy General Hospital, Beijing 100037, China (Hu) Department of Orthopaedics and Traumatology, University of Hong Kong, The Duchess of Kent Children's Hospital, Hong Kong, Hong Kong	Value of somatosensory evoked potentials in diagnosis, surgical monitoring and prognosis of cervical spondylotic myelopathy.	Chinese Medical Journal. 121 (15) (pp 1374-1378), 2008. Date of Publication: 05 Aug 2008.		Background: The value of somatosensory evoked potentials (SEPs) in the diagnosis and prognosis of cervical spondylotic myelopathy, as well as the usefulness of monitoring intraoperative potentials in terms of safety and predictive factors were investigated. Methods: Each of the 76 myelopathic patients underwent surgical intervention. According to the wave configurations of the SEPs, the cases wer…		Journal: Article
114	Stawicki S.P. Guarnaschelli J.J. Dzenitis A.J.		(Stawicki) OPUS 12 Foundation, King of Prussia, PA 19406, United States (Guarnaschelli, Dzenitis) Neurosurgical Group of Greater Louisville, Louisville, KY 40202, United States	Cervical disc disease in geriatric patients: A comparison study.	European Journal of General Medicine. 6 (3) (pp 140-143), 2009. Date of Publication: 2009.		Aim: Cervical disc disease (CDD) is a common clinical entity. This is a retrospective comparison study of surgical CDD outcomes in 285 geriatric patients (age > 65) and 2715 non-geriatric patients (age < 65). Methods: The geriatric group consisted of 146 men and 139 women, with mean age of 70.4 years. Results: Geriatric patients, when compared to non-geriatric patients, were more likely to presen…		Journal: Article
115	Morishita Y. Naito M. Hymanson H. Miyazaki M. Wu G. Wang J.C.		(Morishita, Hymanson, Miyazaki, Wu) Department of Orthopaedic Surgery, University of California at Los Angeles, Los Angeles, CA 90095, United States (Naito) Department of Orthopaedic Surgery, Fukuoka University, Fukuoka, Japan (Wang) UCLA Comprehensive Spine Center, 1250 16th Street, Santa Monica, CA 90404, United States	The relationship between the cervical spinal canal diameter and the pathological changes in the cervical spine.	European Spine Journal. 18 (6) (pp 877-883), 2009. Date of Publication: June 2009.		A congenitally narrow cervical spinal canal has been established as an important risk factor for the development of cervical spondylotic myelopathy. However, few reports have described the mechanism underlying this risk. In this study, we investigate the relationship between cervical spinal canal narrowing and pathological changes in the cervical spine using positional magnetic resonance imaging …		Journal: Article
116	Riew K.D. Buchowski J.M. Sasso R. Zdeblick T. Metcalf N.H. Anderson P.A.		(Riew, Buchowski) Department of Orthopaedic Surgery, Washington University in St. Louis, Campus Box 8233, 660 South Euclid Avenue, St. Louis, MO 63110, United States (Sasso) Indiana Spine Group, 8402 Harcourt Road, Indianapolis, IN 46260, United States (Zdeblick, Anderson) Department of Orthopaedics and Rehabilitation, University of Wisconsin, 600 Highland Avenue, Madison, WI 53792-7375, United S…	Cervical disc arthroplasty compared with arthrodesis for the treatment of myelopathy.	Journal of Bone and Joint Surgery - Series A. 90 (11) (pp 2354-2364), 2008. Date of Publication: 01 Nov 2008.		Background: Although there have been case reports describing the use of cervical disc arthroplasty for the treatment of myelopathy, there is a concern thatmotion preservationmaymaintain microtrauma to the spinal cord, negatively affecting the clinical results. As we are not aware of any studies on the use of arthroplasty in this scenario, we performed a cross-sectional analysis of two large, pros…		Journal: Article
117	Sekhon L.H.S.		(Sekhon) SpineNevada, 75 Pringle Way, Reno, NV 89502, United States	Posterior cervical decompression and fusion for circumferential spondylotic cervical stenosis: Review of 50 consecutive cases.	Journal of Clinical Neuroscience. 13 (1) (pp 23-30), 2006. Date of Publication: January 2006.	Purpose of Study: This study presents a clinical and radiological evaluation of 50 consecutive patients with symptomatic spondylotic cervical myelopathy and circumferential spinal cord compression who were managed with a single stage wide posterior laminectomy and lateral mass instrumented fusion. Methods Used: 50 consecutive patients (33 male, 17 female) over a 4 year period presenting with symp…	Journal: Article		2006
118	Kaito T. Hosono N. Makino T. Kaneko N. Namekata M. Fuji T.		(Kaito) Department of Orthopedics, National Hospital Organization Osaka Minami Medical Center, Kawachinagano, Japan (Hosono, Makino, Kaneko, Namekata, Fuji) Department of Orthopaedic Surgery, Osaka Kosei-nenkin Hospital, Fukushima-ku, Osaka, Japan (Kaito) Department of Orthopedics, National Hospital Organization Osaka Minami Medical Center, 2-1 Kidohigashi-machi, Kawachinagano, Osaka 586-8521, Ja…	Postoperative displacement of hydroxyapatite spacers implanted during double-door laminoplasty: Clinical article.	Journal of Neurosurgery: Spine. 10 (6) (pp 551-556), 2009. Date of Publication: June 2009.		Object. Double-door laminoplasty using hydroxyapatite (HA) spacers has been widely performed for compressive cervical myelopathy and has provided good neurological outcome. Although HA spacers are used for preventing reclosure of the opened laminae, they are often displaced or dislocated from their original position. The authors investigated the incidence and patterns of postoperative HA spacer d…		Journal: Article
119	Tanaka N. Nakanishi K. Fujimoto Y. Sasaki H. Kamei N. Hamasaki T. Yamada K. Yamamoto R. Nakamae T. Ochi M.		(Tanaka, Nakanishi, Sasaki, Kamei, Hamasaki, Yamada, Yamamoto, Nakamae, Ochi) Department of Orthopaedic Surgery, Graduate School of Biomedical Sciences, Hiroshima University, Kasumi 1-2-3, Minami-ku, Hiroshima 734-8551, Japan (Fujimoto) Department of Orthopaedic Surgery, Hiroshima General Hospital, Hatsukaichi, Japan	Clinical results of cervical myelopathy in patients older than 80 years of age: Evaluation of spinal function with motor evoked potentials - Clinical article.	Journal of Neurosurgery: Spine. 11 (4) (pp 421-426), 2009. Date of Publication: October 2009.		Object. In this prospective analysis the authors describe the clinical results of surgical treatment in patients > 80 years of age in whom spinal function was evaluated with motor evoked potential (MEPs) monitoring. Methods. The authors included 57 patients > 80 years of age who were suspected of having cervical myelopathy. The mean age of the patients was 83.0 years (range 80-90 years). The cent…		Journal: Article
120	Uchida K. Nakajima H. Sato R. Yayama T. Mwaka E.S. Kobayashi S. Baba H.		(Uchida, Nakajima, Sato, Yayama, Mwaka, Kobayashi, Baba) Department of Orthopaedics and Rehabilitation Medicine, Fukui University, Faculty of Medical Sciences, Matsuoka Shimoaizuki 23-3, Eiheiji, Fukui 910-1193, Japan	Cervical spondylotic myelopathy associated with kyphosis or sagittal sigmoid alignment: Outcome after anterior or posterior decompression - Clinical article.	Journal of Neurosurgery: Spine. 11 (5) (pp 521-528), 2009. Date of Publication: November 2009.		Object. The effects of sagittal kyphotic deformities or mechanical stress on the development of cervical spondylotic myelopathy, or the reduction and fusion of kyphotic sagittal alignment have not been consistently documented. The aim in this study was to determine the effects of kyphotic sagittal alignment of the cervical spine in terms of neurological morbidity and outcome after 2 types of surg…		Journal: Article
121	Setzer M. Vrionis F.D. Hermann E.J. Seifert V. Marquardt G.		(Setzer, Hermann, Seifert, Marquardt) Department of Neurosurgery, J. W. Goethe University, Frankfurt am Main, Hannover, Germany (Setzer, Vrionis) Department of Neurosurgery, Hannover Medical School, Hannover, Germany (Hermann) Neuro-Oncology Program, H. Lee Moffitt Cancer Center and Research Institute, University of South Florida College of Medicine, Tampa, FL, United States	Effect of apolipoprotein E genotype on the outcome after anterior cervical decompression and fusion in patients with cervical spondylotic myelopathy: Clinical article.	Journal of Neurosurgery: Spine. 11 (6) (pp 659-666), 2009. Date of Publication: December 2009.		Object. The authors examined a possible association between apolipoprotein E (APOE) gene polymorphism and the outcome after anterior microsurgical decompression in patients with cervical spondylotic myelopathy (CSM). Methods. The authors conducted a prospective study of 60 consecutive patients (40 men, 20 women) with CSM who underwent anterior microsurgical decompression. The patients ranged in a…		Journal: Article
122	Singh A. Crockard H.A. Platts A. Stevens J.		(Singh, Crockard, Platts, Stevens) Department of Surgical Neurology, Natl. Hosp. for Neurol./Neurosurg., Queen Square, London WC1N 3BG, United Kingdom	Clinical and radiological correlates of severity and surgery-related outcome in cervical spondylosis.	Journal of Neurosurgery. 94 (2 SUPPL.) (pp 189-198), 2001. Date of Publication: 2001.	Object. The aim of this study was to determine if radiological features could be used to predict outcome in patients with cervical spondylotic myelopathy (CSM). Methods. The authors studied 69 patients consecutively referred to The National Hospital, Queen Square, for decompressive surgery. Data obtained from preoperative cervical spine magnetic resonance (MR) imaging studies were each analyzed o…	Journal: Article		2001
123	Mayr M.T. Subach B.R. Comey C.H. Rodts G.E. Haid Jr. R.W.		(Mayr, Subach, Comey, Rodts, Haid Jr.) Department of Neurological Surgery, Emory Clinic, Building B, 1365 Clifton Road, Atlanta, GA 30322, United States	Cervical spinal stenosis: Outcome after anterior corpectomy, allograft reconstruction, and instrumentation.	Journal of Neurosurgery. 96 (1 SUPPL.) (pp 10-16), 2002. Date of Publication: 2002.	Object. The authors undertook a retrospective single-institution review of 261 patients who underwent anterior cervical corpectomy, reconstruction with allograft fibula, and placement of an anterior plating system for the treatment of cervical spinal stenosis to assess fusion rates and procedure-related complications. Methods. Between October 1989 and June 1995, 261 patients with cervical stenosi…	Journal: Article		2002
124	Uchida K. Nakajima H. Sato R. Kokubo Y. Yayama T. Kobayashi S. Baba H.		(Uchida, Nakajima, Sato, Kokubo, Yayama, Kobayashi, Baba) Division of Orthopaedics and Rehabilitation Medicine, Department of Surgery, University of Fukui, 23 Shimoaizuki, Matsuoka, Fukui 910-1193, Japan	Multivariate analysis of the neurological outcome of surgery for cervical compressive myelopathy.	Journal of Orthopaedic Science. 10 (6) (pp 564-573), 2005. Date of Publication: November 2005.	Background. The neurological outcome of decompressive surgery for cervical myelopathy is influenced by several factors. Although each factor may have an independent effect, it is more likely that the outcome is influenced by more than one factor. We examined the results of multivariate analysis and multiple regression analysis of the neurological outcome of patients treated by cervical cord decom…	Journal: Article		2005
125	Fukui M. Chiba K. Kawakami M. Kikuchi S. Konno S. Miyamoto M. Seichi A. Shimamura T. Shirado O. Taguchi T. Takahashi K. Takeshita K. Tani T. Toyama Y. Yonenobu K. Wada E. Tanaka T. Hirota Y.		(Fukui, Chiba, Kawakami, Kikuchi, Konno, Miyamoto, Seichi, Shimamura, Shirado, Taguchi, Takahashi, Takeshita, Tani, Toyama, Yonenobu, Wada, Tanaka, Hirota) Department of Orthopedic Surgery, Faculty of Medicine, University of Tokyo, 7-3-1 Hongo, Bunkyo-ku, Tokyo 113-0033, Japan	Japanese Orthopaedic Association Cervical Myelopathy Evaluation Questionnaire: Part 3. Determination of reliability.	Journal of Orthopaedic Science. 12 (4) (pp 321-326), 2007. Date of Publication: July 2007.	Background. The manner of measuring the outcome of cervical myelopathy must be patient-oriented and have sufficient reliability and validity. The current Japanese Orthopaedic Association (JOA) scoring system for cervical myelopathy is widely used but has not met this requirement. The first- and second-round surveys established 24 items for inclusion on a new questionnaire for cervical myelopathy.…	Journal: Article		2007
126	Fukui M. Chiba K. Kawakami M. Kikuchi S. Konno S. Miyamoto M. Seichi A. Shimamura T. Shirado O. Taguchi T. Takahashi K. Takeshita K. Tani T. Toyama Y. Yonenobu K. Wada E. Tanaka T. Hirota Y.		(Fukui) Laboratory of Statistics, Osaka City University Faculty of Medicine, Osaka, Japan (Chiba, Toyama) Department of Orthopaedic Surgery, Keio University, 35 Shinanomachi, Shinjuku, Tokyo 160-8582, Japan (Kawakami) Department of Orthopaedic Surgery, Wakayama Medical University, Wakayama, Japan (Kikuchi, Konno) Department of Orthopaedic Surgery, School of Medicine, Fukushima Medical University,…	Japanese Orthopaedic Association Cervical Myelopathy Evaluation Questionnaire (JOACMEQ): Part 4. Establishment of equations for severity scores: Subcommittee on low back pain and cervical myelopathy, evaluation of the clinical outcome committee of the Japanese orthopaedic association.	Journal of Orthopaedic Science. 13 (1) (pp 25-31), 2008. Date of Publication: January 2008.		Background. To establish a patient-oriented outcome measure for cervical myelopathy, a subcommittee of the Japanese Orthopaedic Association (JOA) developed a new scoring system to evaluate the overall clinical status of patients, which could be completed by patients themselves. The subcommittee completed three large-scale studies to select and modify questions derived from various preexisting out…		Journal: Article
127	Tanaka N. Konno S.-I. Takeshita K. Fukui M. Takahashi K. Chiba K. Miyamoto M. Matsumoto M. Kasai Y. Kanamori M. Matsunaga S. Hosono N. Kanchiku T. Taneichi H. Hashizume H. Kanayama M. Shimizu T. Kawakami M.		(Tanaka) Department of Orthopaedic Surgery, Institute of Biomedical and Health Sciences, Hiroshima University, Kasumi 1-2-3, Minami-ku, Hiroshima 734-8551, Japan (Konno) Department of Orthopaedic Surgery, School of Medicine, Fukushima Medical University, Fukushima, Japan (Takeshita) Department of Orthopaedic Surgery, University of Tokyo, Tokyo, Japan (Fukui) Laboratory of Statistics, Osaka City U…	An outcome measure for patients with cervical myelopathy: The Japanese Orthopaedic Association Cervical Myelopathy Evaluation Questionnaire (JOACMEQ): An average score of healthy volunteers.	Journal of Orthopaedic Science. 19 (1) (pp 33-48), 2014. Date of Publication: January 2014.	Background: An outcome measure to evaluate the neurological function of patients with cervical myelopathy was proposed by the Japanese Orthopaedic Association (JOA score) and has been widely used in Japan. However, the JOA score does not include patients' satisfaction, disability, handicaps, or general health, which can be affected by cervical myelopathy. In 2007, a new outcome measure, the Japan…	Journal: Article		2014
128	Singh A. Crockard H.A.		(Singh, Crockard) Department of Surgical Neurology, National Hospital for Neurology and Neurosurgery, London, UK.	Comparison of seven different scales used to quantify severity of cervical spondylotic myelopathy and post-operative improvement.	Journal of outcome measurement. 5 (1) (pp 798-818), 2001. Date of Publication: 2001-2002.	Considerable uncertainty exists over the benefit that patients receive from surgical decompressive treatment for cervical spondylotic myelopathy (CSM). Such difficulties might be addressed by accurate quantification of CSM severity as part of a trial determining the outcome of surgery in different patient groups. This study compares the applicability of various existing quantitative severity scal…	Journal: Article		2001
129	Hasegawa K. Homma T. Chiba Y. Hirano T. Watanabe K. Yamazaki A.		(Hasegawa, Hirano, Watanabe) Division of Orthopaedic Surgery, Niigata Univ. Grad. Sch. Med. Sci., Shimotsuga General Hospital, Tochigi, Japan (Homma) Niigata Spine Center, Department of Orthopaedic Surgery, Shimotsuga General Hospital, Tochigi, Japan (Chiba) Department of Orthopaedic Surgery, Shimotsuga General Hospital, Tochigi, Japan (Yamazaki) Niigata Chuo Hospital, Niigata, Japan (Hasegawa) D…	Effects of surgical treatment for cervical spondylotic myelopathy in patients >70 years of age: A retrospective comparative study.	Journal of Spinal Disorders and Techniques. 15 (6) (pp 458-460), 2002. Date of Publication: December 2002.	The objective of this study was to compare efficacy of cervical surgery for myelopathy in patients 70 and 60 years of age. Forty patients 70 years and 50 patients 60 years of age with MRI and CT proven myelopathy were neurologically assessed using the JOA score. Three operative procedures were performed: anterior spinal fusion, laminoplasty, and laminectomy. Postoperatively, patients exhibited co…	Journal: Article		2002
130	Takahashi Y. Narusawa K. Shimizu K. Hijioka A. Nakamura T.		(Takahashi, Narusawa, Shimizu, Nakamura) Department of Orthopedic Surgery, School of Medicine, University of Occupational and Environmental Health, 1-1, Iseigaoka, Yahatanishiku, Kitakyusyu, Japan (Hijioka) Department of Orthopedic Surgery, Shinkokura Hospital, 1-3-1 Kaneda, Kokurakitaku, Kitakyusyu, Japan (Takahashi) Department of Orthopedic Surgery, University of Occupational and Environmental …	Enlargement of cervical spinal cord correlates with improvement of motor function in upper extremities after laminoplasty for cervical myelopathy.	Journal of Spinal Disorders and Techniques. 19 (3) (pp 194-198), 2006. Date of Publication: May 2006.	OBJECTIVE: The correlation between postoperative spinal cord enlargement at the most compressive disc level and clinical outcome is controversial. The relationship between spinal cord enlargement at neurologically symptomatic disc level and clinical recovery has not been explored. The purpose of this study was to clarify the relationship between postoperative spinal cord enlargement at neurologic…	Journal: Article		2006
131	Gok B. McLoughlin G.S. Sciubba D.M. McGirt M.J. Chaichana K.L. Wolinsky J.P. Bydon A. Gokaslan Z.L. Witham T.F.		(Gok, McLoughlin, Sciubba, McGirt, Chaichana, Wolinsky, Bydon, Gokaslan, Witham) Department of Neurosurgery, Johns Hopkins University, Baltimore, MD 21287, USA.	Surgical management of cervical spondylotic myelopathy with laminectomy and instrumented fusion.	Neurological research. 31 (10) (pp 1097-1101), 2009. Date of Publication: Dec 2009.		OBJECTIVE: The indications for treating cervical spondylotic myelopathy (CSM) with laminectomy and instrumented fusion remain ill-defined. Cervical laminectomy without instrumented fusion has been associated with suboptimal outcomes, particularly in the setting of cervical kyphosis. This work's purpose is to retrospectively review our experience in patients who underwent laminectomy with instrume…		Journal: Article
132	Zong Y. Xue Y. Zhao Y. Ding H. He D. Li Z. Tang Y. Wang Y.		(Zong, Xue, Ding, He, Li, Tang, Wang) Department of Orthopaedics Surgery, Tianjin Medical University General Hospital, Anshan Road No. 154, Heping District, Tianjin 300052, China (Zhao) Tianjin Medical University, Qixiangtai Road No. 22, Heping District, Tianjin 300070, China	Depression contributed an unsatisfactory surgery outcome among the posterior decompression of the cervical spondylotic myelopathy patients: A prospective clinical study.	Neurological Sciences. 35 (9) (pp 1373-1379), 2014. Date of Publication: September 2014.	Posterior decompression surgery was performed on 610 patients (mean age 62 years) with clinically and radiologically defined cervical spondylotic myelopathy (CSM) at Tianjin Medical University General Hospital, between October 2007 and October 2011. After 2-year follow-up, we had a full data sets from 396 patients with normal mood or continued depression during the whole process to be compared. D…	Journal: Article		2014
133	Yadav Y.R. Parihar V. Ratre S. Kher Y. Bhatele P.R.		(Yadav, Parihar, Ratre, Kher) Department of Neurosurgery, Netaji Subhash Chandra Bose Medical College, 105 Nehru Nagar Opposite Medical College, Jabalpur 482 003, India (Bhatele) Department of Radio-Diagnosis, Madhya Pradesh Magnetic Resonance Imaging Center, Jabalpur, India	Endoscopic decompression of cervical spondylotic myelopathy using posterior approach.	Neurology India. 62 (6) (pp 640-645), 2014. Date of Publication: 01 Nov 2014.	Background: Cervical spondylotic myelopathy, radiculopathy and myeloradiculopathy can be managed by laminoforaminotomy, or bilateral decompression using posterior approach in single or multilevel compression. Posterior endoscopic techniques allow preservation of motion segment and neural decompression without fusion.Materials and Methods: A prospective study of 50 patients of cervical compressive…	Journal: Article		2014
134	Gocmez C. Koc R.K. Tucer B. Menku A. Kurtsoy A.		(Gocmez) Department of Neurosurgery, Faculty of Medicine, Dicle University, Diyarbakir 21270, Turkey (Koc, Tucer, Menku, Kurtsoy) Department of Neurosurgery, Faculty of Medicine, Erciyes University, Kayseri, Turkey	Prognostic factors in cervical spondylotic myelopathy: A clinical prospective study.	Neurosurgery Quarterly. 25 (1) (pp 34-40), 2015. Date of Publication: 27 Feb 2015.	Objective: Various factors may affect the surgical outcome in patients with cervical spondylotic myelopathy (CSM). The purpose of the present study was to determine these factors based on preoperative radiologic and clinical data. Methods: A total of 50 patients who underwent surgery for CSM and were followed up for at least 12 months postoperatively were enrolled in the study. The patients' preo…	Journal: Article		2015
135	King Jr. J.T. McGinnis K.A. Roberts M.S. Angevine P.D. McCormick P.C. Benzel E.C. Sonntag V.K.H. Wolfla C.E. Klara P.M.			Quality of life assessment with the Medical Outcomes Study Short Form-36 among patients with cervical spondylotic myelopathy.	Neurosurgery. 52 (1) (pp 113-121), 2003. Date of Publication: 01 Jan 2003.	OBJECTIVE: Cervical spondylotic myelopathy (CSM) is a chronic degenerative condition of the cervical spine that produces narrowing of the spinal canal and disruption of spinal cord function. We used Medical Outcomes Study Short Form-36 (SF-36), a generic quality of life outcome-assessment instrument, to assess the quality of life among patients with CSM. METHODS: A cohort of 88 Veterans Administr…	Journal: Article		2003
136	Rajshekhar V. Arunkumar M.J. Kumar S.S. Cooper P.R. Traynelis V.C. Papadopoulos S.M. Benzel E.C. Marquardt G. Seifert V.		(Rajshekhar, Arunkumar, Kumar) Department of Neurological Sciences, Christian Medical College Hospital, Vellore 632004, India	Changes in cervical spine curvature after uninstrumented one- and two-level corpectomy in patients with spondylotic myelopathy.	Neurosurgery. 52 (4) (pp 799-805), 2003. Date of Publication: 01 Apr 2003.	OBJECTIVE: We studied changes in the cervical spine curvature in patients with cervical spondylotic myelopathy who underwent one- or two-level central corpectomy and iliac bone grafting without the use of instrumentation. METHODS: Curvature of the fused segment and of the whole cervical spine was evaluated on preoperative and follow-up x-rays in 93 patients (30 underwent one-level corpectomy, and…	Journal: Article		2003
137	Steinmetz M.P. Patel R. Traynelis V. Resnick D.K. Anderson P.A.		(Steinmetz) Center for Spine Health, Cleveland Clinic Foundation, Cleveland, OH, United States (Patel) Orthopedic Associates of Long Island, East Setauket, NY, United States (Traynelis) Department of Neurosurgery, University of Iowa, Iowa City, IA, United States (Resnick) Department of Neurosurgery, University of Wisconsin, Madison, WI, United States (Anderson) Department of Orthopedics and Rehab…	Cervical disc arthroplasty compared with fusion in a workers' compensation population.	Neurosurgery. 63 (4) (pp 741-747), 2008. Date of Publication: October 2008.		OBJECTIVE: Patients with cervical radiculopathy and/or myelopathy are often treated with anterior cervical discectomy and fusion. Cervical arthroplasty has recently been advocated as an alternative treatment. Theoretically, arthroplasty should permit early return to activity and protect against adjacent segment disease. Early mobilization and return to activity may, theoretically, reduce cost to …		Journal: Article
138	Ghogawala Z. Benzel E.C. Heary R.F. Riew K.D. Albert T.J. Butler W.E. Barker F.G. Heller J.G. McCormick P.C. Whitmore R.G. Freund K.M. Schwartz J.S.		(Ghogawala) Department of Neurosurgery, Alan and Jacqueline Stuart Spine Center, Tufts University School of Medicine, 41 Mall Rd, Burlington, MA 01805, United States (Benzel) Massachusetts Wallace Trials Center, School of Medicine, Tufts University, Boston, CT, United States (Heary) Department of Neurosurgery, Center for Spine Health, Cleveland Clinic Foundation, Cleveland, OH, United States (Rie…	Cervical spondylotic myelopathy surgical trial: Randomized, controlled trial design and rationale.	Neurosurgery. 75 (4) (pp 334-346), 2014. Date of Publication: 2014.	BACKGROUND: Cervical spondylotic myelopathy (CSM) is the most common cause of spinal cord dysfunction in the world. There are significant practice variation and uncertainty as to the optimal surgical approach for treating CSM. OBJECTIVE: To determine whether ventral surgery is associated with superior Short Form- 36 Physical Component Summary outcome at the 1-year follow-up compared with dorsal (…	Journal: Article		2014
139	Hu W. Shen X. Sun T. Zhang X. Cui Z. Wan J.		(Hu, Shen, Sun, Zhang, Cui, Wan) Department of Orthopedics, Tianjin Union Medical Center, 190 Jieyuan Rd., Tianjin, 300121, China	Laminar reclosure after single open-door laminoplasty using titanium miniplates versus suture anchors.	Orthopedics. 37 (1) (pp e71-e78), 2014. Date of Publication: January 2014.	Laminar closure is associated with expansive open-door laminoplasty. Suture anchor fixation and titanium miniplate fixation are used to prevent laminar reclosure. However, few studies have compared the clinical effects of the 2 fixation methods. The authors performed a prospective study of 55 patients with cervical spondylotic myelopathy who underwent single open-door laminoplasty with suture anc…	Journal: Article		2014
140	Wang Z.-C. Hou X.-W. Shao J. Ji Y.-J. Li L. Zhou Q. Yu S.-M. Mao Y.-L. Zhang H.-J. Zhang P.-C. Lu H.		(Wang, Zhou, Yu, Mao, Zhang, Zhang) Department of Orthopedics, Xinhua Hospital (Chongming), Shanghai Jiaotong University, Shanghai, China (Hou) Department of Cardiology, Hangzhou Hospital, Nanjing Medical University and Hangzhou First Municipal Hospital, Hangzhou, China (Shao, Lu) Department of Orthopedics, Xinhua Hospital, Shanghai Jiaotong University, Shanghai, China (Ji) Department of Internal…	Hif-1a polymorphism in the susceptibility of cervical spondylotic myelopathy and its outcome after anterior cervical corpectomy and fusion treatment.	PLoS ONE. 9 (11) , 2014. Article Number: e110862. Date of Publication: 17 Nov 2014.	Method: A total of 230 CSM patients and 284 healthy controls were recruited. All patients received anterior cervical corpectomy and fusion (ACF) and were followed for 12 months. The genotypes for two HIF-1a variants ( 1772C.T and 1790G.A ) were determined. Background: To investigate the association between the single nucleotide polymorphism (SNP) of hypoxia-inducible factor1 a (HIF-1a) and the su…	Journal: Article		2014
141	Chen C.-J. Lyu R.-K. Lee S.-T. Wong Y.-C. Wang L.-J.		(Chen, Lyu, Lee, Wong, Wang) 2nd, Dept. of Diagnostic Radiology, Chang Gung Memorial Hospital, 199 Tung-Hwa North Rd, Taipei, Taiwan (Republic of China)	Intramedullary high signal intensity on T2-weighted MR images in cervical spondylotic myelopathy: Prediction of prognosis with type of intensity.	Radiology. 221 (3) (pp 789-794), 2001. Date of Publication: 2001.	PURPOSE: To examine whether the different appearances of intramedullary high signal intensity (SI) on T2-weighted MR images in cervical spondylotic myelopathy are related to differences in surgical prognosis. MATERIALS AND METHODS: The magnetic resonance (MR) findings and Japanese Orthopedic Association (JOA) score of 64 cervical spondylotic myelopathy patients, who underwent decompression surger…	Journal: Article		2001
142	Wen C.Y. Cui J.L. Liu H.S. Mak K.C. Cheung W.Y. Luk K.D.K. Hu Y.		(Wen, Cui, Liu, Mak, Cheung, Luk, Hu) Department of Orthopaedics and Traumatology, Li Ka Shing Faculty of Medicine, University of Hong Kong, 12 Sandy Bay Rd, Pokfulam, Hong Kong	Is diffusion anisotropy a biomarker for disease severity and surgical prognosis of cervical spondylotic myelopathy.	Radiology. 270 (1) (pp 197-204), 2014. Date of Publication: January 2014.	Purpose: To explore the value of diffusion-tensor (DT) imaging in addressing the severity of cervical spondylotic myelopathy (CSM) and predicting the outcome of surgical treatment. Materials and Methods: From July 2009 to May 2012, 65 volunteers were recruited for this institutional review board-approved study, and all gave informed consent; 20 volunteers were healthy subjects (age range, 41-62 y…	Journal: Article		2014
143	Xiao Y.-Y. Tian J.L. Li J.K. Zhang J.S.		(Xiao, Tian, Li, Zhang) Department of Radiology, Chinese PLA General Hospital, Beijing 100853, China	CT-guided ozone injection for the treatment of cervical disc herniation.	Rivista Italiana di Ossigeno-Ozonoterapia. 5 (2) (pp 109-114), 2006. Date of Publication: October 2006.	We evaluated the therapeutic outcome of CT-guided ozone treatment for cervical disc herniation. All 86 patients with cervical spondylosis including myelopathy (37 cases), radiculopathy (30 cases), and sympathetic type (19 cases) were treated with ozone injection under CT guidance. The puncture route was anterolateral from the neck to the disk. A total of 2-7 ml of ozone at a concentration of 60 m…	Journal: Article		2006
144	Arnold P.M. Fehlings M.G. Kopjar B. Yoon S.T. Massicotte E.M. Vaccaro A.R. Brodke D.S. Shaffrey C.I. Smith J.S. Woodard E.J. Banco R.J. Chapman J.R. Janssen M.E. Bono C.M. Sasso R.C. Dekutoski M.B. Gokaslan Z.L.		(Arnold) Department of Neurosurgery, University of Kansas Medical Center, Mail Stop 3021, 3901 Rainbow Blvd., Kansas City, KS 66160, United States (Fehlings, Massicotte) Division of Neurosurgery, University of Toronto, Toronto, ON, Canada (Fehlings, Massicotte) Toronto Western Hospital, 399 Bathurst St, #4W-449, Toronto, ON, Canada (Kopjar) Department of Health Services, University of Washington,…	Mild diabetes is not a contraindication for surgical decompression in cervical spondylotic myelopathy: Results of the AOSpine North America multicenter prospective study (CSM).	Spine Journal. 14 (1) (pp 65-72), 2014. Date of Publication: 01 Jan 2014.	Background context Cervical spondylotic myelopathy (CSM) is a chronic spinal cord disease and can lead to progressive or stepwise neurologic decline. Several factors may influence this process, including extent of spinal cord compression, duration of symptoms, and medical comorbidities. Diabetes is a systemic disease that can impact multiple organ systems, including the central and peripheral ner…	Journal: Article		2014
145	Tetreault L.A. Cote P. Kopjar B. Arnold P. Fehlings M.G.		(Tetreault, Fehlings) Toronto Western Hospital, University Health Network, University of Toronto, 399 Bathurst St, Toronto, ON M5T2S8, Canada (Cote) Faculty of Health Sciences, University of Ontario Institute of Technology (UOIT), 2000 Simcoe Street North, Oshawa, ON L1H 7K4, Canada (Cote) Centre for the Study of Disability Prevention and Rehabilitation, Canadian Memorial Chiropractic College (CM…	A clinical prediction model to assess surgical outcome in patients with cervical spondylotic myelopathy: Internal and external validations using the prospective multicenter AOSpine North American and international datasets of 743 patients.	Spine Journal. 15 (3) (pp 388-397), 2015. Date of Publication: 01 Mar 2015.	Background context Clinical prediction rules are valuable tools in a surgical setting but should not be used to guide clinical practice until validated in other populations. Purpose The objective of this study was to validate a clinical prediction rule developed to determine surgical outcome in patients with cervical spondylotic myelopathy (CSM). The study will also identify key clinical predicto…	Journal: Article		2015
146	Shiraishi T.		(Shiraishi) Department of Orthopaedic Surgery, National Tochigi Hospital, 1-10-37, Nakatomatsuri, Utsunomiya, Tochigi, 320-0057, Japan (Shiraishi) Department of Orthopaedic Surgery, Saiseikai Utsunomiya Hospital, 911-1, Takebayashi-Cho, Utsunomiya, Tochigi, 321-0974, Japan	Skip laminectomy - A new treatment for cervical spondylotic myelopathy, preserving bilateral muscular attachments to the spinous processes: A preliminary report.	Spine Journal. 2 (2) (pp 108-115), 2002. Date of Publication: 04 Mar 2002.	Background context: Techniques in current use for expansive laminoplasty operations (ELAP) on the cervical spine damage the extensor mechanisms, resulting in restriction of neck motion, loss of lordosis and persistent axial pains. Purpose: This article introduces a new surgical technique called skip laminectomy, which reduces morbidity after decompression of the cervical spinal canal. Study desig…	Journal: Article		2002
147	Suri A. Chabbra R.P.S. Mehta V.S. Gaikwad S. Pandey R.M.		(Suri, Chabbra, Mehta) Department of Neurosurgery, All India Institute of Medical Sci., Ansari Nagar, New Delhi 110029, India (Gaikwad) Department of Neuroradiology, All India Institute of Medical Sci., Ansari Nagar, New Delhi 110029, India (Pandey) Department of Biostatistics, All India Institute of Medical Sci., Ansari Nagar, New Delhi 110029, India (Suri) Alaknanda, Kalkaji, New Delhi 110019, …	Effect of intramedullary signal changes on the surgical outcome of patients with cervical spondylotic myelopathy.	Spine Journal. 3 (1) (pp 33-45), 2003. Date of Publication: January/February 2003.	Background context: Intramedullary signal intensity changes on magnetic resonance imaging (MRI) in cervical spondylotic myelopathy are thought to be indicative of the prognosis. However, the prognostic significance of signal intensity changes remains controversial. Purpose: To determine the radiographic and clinical factors that correlate with the prognosis after surgery in patients with cervical…	Journal: Article		2003
148	Sampath P. Bendebba M. Davis J.D. Ducker T.B.		(Sampath, Bendebba, Davis, Ducker) Department of Neurological Surgery, Johns Hopkins School of Medicine, Baltimore, MD, United States (Sampath) Hunterian Neurosurgical Laboratory, Johns Hopkins School of Medicine, Hunterian 817, Baltimore, MD 21205, United States	Outcome of patients treated for cervical myelopathy: A prospective, multicenter study with independent clinical review.	Spine. 25 (6) (pp 670-676), 2000. Date of Publication: 15 Mar 2000.	Study Design. This Cervical Spine Research Society (CSRS) Study is a prospective, multicenter, nonrandomized investigation of patients with cervical spondylosis and disc disease. In this analysis, only patients with cervical myelopathy as the predominant syndrome were considered. Objectives. To determine demographics, surgeon treatment practices, and outcomes in patients with symptomatic myelopat…	Journal: Article		2000
149	Kamizono J. Matsunaga S. Hayashi K. Shinkura R. Koriyama C. Sakou T. Komiya S.		(Kamizono, Matsunaga, Hayashi, Komiya) Department of Orthopaedic Surgery, Faculty of Medicine, Kagoshima University, Kagoshima, Japan (Shinkura, Koriyama) Department of Public Health, Faculty of Medicine, Kagoshima University, Kagoshima, Japan (Sakou) Sakou Orthopaedic Clinic, Kagoshima, Japan (Matsunaga) Department of Orthopaedic Surgery, Faculty of Medicine, Kagoshima University, 8-35-1, Sakura…	Occupational recovery after open-door type laminoplasty for patients with ossification of the posterior longitudinal ligament.	Spine. 28 (16) (pp 1889-1892), 2003. Date of Publication: 15 Aug 2003.	Study Design. A cross-sectional survey of occupational recovery after surgery with patients who had ossification of the posterior longitudinal ligament. Objectives. To evaluate occupational recovery after open-door type laminoplasty for patients with ossification of the posterior longitudinal ligament. Summary of Background Data. The literature contains numerous reports on the surgical results of…	Journal: Article		2003
150	King Jr. J.T. Tsevat J. Moossy J.J. Roberts M.S.		(King Jr., Moossy) Section of Neurosurgery, Surgical Service Line, Vet. Aff. Pittsburgh Hlthcare. Syst. (King Jr., Moossy) Department of Neurological Surgery, University of Pittsburgh, Pittsburgh, PA, United States (King Jr.) Ctr. for Health Equity and Promotion, Vet. Aff. Pittsburgh Hlthcare. Syst. (King Jr., Roberts) Div. of General Internal Medicine, Department of Medicine, University of Pitts…	Preference-based quality of life measurement in patients with cervical spondylotic myelopathy.	Spine. 29 (11) (pp 1271-1280), 2004. Date of Publication: 01 Jun 2004.	Study Design. Prospective cross-sectional observational cohort study. Objectives. To assess the performance of preference-based quality of life (QOL) instruments in patients with cervical spondylotic myelopathy (CSM). Summary of Background Data. Generic health status instruments (e.g., SF-36) or disease-specific health status measures (e.g., myelopathy scales) are typically used to measure QOL in…	Journal: Article		2004
151	Kienapfel H. Koller M. Hinder D. Georg C. Pfeiffer M. Klose K.J. Lorenz W. Griss P.		(Kienapfel, Hinder, Pfeiffer, Griss) Department of Orthopedic Surgery, Philipps University, Marburg, Germany (Koller, Lorenz) Institute for Theoretical Surgery, Philipps University, Marburg, Germany (Georg, Klose) Department of Diagnostic Radiology, Philipps University, Marburg, Germany (Kienapfel) Klinik fur Orthopadie Facharzt, Zentrum fur Endoprothetik, Auguste Viktoria Klinikum, Rubensstr. 12…	Integrated outcome assessment after anterior cervical discectomy and fusion: Myelocompression but not adjacent instability affect patient-reported quality of life and cervical spine symptoms.	Spine. 29 (22) (pp 2501-2509), 2004. Date of Publication: 15 Nov 2004.	Study Design. The authors conducted a cross-sectional study. Objective. Integrated assessment of adjacent instability (AI), myelocompression (MC), magnetic resonance imaging (MRI) signs of myelopathy (MRISM), physician-assessed clinical signs and symptoms, including clinical signs of myelopathy (CSM), patients' self-reported symptoms and quality of life after anterior cervical discectomy and fusi…	Journal: Article		2004
152	Takayama H. Muratsu H. Doita M. Harada T. Yoshiya S. Kurosaka M.		(Takayama, Harada) Department of Orthopaedic Surgery, Hyogo Prefectural Kakogawa Hospital, Kakogawa, Japan (Muratsu, Doita, Yoshiya, Kurosaka) Department of Orthopaedic Surgery, Kobe Univ. Grad. School of Medicine, Kobe City, Japan (Doita) 7-5-1 Kusunoki-cho, Chuo-ku, Kobe 650-0017, Japan	Impaired joint proprioception in patients with cervical myelopathy.	Spine. 30 (1) (pp 83-86), 2005. Date of Publication: 01 Jan 2005.	Study Design. Prospective clinical study. Objectives. To evaluate impairment of proprioception quantitatively in patients with cervical myelopathy. Summary of Background Data. Sensory information regarding proprioception ascends through the posterior columns in the spinal cord. Damage to these columns causes proprioceptive loss in patients with spondylotic myelopathy. Nevertheless, there have bee…	Journal: Article		2005
153	Doita M. Sakai H. Harada T. Nishida K. Miyamoto H. Kaneko T. Kurosaka M.		(Doita, Nishida, Miyamoto, Kurosaka) Department of Orthopedic Surgery, Kobe University, Graduate School of Medicine, Kobe, Japan (Sakai) Department of Physical Medicine and Rehabilitation, Kobe University, Graduate School of Medicine, Kobe, Japan (Harada) Department of Orthopedic Surgery, Hyogo Prefectural Kakogawa Hospital, Kakogawa, Japan (Kaneko) Department of Physical Medicine and Rehabilitat…	The influence of proprioceptive impairment on hand function in patients with cervical myelopathy.	Spine. 31 (14) (pp 1580-1584), 2006. Date of Publication: June 2006.	STUDY DESIGN. A prospective clinical study. OBJECTIVES. To quantitatively evaluate hand function in patients with cervical myelopathy and to assess the influence of proprioceptive impairment on hand function in patients with cervical myelopathy. SUMMARY OF BACKGROUND DATA. Clumsiness of the hands is one of the most common complaints in patients with cervical myelopathy. However, few reports have …	Journal: Article		2006
154	Ying Z. Xinwei W. Jing Z. Shengming X. Bitao L. Tao Z. Wen Y.		(Ying, Xinwei, Jing, Shengming, Bitao, Tao, Wen) Department of Orthopedics Changzheng Hospital, Second Military Medical University of China, Shanghai, China (Wen) Department of Orthopedics, Changzheng Hospital, Second Military Medical University of China, 415 Fengyang Road, Shanghai 200003, China	Cervical corpectomy with preserved posterior vertebral wall for cervical spondylotic myelopathy: A randomized control clinical study.	Spine. 32 (14) (pp 1482-1487), 2007. Date of Publication: June 2007.	STUDY DESIGN. Cervical corpectomy with preserved posterior vertebral wall (CPW) had been performed by the senior author (Y.W.) since 1999. A prospective study had been conducted to evaluate the efficacy of CPW since 2001. OBJECTIVE. To validate the clinical outcome of CPW against conventional corpectomy (CC). SUMMARY OF BACKGROUND DATA. Anterior surgical managements of cervical spondylotic myelop…	Journal: Article		2007
155	Yukawa Y. Kato F. Yoshihara H. Yanase M. Ito K.		(Yukawa, Kato, Yoshihara, Yanase, Ito) Department of Orthopedic Surgery, Chubu Rosai Hospital, Nagoya, Japan (Yukawa) Department of Orthopedic Surgery, Chubu Rosai Hospital, Nagoya, Aichi 455-0830, Japan	MR T2 image classification in cervical compression myelopathy: Predictor of surgical outcomes.	Spine. 32 (15) (pp 1675-1678), 2007. Date of Publication: July 2007.	STUDY DESIGN. Prospective imaging study of patients undergoing surgery for cervical compressive myelopathy. OBJECTIVES. To investigate whether the classification of increased signal intensity (ISI) on magnetic resonance imaging (MRI) in patients with cervical compressive myelopathy reflects the severity of symptoms and surgical outcome. SUMMARY OF BACKGROUND DATA. The association between ISI and …	Journal: Article		2007
156	Mihara H. Kondo S. Takeguchi H. Kohno M. Hachiya M.		(Mihara, Kondo, Takeguchi, Kohno, Hachiya) Department of Orthopaedic Surgery, Yokohama Minami Kyosai Hospital, Yokohama, Japan (Mihara) Department of Orthopaedic Surgery, Yokohama Minami Kyosai Hospital, 1-21-1 Mutu-ura Higashi, Kanazawa, Yokohama, 236-0032, Japan	Spinal cord morphology and dynamics during cervical laminoplasty: Evaluation with intraoperative sonography.	Spine. 32 (21) (pp 2306-2309), 2007. Date of Publication: October 2007.	STUDY DESIGN. An intraoperative sonographic study for evaluating spinal cord decompression status was conducted. OBJECTIVES. To analyze the spinal cord decompression status using intraoperative sonography and to evaluate the relation to postoperative neurologic recovery following cervical laminoplasty. SUMMARY OF BACKGROUND DATA. Since the 1980s, several papers have introduced that the intraopera…	Journal: Article		2007
157	Shimomura T. Sumi M. Nishida K. Maeno K. Tadokoro K. Miyamoto H. Kurosaka M. Doita M.		(Shimomura, Nishida, Maeno, Kurosaka, Doita) Department of Orthopaedic Surgery, Kobe University, Graduate School of Medicine, Kobe, Japan (Sumi) Department of Orthopaedic Surgery, Japan Labour Health and Welfare Organization, Kobe Rosai Hospital, Kobe, Japan (Tadokoro, Miyamoto) Department of Orthopaedic Surgery, National Hospital Organization, Kobe Medical Center, Kobe, Japan (Shimomura) Departm…	Prognostic factors for deterioration of patients with cervical spondylotic myelopathy after nonsurgical treatment.	Spine. 32 (22) (pp 2474-2479), 2007. Date of Publication: October 2007.	STUDY DESIGN. A prospective study involving 56 patients with cervical spondylotic myelopathy (CSM) was conducted. OBJECTIVE. To investigate the outcomes and prognostic factors for CSM after nonsurgical treatment. SUMMARY OF BACKGROUND DATA. The superiority of surgical treatment over nonsurgical treatment has not been confirmed in mild forms of CSM. Outcomes and prognostic factors for nonsurgical …	Journal: Article		2007
158	Suk K.-S. Kim K.-T. Lee J.-H. Lee S.-H. Lim Y.-J. Kim J.-S.		(Suk, Kim, Lee, Lee, Lim, Kim) Department of Orthopaedic Surgery, Kyung Hee University College of Medicine, Seoul, South Korea (Suk) Department of Orthopaedic Surgery, Kyung Hee University College of Medicine, #1 Heokidong Dondamunku, Seoul, South Korea	Sagittal alignment of the cervical spine after the laminoplasty.	Spine. 32 (23) (pp E656-E660), 2007. Date of Publication: November 2007.	STUDY DESIGN. Prospective study. OBJECTIVE. To identify the impact of laminoplasty on range of motion (ROM) and sagittal alignment of the cervical spine. SUMMARY OF BACKGROUND DATA. Cervical laminoplasty is an effective procedure decompressing multilevel spinal cord compression. Preoperative lordosis of the cervical spine is a prerequisite for laminoplasty, and maintaining postoperative lordosis …	Journal: Article		2007
159	Takahashi J. Hirabayashi H. Hashidate H. Ogihara N. Yamazaki I. Kamimura M. Ebara S. Kato H.		(Takahashi, Hirabayashi, Hashidate, Ogihara, Kato) Department of Orthopaedic Surgery, Shinshu University, School of Medicine, Matsumoto-city, Nagano, Japan (Yamazaki) Department of Orthopaedic Surgery, Nagano Matsushiro Hospital, Matsushiro-town, Nagano-city, Nagano, Japan (Kamimura) Kamimura Clinic, Kotobuki Toyooka, Matsumoto-city, Nagano, Japan (Ebara) Department of Orthopaedic Surgery, Chigas…	Assessment of cervical myelopathy using transcranial magnetic stimulation and prediction of prognosis after laminoplasty.	Spine. 33 (1) (pp E15-E20), 2008. Date of Publication: January 2008.		STUDY DESIGN. This study investigated the clinical usefulness of motor-evoked potentials (MEPs) produced by transcranial magnetic stimulation of the brain for cervical myelopathy patients. OBJECTIVE. The purpose of this study was to determine the usefulness of MEPs for the assessment of the severity of myelopathy and prediction of the outcome of laminoplasty. SUMMARY OF BACKGROUND DATA. Magnetic …		Journal: Article
160	Hu Y. Ding Y. Ruan D. Wong Y.W. Cheung K.M.C. Luk K.D.K.		(Hu, Wong, Cheung, Luk) Department of Orthopaedics and Traumatology, University of Hong Kong, Pokfulam, Hong Kong, Hong Kong (Ding, Ruan) Department of Orthopedic Surgery, Navy General Hospital, Beijing, China (Hu) Department of Orthopaedics and Traumatology, University of Hong Kong, Duchess of Kent Children's Hospital, 12 Sandy Bay Road, Pokfulam, Hong Kong, Hong Kong	Prognostic value of somatosensory-evoked potentials in the surgical management of cervical spondylotic myelopathy.	Spine. 33 (10) (pp E305-E310), 2008. Date of Publication: May 2008.		STUDY DESIGN. Preoperative somatosensory-evoked potentials (SEPs) were retrospectively analyzed and classified, and compared with surgical outcome. OBJECTIVE. To evaluate the value of the preoperative SEP waveform in predicting the clinical outcome after surgical management of cervical spondylotic myelopathy (CSM). SUMMARY OF BACKGROUND DATA. SEPs have played an important role in spinal surgery. …		Journal: Article
161	Anderson P.A. Subach B.R. Riew K.D.		(Anderson) Department of Orthopedic Surgery and Rehabilitation, University of Wisconsin, 600 Highland Ave K4/736, Madison, WI 53792, United States (Subach) Virginia Spine Institute, Reston, VA, United States (Riew) Department of Orthopaedic Surgery, Washington University, St. Louis, MO, United States	Predictors of outcome after anterior cervical discectomy and fusion: A multivariate analysis.	Spine. 34 (2) (pp 161-166), 2009. Date of Publication: 15 Jan 2009.		STUDY DESIGN. Retrospective cohort study. OBJECTIVE. Perform a multivariate analysis to identify important predictors of poor outcome following anterior cervical discectomy and fusion. SUMMARY OF BACKGROUND DATA. Identifying prognostic factors is important to aid surgical decision-making and counseling of patients. Recent randomized control trials of disc arthroplasty devices have established a l…		Journal: Article
162	Suzuki A. Misawa H. Simogata M. Tsutsumimoto T. Takaoka K. Nakamura H.		(Suzuki, Takaoka) Department of Orthopaedic Surgery, Osaka City University, Graduate School of Medicine, Osaka, Japan (Misawa, Simogata, Tsutsumimoto) Spine Center, National Insurance Yodakubo Hospital, Nagano, Japan (Nakamura) Department of Orthopaedic Surgery, Osaka City General Hospital, Osaka, Japan	Recovery process following cervical laminoplasty in patients with cervical compression myelopathy: Prospective cohort study.	Spine. 34 (26) (pp 2874-2879), 2009. Date of Publication: December 2009.		Study Design: Prospective cohort study. Objective: To investigate the recovery process after laminoplasty in patients with cervical myelopathy, and the effects of patient age and duration of symptoms before surgery on the recovery process. Summary of Background Data: The surgical results of laminoplasty for cervical myelopathy have been well documented, but there have been few reports on the reco…		Journal: Article
163	Kasis A.G. Marshman L.A.G. Krishna M. Bhatia C.K.		(Kasis, Marshman, Krishna, Bhatia) Department of Spinal Surgery, University Hospital of North Tees, Hardwick, Stockton, North Tees TS19 8PE	Significantly improved outcomes with a less invasive posterior lumbar interbody fusion incorporating total facetectomy.	Spine. 34 (6) (pp 572-577), 2009. Date of Publication: 15 Mar 2009.		STUDY DESIGN.: Original study. OBJECTIVE.: Prospective comparison of clinical outcomes after a standard posterior lumbar interbody fusion (ST-PLIF) and after a limited exposure PLIF incorporating total facetectomy (LI-PLIF). SUMMARY OF BACKGROUND DATA.: Most groups have reported significantly improved clinical outcomes after ST-PLIF. To our knowledge, however, a comparison of outcomes between ST-…		Journal: Article
164	Karpova A. Arun R. Kalsi-Ryan S. Massicotte E.M. Kopjar B. Fehlings M.G.		(Karpova, Arun, Kalsi-Ryan, Massicotte) Krembil Neuroscience Centre, Toronto Western Hospital, Toronto, ON, Canada (Massicotte, Fehlings) Division of Neurosurgery, University of Toronto, Toronto, ON, Canada (Kopjar) School of Public Health, University of Washington, Seattle, United States (Fehlings) Department of Surgery, Neural Repair and Regeneration, University Health Network, 399 Bathurst St,…	Do quantitative magnetic resonance imaging parameters correlate with the clinical presentation and functional outcomes after surgery in cervical spondylotic myelopathy? A prospective multicenter study.	Spine. 39 (18) (pp 1488-1497), 2014. Date of Publication: 15 Aug 2014.	STUDY DESIGN.: A prospective multicenter cohort study. OBJECTIVE.: To establish the relationship between preoperative quantitative magnetic resonance imaging (MRI) parameters and clinical presentation and postoperative outcomes in patients with cervical spondylotic myelopathy. SUMMARY OF BACKGROUND DATA.: Correlation of magnetic resonance imaging with clinical presentation and outcomes in cervica…	Journal: Article		2014
165	MacHino M. Yukawa Y. Ito K. Inoue T. Kobayakawa A. Matsumoto T. Ouchida J. Tomita K. Kato F.		(MacHino, Yukawa, Ito, Inoue, Kobayakawa, Matsumoto, Ouchida, Tomita, Kato) Department of Orthopedic Surgery, Chubu Rosai Hospital, Japan Labor Health and Welfare Organization, 1-10-6 Komei, Minato-ku Nagoya, Aichi 455-8530, Japan	Impact of diabetes on the outcomes of cervical laminoplasty: A prospective cohort study of more than 500 patients with cervical spondylotic myelopathy.	Spine. 39 (3) (pp 220-227), 2014. Date of Publication: 01 Feb 2014.	STUDY DESIGN.: A prospective cohort study. OBJECTIVE.: This study aimed to compare the outcome of cervical laminoplasty between diabetic patients and nondiabetic patients with cervical spondylotic myelopathy. SUMMARY OF BACKGROUND DATA.: A few retrospective studies have investigated the outcomes of cervical myelopathy in diabetic patients; therefore, our large-scale cohort study was designed to a…	Journal: Article		2014
166	Nakashima H. Kato F. Yukawa Y. Imagama S. Ito K. Machino M. Ishiguro N.		(Nakashima, Kato, Yukawa, Imagama, Ito, Machino, Ishiguro) *Department of Orthopedic Surgery, Nagoya University Graduate School of Medicine, Nagoya, Japan; and +Department of Orthopedic Surgery, Chubu Rosai Hospital, Nagoya, Japan	Comparative effectiveness of open-door laminoplasty versus French-door laminoplasty in cervical compressive myelopathy.	Spine. 39 (8) (pp 642-647), 2014. Date of Publication: 15 Apr 2014.	STUDY DESIGN: Prospective randomized study. OBJECTIVE: This study aimed to prospectively compare the surgical results of the open- and French-door laminoplasty. SUMMARY OF BACKGROUND DATA: Cervical laminoplasty is a common surgical procedure for the treatment of cervical compressive myelopathy. These procedures are primarily classified as either open- or French-door laminoplasties. Only few prosp…	Journal: Article		2014
167	Ohashi M. Yamazaki A. Watanabe K. Katsumi K. Shoji H.		(Ohashi, Watanabe, Katsumi) Division of Orthopaedic Surgery, Department of Regenerative and Transplant Medicine, Niigata University Graduate School of Medical and Dental Sciences, 1-757 Asahimachi Dori, Chuo-ku, Niigata City, Niigata, 951-8510, Japan (Yamazaki, Shoji) Spine Center, Department of Orthopaedic Surgery, Niigata Central Hospital, Niigata, Japan	Two-year clinical and radiological outcomes of open-door cervical laminoplasty with prophylactic bilateral C4-C5 foraminotomy in a prospective study.	Spine. 39 (9) (pp 721-727), 2014. Date of Publication: 20 Apr 2014.	Study Design: A prospective study. Objective: To evaluate the 2-year outcomes of open-door cervical laminoplasty with prophylactic bilateral C4-C5 foraminotomy. Summary of Background Data: A prospective trial of prophylactic bilateral C4-C5 foraminotomy with open-door laminoplasty for cervical compression myelopathy showed a significant efficacy for preventing postoperative C5 palsy. However, in …	Journal: Article		2014
168	Rajshekhar V. Muliyil J.		(Rajshekhar) Department of Neurological Sciences, Christian Medical College, Vellore, 632 004, India (Muliyil) Department of Community Medicine, Christian Medical College, Vellore, 632 004, India	Patient perceived outcome after central corpectomy for cervical spondylotic myelopathy.	Surgical Neurology. 68 (2) (pp 185-190), 2007. Date of Publication: August 2007.	Background: Patient perception of outcome after decompressive surgery for CSM is infrequently reported. We evaluated a simple, quantitative patient-reported assessment of outcome after CC for CSM by comparing it with the NGRR. Methods: In a prospective study between 1994 and 2004, patients who underwent CC for CSM were asked to quantify the outcome (relative to their preoperative status) on a sca…	Journal: Article		2007
169	Holly L.T. Moftakhar P. Khoo L.T. Shamie A.N. Wang J.C.		(Holly, Moftakhar, Khoo, Shamie, Wang) Division of Neurosurgery, David Geffen UCLA School of Medicine, Los Angeles, CA 90095, United States (Holly, Khoo, Shamie, Wang) Department of Orthopaedics, David Geffen UCLA School of Medicine, Los Angeles, CA 90095, United States	Surgical outcomes of elderly patients with cervical spondylotic myelopathy.	Surgical Neurology. 69 (3) (pp 233-240), 2008. Date of Publication: March 2008.		Background: Cervical spondylotic myelopathy is a potentially serious neurologic disorder that commonly presents with gait difficulty and hand dysfunction. Because the development of CSM is in large part related to advanced spondylosis and degenerative disk disease, elderly patients appear to be at an increased risk to develop this condition. The surgical outcomes of this patient population have b…		Journal: Article
170	Oh C.H. Kim D.Y. Ji G.Y. Kim Y.J. Yoon S.H. Hyun D. Kim E.Y. Park H. Park H.-C.		(Oh) Department of Neurosurgery, Guro Teun Teun Hospital, Seoul, South Korea (Kim) Department of Neurosurgery, University of Ulsan College of Medicine, Asan Medical Center, Seoul, South Korea (Ji) Department of Neurosurgery, Yonsei University College of Medicine, Seoul, South Korea (Kim) Departments of Radiology, Inha University Hospital, Incheon, South Korea (Yoon, Hyun, Kim, Park, Park) Departm…	Cervical arthroplasty for moderate to severe disc degeneration: Clinical and radiological assessments after a minimum follow-up of 18 months -pfirrmann grade and cervical arthroplasty-.	Yonsei Medical Journal. 55 (4) (pp 1072-1079), 2014. Date of Publication: July 2014.	Purpose: Clinical outcomes and radiologic results after cervical arthroplasty have been reported in many articles, yet relatively few studies after cervical arthroplasty have been conducted in severe degenerative cervical disc disease. Materials and Methods: Sixty patients who underwent cervical arthroplasty (Mobi-C) between April 2006 and November 2011 with a minimum follow-up of 18 months were …	Journal: Article		2014
