# Supplementary material for: Reported Outcome Measures in Degenerative Cervical Myelopathy: A Systematic Review
Source: PLoS One. 2016 Aug 2;11(8):e0157263. doi: 10.1371/journal.pone.0157263 (PMC4970758; doi:10.1371/journal.pone.0157263)
Supplement: S3 Table — Spreadsheet containing the extracted data (agreed by authors BMD and MM) for all included articles. (XLSX) [file pone.0157263.s003.xlsx]

## Sheet: Raw
Ref	First Author	Year	Journal	Include	Location	Location Categories	Study Design	Pro/Retrospective	N	Study Period	Ethics	Clear Inclusion Criteria	Clear Exclusion Criteria	Clear Primary Outcome/Timepoint	Clear Secondary Outcomes/Timepoint	Defined outcome measures?	Age	Sex	Comorbidities	ASA Comorbidity Index?	CCI Comorbidity Index?	Notes	Previous Cervical Surgery	Symptom Duration	Other	Cause of Myelopathy	Homogenous Patient Group?	CSM Only?	Disease Level	Number of Levels Treated	Baseline Imaging?	Used distinctly from radiological outcomes?	MR Assessed?	MR Reported?	MR Criteria?	CT Assessed?	CT Reported?	CT Criteria	Xray (Assessed)	Xray (Reported)		Dynamic Xrays (Assessed)	Dynamic Xrays (Reported)	Dynamic Xray Criteria		Textbook Neurological Examination (Performed)	Examination (Reported)	Clinical Outcome Assessed?	QOL Assessed
151	Kienapfel	2004	Spine	N
5	Kim	2014	Journal of Korean Neurosurgery	N
6	Yan	2014	PLOS One	N
15	Guan	2015		N
16	Zhao	2015		N
20	Kim	2015	The Spine Journal	N
24	Kuang-Ting Yeh	2015	Journal of the Chinese Medical Association	N
27		2015	Neurosurgery	N
28	Tanenbaum	2015	Neurosurgery	N
31	Luo	2015	European Spine Journal	N
32	Nouri	2015	Global Spine Journal	N
40	Razack	1996		N
42	Maurice-Williams	1999	British Journal of Neurosurgery	N
43	NO ACCESS			N
44	Bednarik	1999	Spine	N
45	Sampath	1999	Spine	N
47	Xiangshui	2010	Clinical Radiology	N																																							N
49	Minamide	2010	European Spine Journal	N
54	Eck	2010		N
59	Liu	2011		N
60	Nagashima	2010	European Spine Journal	N
64	Chen	2011		N
66	Liu	2011	Journal of spinal Disorders and Techniques	N
67	Chiewvit	2011	Journal of Medical Association of Thailand	N
74	Kimura	2012	J Orthop Sci	N
75	Tang	2012	Neurosurgery	N
77	Zhao	2012	Arch Orthop Trauma Surg	N
84	Ishii	2012	Journal of spinal Disorders and Techniques	N
88	Sadhu	2012	Orthopaedics	N
105	Singh	2013	Journal of Neurosurgery (Spine)	N
106	Lee	2013	Journal of spinal Disorders and Techniques	N
111	Yamazaki	2003	Neurosurgery	N
112	Rajshekhar	2004	Neurosurgery	N
115	Morishita	2009	European Spine Journal	N
119	Tanaka	2009	Journal of Neurosurgery (Spine)	N
120	Uchida	2009	Journal of Neurosurgery (Spine)	N
124	Uchida	2005	Journal of Orthopaedic Science	N
127	Tanaka	2014	Journal of Orthopaedic Science	N
129	Hasegawa	2002	Journal of spinal Disorders and Techniques	N
136	Rajshekhar	2003	Neurosurgery	N
138	Ghogowala	2015	Neurosurgery	N
142	Wen	2014	Radiology	N
146	Shiraishi	2002	The Spine Journal	N
159	Takahashi	2008	Spine	N
160	Hu	2009	Spine	N
163	Kasis	2009	Spine	N
169	Holly	2008	Surgical Neurology	N
170				N
1	Azimi	2013	Iranian Red Cresent Medial Journal	N
8	Kopjar	2014	Spine	N
13	Ito	2015	The Spine Journal	N
48	Chikuda	2010	European Spine Journal	N
53	Mihara	2009	Spine	N
61	Nakashima	2011	European Spine Journal	N
92	Numasawa	2012	Spine	N
99	Whitmore	2013	The Spine Journal	N
125	Fukui	2007	Journal of Orthopaedic Science	N
126	Fukui	2008	Journal of Orthopaedic Science	N
135	King	2003	Neurosurgery	N
150	King	2004	Spine	N
152	Takayama	2005	Spine	N
153	Doita	2006	Spine	N
2	Kimura	2014	Global Spine Journal	Y	Japan	Japan	Cohort	Pro	116	2008-2011	Y	Y	Y	Y	N/A	Y	Y	Y	Y	N	N	CIRS	N/A	Y		Y	Y	N	Y	N	Y		Y	Y	Transverse area of spinal at area of maximal compression, ISI T2WI change SI changes were classified as type 0 if no intramedullary high SI on T2-weighted images was noted, type 1 if a predominantly (>50%) faint and fuzzy border of high SI was noted, or type 2 if a predominantly (>50%) intense and well-defined border of high SI was noteds	N	N	N	Y	Y	C2-7 Alignment	Y	Y	C2 to C7 ROM		Y	N	Patient satisfaction at 1 year followup	Y
3	Mashhadin	2014	The Archives of Bone and Joint Surgery	Y	Iran	Asia	RCT	Pro	236	2008-2011	Y	Y	Y	Y	Y	Y	Y	Y	N	N	N		N/A	Y	>2months neck pain an inclusion criteria	N	N	N	Y	N	Y		Y	N		N	N	N	Y	N		Y	N			Y	N	[HA granules substitute autograft] Neurological - satisfaction and occupational capacity
4	Qian	2014	Journal of Orthopaedic Surgery and Research	Y	China	Asia	Cohort	Retro	198	2005-2009	Y	Y	Y	Y	N	Y	Y	Y	N	N	N/A		N	N	All patients suffered from c3-c7 compression	N	Y	N	N	Y	Y		Y	N	N	Y	N	N	Y	N		Y	Y	Cobbs Angle		Y	N	Radiography, neurological status
7	vanEck	2014	Spine	Y	US	N.Am	Cohort	Retro	672	2000-2010	Y	Y	Y	Y	Y	Y	Y	Y	Y	N	N/A	Smoking, BMI	N/A	N		N	N	N	Y	N	comb		Y	N	N	Y	N	absence of bridging trabeculae	Y	Y		Y	N	N		Y	N	rate of revision surgery
9	Bui	2015	Orthopaedics	Y	China	Asia	Cohort	Retro	130	2002-2007	Y	Y	Y	Y	N	Y	Y	Y	N	N	N		N	Y	combined symptoms	Y	N	N	N	N	Y		Y	Y	Mean sag diameter T2 most compressed segment	Y	N	N	Y	Y	Cobb angle (C2-7)	N	N			Y	N	JOA, recovery rate
10	Nouri	2015	Spine	Y	Canada	N.Am	Cohort	Retro	102	?	Y	N	N	Y	Y	Y	Y	Y	Y	N	N	smoking status	N	Y		Y	N	Y	N	N	Y		Y	Y	Whole Range: Cord compression, cannal compromise, signal change	N	N	N	N	N		N	N	N		N	N	mJOA
11	Kommu	2015	Asian Journal of Neurosurgery	Y	India	Asia	Cohort	Pro	63	2009-2011	N	Y	Y	N	N	N	Y	Y	N	N	N	N	N	Y	symptoms divided into senosry and motor	Y	Y	N	N	Y	Y		Y	Y	ISI T2WI	Y	N	N	Y	Y		N	N			Y	N	Nurick assessment of functional outcome
12	Khajavi	2014	International Journal of Spine Surgery	Y	Georgia	Europe	Cohort	Pro	72	2007-2012	Y	N	N	Y	N	Y	Y	Y	Y	N	N	Diabetes, Smoker, Depression, BMI	Y	N		N	N	N	Y	Y	N		N	N	N	N			N	N		N	N	N		N	N	safety efficacy of BCS, NDI VAS sf 36	Y
14	Lukasiewicz	2015	Spine	Y	USA	N.Am	Cohort	Retro	5256	2010-2012	Y	Y	N	Y	N	Y	Y	Y	Y	Y	Y	BMI	N	N		N	N	N	N	Y	N		N	N	N	N	N	N	N	N	N	N	N	N		N	N	Y
17	Zhang	2015	Health and Quality of Life Outcomes	Y	China	Asia	Cohort	Pro	142	2008-2011	N	N	Y	Y	N	Y	Y	Y	N	N	N	N	N	N	N	Y	N	Y	N	N	N		N	N	N	N	N	N	N	N	N	N	N	N		Y	N	QOL outcomes consistency of SF-36	Y
18	Wang	2015	Journal of spinal Disorders and Techniques	Y	China	Asia	Cohort	Pro	152	2002-2011	N	Y	Y	Y	N	Y	Y	Y	Y	N	N	HTN CAD, arrhytmia, diabetes	N	N	N	Y	Y	Y	N	Y	N		N	N	N	N	N	N	N	N	N	N	N	N		N	N	long term axial symtoms
19	Hartig	2015	Spine	Y	Australia	Other	Cohort	Pro	104	2008-2010	Y	Y	Y	Y	Y	Y	Y	Y	Y	Y	Y	BMI, Smoking, Preop Opioids	N	N	N	Y	N	Y	Y	Y	N		N	N	N	N	N	N	N	N	N	N	N	N		N	N	incidence of adverse events perioperatively and length of stay
21	Lee	2015	Spine	Y	USA	N.Am	Cohort	Retro	1038	1999-2010	Y	Y	Y	Y	Y	Y	Y	Y	Y	N	N	Y Smoking, diabetics, Klippel Feil anomaly	N/A	N	N	N	N	N	N	Y	N		N	N	N	N	N	N	Y	N	N	N	N	N		N	N	rate of Adjacent segmetn pathology and risk factors for reoperation
22	Phillips	2015	Spine	Y	USA	N.Am	RCT	Pro	293	2005-2007	y	N	N	Y	N	Y	N	N	N	N	N		N	N		N	N	N	N	Y	Y		Y	N	N	Y	N	N	Y	N		Y	N	N		Y	N	long term safety and effectivness - patient reported outcomes outcomes NDI VAS, sf36, ADVERSE EVENTS, Satisfaction, adjacent level degeneration	Y
23	Youzhuan Xie	2014	International Othropaedics	Y	China	Asia	RCT	Pro	68	2006-2008	Y	Y	Y	Y	N	Y	Y	Y	N	N	N		N	Y		N	N	N	Y	Y	N		N	N	N	N	N	N	N	N		N	N	N				fusion rate, JOA neck arm pain, complication rate
25	Tomii	2015	Clin Neurol Nsgy	Y	Japan	Japan	Cohort Comparison	Pro	53	2003-2013	N	Y	N	Y	N	Y	Y	Y	N	N	N		N	Y		Y	N	Y	Y	Y	N		N	N	N	N	N	N	N	N		N	N	N		Y	n	Recovery rates NCSS Nruick, neurological state, changes in disability
26	Nouri	2015	Spine	Y	Canada	N.Am	Cohort	Ambi	99	2005-2007	N	Y	Y	Y	N	Y	Y	Y	Y	N	N	Smoking, Psychiatric Disorder	N	Y		Y	N	N	N	N	Y		Y	Y	Various: But didn't add to the prediction rule. Mid sagittal slice on the T2 W1, level of greatest cord compression and canal compromise and presence absence of signal change on T1, MSCC MCC	N	N	N	N	N	N	N	N	N		N	N	functional status how MRI predictive models can correlate with mJOA
29	Li	2015	PLOS One	Y	China	Asia	Cohort	Retro	309	2011-2014	Y	Y	Y	N	N	Y	Y	Y	Y	N	N	BMI, IHD, DM, HTN	N	N	N	Y	N	Y	N	N	Y		Y	N	N	Y	N	N	N	N	N	N	N	N		N	N	blood pressure
30	Liz	2015	European Spine Journal	Y	China	Asia	Cohort	Pro	91	2000-2002	Y	Y	Y	Y	N	Y	Y	Y	N	N	N		N	Y		Y	N	N	Y	Y	Y		Y	Y	MCS LFH multilevel cervical spondylosis, AP diameters posterior shift of spinal cord 1 month 1 year 5 years and 10 years	Y	Y	LFH	y	y	CCI ROM					N	N	Neurological outcomes, pain outcomes
33	Jeyamohan	2015	Journal of Neurosurgery (Spine)	Y	USA	N.Am	RCT	Pro	112	2008-2012	Y	Y	Y	Y	N	Y	y	y	Y	N	N	BMI, Smoker	N	N		N	N	N	N	Y	N		N	N	N	N	N	N	N	N	N	N	N	N		N	N	preventing dysphagia and airway oedeam and steroid use	Y
34	Lemcke	2011	The Open Orthopaedics Journal	Y	Germany	Europe	Cohort	Retro	335	2002-2007	N	Y	Y	Y	Y	Y	Y	Y	N	N	N		N/A	N		N	N	N	Y	Y	Y		Y	N	N	N	N	N	N	N		N	N	N		N	N	Effectiveness of spacer - neurological, security against dislocation
35	Sherief	2013	Acta Chir Orthop Traumatol Cech.	Y	Czech	Europe	Cohort	Pro	71	2006-2010	N	Y	Y	Y	Y	Y	y	y	N	N	N		N/A	N		Y	Y	Y	N	Y	Y		Y	Y	Signal change	N	N	N	N	N	N	N	N	N		N	N	functional, neurological
36	Baba	1995	International Othropaedics	Y	Japan	Japan	Cohort	Retro	56	1982-1991	N	Y	N	N	N	Y	Y	Y	N	N	N		N/A	N		Y	Y	Y	N	N	N		N	N	N	N	N	N	N	N		N	N	N		N	N	neurological prognosis
37	Tsuzuki	1996	International Othropaedics	Y	Japan	Japan	Cohort	Pro	118	1987-1990	N	N	N	Y	N	Y	Y	N	N	N	N		N	N	N	Y	Y	N	N	N	N		N	N	N	N	N	N	N	N	N	N	N	N		N	N	neurological
38	Inoue	1996	Journal of Neurosurgery	Y	Japan	Japan	Cohort	Pro	76	1981-1991	N	Y	Y	Y	N	Y	Y	Y	N	N	N		N	N	N	Y	Y	N	N	Y	Y	N	N	N	N	Y	Y	Transverse area and circularity of dural tube, spinal canal dimensions	y	y	alignment, flexibility	N	N	N		N	N	neurological evaluation, post op recovery rate
39	Nagata	1996	Spinal Cord	Y	Japan	Japan	Cohort	Pro	173	1986-1996?	N	N	N	N	N	N	Y	N	N	N	N		N	Y		Y	Y	N	Y	N	Y	Y	Y	Y	Compression: class 1-3 qualitative	N	N	N	N	N	N	N	N	N		N	N	functional, neurological
41	Fujimura	1998	Arch Orthop Trauma Surg	Y	Japan	Japan	Cohort	Retro	55	5 years c 1992-1997, can't find years	N	Y	N	Y	N	Y	Y	Y	N	N	N		N	Y		Y	Y	N	N	N	Y	N	N	N	N	N	N	N	Y	Y	AP diameter of spinal canal, ossification, curve index	N	N	N		N	N	Y Neurological function
46	Shin	2010	Acta Neurochir	Y	South Korea	Asia	cohort	Pro	137	2006-2009	N	Y	Y	Y	N	Y	Y	Y	N	N	N		N, but excuded if trauma on already existing CSM, no surgery mentioned	Y		Y	Y	Y	Y	Y	Y	Y	Y	Y	Cervical stenosis, compression ratio, length of signal intensity	N	N	N	Y	Y	Cervical spine stenosis (torg-pavlov ratio), CCI	N	N	N		Y	N	Y functional outcome- neurological outcome
50	Lian	2010	European Spine Journal	Y	China	Asia	RCT	Pro	105	2005-2007	N	Y	Y	Y		Y	Y	Y	N	N	N		N/A	N		Y	Y	Y	N	Y	Y	Y	Y	Y	No of Levels	N	N	N	N	N		N	N	N		N	N	Y neurological
51	Goffin	2010	Journal of Neurosurgery (Spine)	Y	Belgium	Europe	RCT	Pro	98	2000-2001	N	Y	Y	Y	Y	Y	Y	Y	N	N	N		N/A	N	Weight	Y	N	N	Y	Y	N	N/A	N	N	N	N	N	N	N	N		N	N	N		N	N	functional outocmes, neurological outcomes	Y
52	Sivaraman	2010	Journal of spinal Disorders and Techniques	Y	UK	Europe	Cohort	Pro	50	2 years	N	Y	N	Y	N	Y	Y	Y	N	N	N		N	N		N	N	N	N	N	Y	N	Y	Y	Mean cross sectional area of spinal cord, mean AP diameter	N	N	N	Y	N	ROM C2-C7 Angle on lateral flexion	N	N	N		N	N	intraoperative blood loss and duration, complicaions, mental and physical health and pain	Y
55	Halvorsen	2011	Acta Neurological Scandinavia	Y	Norway	Europe	Cohort	Retro	318	2003-2008	Y	Y	N	Y	N	Y	Y	Y	Y	Y	N	Warfarin, Steroids, DM, Platelet Inhibitor, Recent Neck Trauma	Y	N		Y	Y	Y	N	Y	N	N/A	N	N	N	N	N	N	N	N		N	N	N		Y	N	Neurological function, reoperation for po haematoma
56	Wan Jun	2011	Chinese Journal of Traumatology	Y	China	Asia	RCT	Pro	102	2006-2007	N	Y	Y	Y	N	Y	Y	Y	N	N	N		N	N		Y	Y	Y	N	N	Y	Y	Y	N	More than 2 levels compressed	Y	N	exclusion of ossification	Y	Y	ROM C2-C7 angles at lordotic and kyphotic, CCI	N	N	N		Y	N	JOA neural function recovery rrate, CCI ROM
57	Cheng	2011	Clin Orthop Relat Res	Y	China	Asia	RCT	Pro	83	2004-2006	Y	Y	Y	Y	N	Y	Y	Y	Y	N	N	Smoking	N/A	N	N	N	Y	N	Y	Y	Y	Y	Y	N	diagnosis	Y	N	diagnosis	Y	N	Agnular motion at target level	N	N	N		Y	N	Y	Y
58	Cho	2011	European Spine Journal	Y	Korea	Asia	Cohort	Pro	74	2006-1009	N	Y	Y	Y	Y	Y	Y	Y	N	N	N		N	Y		Y	Y	N	Y	Y	Y	Y	Y	Y	Compression ratio SI changes, GD DTPA contrast enhancement. 3 gorups - A normal signals, B high SI on T2, C normal T1 high SI t2 and enhancement	N	N	N	N	N		N	N	N		Y	N	Functional outcome
62	SunQ	2011	European Spine Journal	Y	China	Asia	RCT	Pro	56	2005-2008	Y	Y	Y	Y	Y	Y	Y	Y	N	N	N		N/A	Y		Y	Y	N	N	N	Y	Y	Y	Y	spinal canal diameter C2-C7 average	Y	Y	occupying rate (proportion occupied by OPLL)	Y	Y	Type of OPLL	N	N	N		Y	N	neurological status
63	Sasso	2011	Journal of Bone & Joint Surgery	Y	USA	N.Am	RCT	Pro	319	2002-2004	y	Y	Y	Y	N	Y	Y	Y	Y	N	N	%Working	N	N	N	N	N	N	N	Y	Y	N	N	N	N	N	N	N	N	N	N	y	y	y cobb measurement		N	N	Y	Y
65	Furlan	2011	Journal of Neurosurgery (Spine)	Y	Canada	N.Am	Cohort	Pro	81	2005-2007	Y	y	N	Y	Y	Y	Y	Y	Y	N	Y	Number of ICD Codes	N	Y	IME	Y	N	Y	N	Y	N	N/A	N	N	N	N	N	N	N	N	N	N	N	N		Y	N	Neurological outcome, functional outcome
68	Ghogowala	2011	Neurosurgery	Y	USA	N.Am	Cohort	Pro	50	2007-2009	Y	Y	Y	Y	Y	Y	Y	Y	N	N	N		N/A	N	N	Y	N	Y	Y	Y	Y	Y	Y	N	N	Y	N	eligibility for anterior or posterior approachy (Spinal MDT)	N	N		Y	N	N		Y	N only for diagnosis	Y	Y
69	Rhee	2011	Spine	Y	USA	N.Am	Cohort	Pro	54	2008?	Y	Y	N	Y	Y	Y	Y	Y	N	N	N		N	N	N	N	N	N	Y	Y	Y	Y	Y	N	N	N	N	N	N	N	N	N	N	N		N	N	N
70	Hirai	2011	Spine	Y	Japan	Japan	Cohort	Pro	86	1996-2003	y	Y	Y	Y	N	Y	Y	Y	N	N	N		N/A	Y		Y	Y	Y	N	Y	Y	N	Y	Y	residual anterior compression	N	N	N	Y	Y	cervical spine alignment, ROM flexion extension	N	N	N	N	N	N	Y
71	Park	2011	Spine	Y	USA	N.Am	RCT	Pro	454	1 year	N	Y	Y	Y	N	Y	Y	Y	N	N	N		N	N	N	N	N	N	N	N	Y	N	N	N	N	N	N	N	Y	Y	Angular rotation, translation, Centre of rotation	N	N	N		N	N	N
72	Epstein	2011	Surgical Neurology International	Y	USA	N.Am	Cohort	Pro	53	N 2011	N	N	N	Y	N	Y	Y	Y	Y	N	N	Listed	Y	N		Y	N	N	N	Y	Y	Y	Y	N	Aetiology	Y	N	Aetiology	N	N		N	N	N		N	N	Y	Y
73	Epstein	2011	Surgical Neurology International	Y	USA	N.Am	Cohort	Pro	60	2-3 years	N	N	N	Y	y	Y	Y	Y	Y	N	N	Listed	Y	N		Y	N	N	Y	Y	Y	Y	Y	Y	inceased signal myelomalacia	y	Y	OPLL	N	N		N	N	N		Y	Y	Y	Y
76	Thakar	2012	Acta Neurochir	Y	India	Asia	Cohort	Pro	51	2004-2006	N	Y	Y	Y	Y	Y	Y	Y	N	N	N		N/A	N		Y	Y	Y	N	Y	Y	Y	Y	N	N	N	N	N	N	N		N	N	N				Y pain as a health status measure	Y
78	Zhang	2012	Eur J Orthop Surg Traumatol	Y	China	Asia	Cohort	Pro	59	2005-2008	N	Y	Y	Y	N	Y	Y	Y	N	N	N		N/A	Y		Y	Y	Y	Y	Y	Y	Y	Y	Y	Values of signal intensity of spinal cord T2W T1W, ratio of signal intensity of area of the spinal cord, compression rate	N	N	N	N	N		N	N	N		N	N	Y
79	Liu	2012	European Spine Journal	Y	China	Asia	Cohort	Retro	286	2005-2010	N	Y	Y	Y	N	Y	Y	Y	N	N	N		N/A	N		Y	N	Y	Y	Y	Y	Y	Y	N	Decision making for type of treatment	Y	N	N	N	N		N	N	N		Y	N	Y	Y
80	Nakashima	2012	European Spine Journal	Y	Japan	Japan	Cohort	Pro	101	2008 1 year	N	Y	Y	Y	Y	Y	Y	Y	N	N	N		N	Y		Y	Y	N	Y	Y	Y	Y	Y	Y	SI changes T2 weighted	N	N	N	Y	C2-C7 lordotic angle, C7 plumb line		N	N	N		Y step test	Y	Correlation of Step test with JOACMEQ prediction	Y
81	Kotani	2012	European Spine Journal	Y	Japan	Japan	Cohort	Pro	90	2000-2008	N	Y	N	Y	N	Y	Y	Y	N	N	N		N	N		Y	N	Y	N	Y	Y	N	N	N	N	N	N	N	Y	C2-C7 lordotic angle		y	y	ROM flex ex?		N	N	Y axial pain, cervical spine function QOL	Y
82	Sumi	2012	Journal of Neurosurgery (Spine)	Y	Japan	Japan	Cohort	Pro	55	1995-2003, 2009 follow-up	N	Y	Y	Y	Y	Y	Y	Y	N	N	N		N	N		Y	N	Y	N	N	Y	Y	Y	Y	Classification of cord shapes at lateral sies on axial T1 MRI, Extent of cord compression, compression ratio NIH image software	N	N	N	N	N		N	N	N	N	N	N	Prognosis of mild CSM
83	Fehlings	2011	Journal of Neurosurgery (Spine)	Y	Canada	N.Am	Cohort	Pro	302	2005-2007	Y	Y	Y	Y	N	Y	Y	Y	Y	N	N	cormorbidity score calculated (mild1/mod2/sev3) for a list of specific comorbidities and summing assigned points for each condition	N/A	N		Y	N	Y	N	Y	Y	Y	Y	N	N	Y	N	N	N	N	N	N	N	N	N	N	N	Y Perioperative and delayed complications
85	Wang	2012	Neurology India	Y	India	Asia	RCT	Pro	50	2008-2010	Y	Y	Y	Y	N	Y	Y	Y	N	N	N	comorbidities excluded	N	N		Y	N	N	Y	Y	Y	N	N	N	N	Y	N	N	Y	Y	C2-C7 lordotic angle Cobbs method	N	N	N		N	N	Y	Y
86	Nurboja	2012	Neurosurgery	Y	UK	Europe	Cohort	Retro	268	1999-2009	N	Y	N	Y	Y	Y	Y	Y	N	N	N		N	Y		N	N	N	N	Y	Y	N	N	N	N	N	N	N	Y	Y	Sagittal alignment	N	N	N	Pavlovs ratio	N	N	neck apin, quality of life	Y
87	Liu	2012	Orthopaedic Surgery	Y	China	Asia	Cohort	Pro	116	2005-2010	N	Y	Y	Y	N	Y	Y	Y	N	N	N		N	Y		Y	N	N	N	Y	Y	Y	Y	N	N	Y	N	For some, not exlplicit	N	N	N	N	N	N		N	N	Y Neck pain, complications QOL	Y
89	Machino	2012	Spine	Y	Japan	Japan	Cohort	Retro	520	1995-2006	Y	Y	Y	Y	N	Y	Y	Y	N	N	N		N/A	Y		Y	Y	Y	Y	Y	Y	Y	Y	Y	Myelopathy secondary to multisegmental cervical spondylotic stenosis	N	N	N	N	N	N	N	N	N	Myelography	Y	Y - confirmation of myelopathy	Y operative time and blood loss, severity of myelopathy
90	Matsumoto	2012	Spine	Y	Japan	Japan	Cohort	Pro	69	2004-2005	N	Y	N	Y	N	Y	Y	Y	N	N	N		N	N	Mean follow-up 6.2 years	Y	Y	N	N	Y	Y	N	N	N	N	N	N	N	Y	Y	lamina closure - a decreasedof te canal to body ratio by 10% or more	N	N	N		N	N	Y	Y
91	Wen	2012	Spine	Y	China	Asia	Cohort	Retro	229	1999-2010	Y	Y	Y	Y		Y	Y	Y	Y	N	N	Smoking, Specific List (reported as number)	N/A	Y		Y	Y	Y	Y	Y	Y	Y	Y	Y	Canal Vertebral Body Ratio: Mean Pavlov ratio C3-6	N	N	N	Y	Y		Y	Y			N	N	Y Adverse events, surgical approach, functional assessment
93	Machino	2012	Spine	Y	Japan	Japan	Cohort	Retro	520	1995-2006	Y	Y	Y	Y	N	N	Y	Y	N	N	N		N/A	Y		Y	Y	Y	Y	Y	Y	Y	Y	N	N	N	N	N	N	N		N	N	N		Y	Y confirmed	Y operative time blood loss
94	Sakai	2012	Spine	Y	Japan	Japan	Cohort	Pro	42	1996-2002	N	Y	Y	Y	N	Y	Y	Y	N	N	N		N/A	N		Y	Y	N	N	Y	N	N/A	N	N	N	N	N	N	N	N	N	N	N	N		N	N	Y
95	Zhang	2012	Spine	Y	China	Asia	RCT	Pro	120	2004-2006	N	Y	Y	Y	N	Y	Y	Y	N	N	N		N	N		N	N	N	Y	N/A	Y	N	Y	N		Y	N	N	Y	Y		Y	Y	ROM drawing lines between the superior endlplate of the adjacent cranial vertetra and the inferior endplate of the adjacent caudal vertebra		N	N	Y
96	Machino	2012	Spine	Y	Japan	Japan	Cohort	Pro	520	1995-2006	Y	Y	Y	Y	N	Y	Y	Y	N	N	N		N/A	Y	mean follow-up time	Y	Y	Y	Y	Y	Y	Y	Y	N	Selection of patients	N	N	N	N	N	N	N	N	N		N	N	Y
97	Katsumi	2012	Spine	Y	Japan	Japan	Cohort Comparison	Pro	141+141	2009-2010, 2006-2008	Y	Y	Y	Y	N	Y	Y	Y	N	N	N		N	N		Y	N	N	N	Y	N	N/A	N	N	N	N	N	N	N	N		N	N	N		N	N	Y
98	Seng	2013	The Spine Journal	Y	Singapore	Asia	Cohort	Pro	116	2005-2007	Y	Y	Y	Y		Y	Y	Y	Y	N	N	BMI	N/A	N		Y	N	Y	Y	Y	Y	Y	Y	N	Selection of patients	N	N	N	N	N	N	N	N	N		Y	N	Y	Y
100	Pumberger	2013	Journal of Bone & Joint Surgery	Y	USA	N.Am	Cohort	Retro	248	2000-2010	N	Y	N	Y	N	Y	Y	Y	Y	N	N	BMI	Y	Y	follow up	Y	N	Y	N	Y	N	N/A	N	N	N	N	N	N	N	N		N	N	N		N	N	Investigating clinical predictors of surgical outcome
101	Wang	2013	Cellular Physiology and Biochemistry	Y	China	Asia	Cohort Comparison	Pro	499	2003-2006	Y	Y	Y	Y	Y	N	Y	Y	Y	N	N	BMI, Smoker, FH, Desk Work, DM	N/A	N		Y	Y	Y	N	Y	Y	Y	Y	Y	Selection, T2MR SI	N	N	N	N	N	N	N	N	N		Y for diagnosis	N	Y
102	Yoshida	2013	European Spine Journal	Y	Japan	Japan	Cohort	Pro	369	2005-2009	Y	Y	Y	Y	Y	Y	Y	Y	Y	N	N	Pre-Op Neurological Status (anything that might confound interpretation)	N/A	N		Y	N	Y	Y	N	Y	Y	Y	N	Diagnosis	N	N	N	N	N		N	N	N		Y for diagnosis	N	Y
103	Fehlings	2013	Journal of Bone & Joint Surgery	Y	Canada	N.Am	Cohort	Pro	278	2005-2007	Y	Y	Y	Y	Y	Y	Y	Y	Y	N	N	Race, Smoker	N/A	Y		Y	Y	N	N	Y	Y	Y	Y	N	Diagnosis	N	N	N	N	N	N	N	N	N		N	N	Y	Y
104	Tetreault	2013	Journal of Bone & Joint Surgery	Y	Canada	N.Am	Cohort	Pro	278	2005-2007	N	Y	Y	Y	N	Y	Y	Y	Y	N	N	Listed as subcategories, eg. CVD, Neuro	N/A	Y	symptoms	Y	Y	N	N	N	Y	Y	Y	Y	Cord compression by measuring the transverse area at maximal compression	N	N	N	N	N	N	N	N	N		Y	Y	Y
107	Phillips	2013	Spine	Y	USA	N.Am	RCT	Pro	342	2005-2007	Y	Y	Y	Y	N	Y	Y	Y	Y	N	N	Race, BMI, tobacco, workers compensation	Y	N	Neurological symptoms	Y	N	N	Y	Y	Y	Y	Y	N	Aetiology	Y	N	N	N	N		N	N			Y	N	Y	Y
108	Fehlings	2013	Spine	Y	Canada	N.Am	Cohort	Pro	278	2005-2007	Y	Y	Y	Y	N	Y	Y	Y	Y	N	N	Smoking	N/A	Y		Y	Y	N	N	Y	Y	Y	Y	N	Diagnosis	N	N	N	N	N	N	N	N	N		N	N	Y	Y
109	Karpova	2013	Spine	Y	Canada	N.Am	Cohort	Pro	65	2006-2007	Y	Y	Y	Y	Y	Y	Y	Y	N	N	N		N/A	Y		Y	Y	N	Y	Y	Y	Y	Y	Y	Numerous: spinal column alignment, AP diameter and TA of the spinal cord, SI changes on T1 and T2 wieghted sequence, sagittal alignmetn Harisson post tangent mthod, Cervical lordosis hyphosis rotation angled formed by tangents of post margins of C2 and C7	N	N	N	N	N	N	N	N	N		Y	N	MRI and demographics assoicated with baseline functional scores and predictive of post op outcome
110	Bapat	2008	European Spine Journal	Y	India	Asia	Cohort	Pro	129	2000-2006	N	Y	Y	Y	Y	Y	Y	Y	Y	Y	N		N	Y		Y	N	Y	N	Y	Y	Y	Y	Y	Various: Effacement of anterior CSF buffer, evience of anterior compression of cord substance on T1 sagittal, cord ratio <0.4 onT2 images, post smooth contour of cord maintiained. Posterior cord compression cord criteria too, Pavlovs ratio, no of levels involvement	N	N	N	Y	N	Spinal column alignment on lateral extension,	Y	Y	assessment of instability of flex extension lateral cervical		N	N	Y
113	Ding	2008	China Medical Journal	Y	China	Asia	Cohort	Pro	76	N	N	Y	N	Y	N	N	Y	Y	N	N	N		N	Y	Somatosensory evoked potentials, used for preoperative diagnostic detection and intraoperative monitoring	Y	Y	Y	N	N	N	N/A	N	N	N	N	N	N	N	N	N	N	N	N		Y	N	somatosensory evoked potentials
114	Stawicki	2009	European Journal of General Medicine	Y	USA	N.Am	Cohort Comparison	Retro	285	1974-2001	N	Y	N	N	N	N	Y	Y	N	N	N		N	Y	geriatric vs non-geriatric	N	N	N	Y	N	Y	Y	Y	N	N	Y	Y	myelogram	N	N	N	N	N	N		N	N	Y
116	Riew	2008	Journal of Bone & Joint Surgery	Y	USA	N.Am	RCT	Pro	199	2002-007? Doesn’t say anywhere	N	Y	Y	Y	N	N	Y	Y	Y	N	N	Smoker, Employment status, Workers Compensation	N/A	N	Bryan Trial patients and Prestige trial	N	Y	N	Y	N/A	N	N/A	N	N	N	N	N	N	N	N		N	N	N		Y	N	Y	Y
117	Lali	2009	Journal of Clinical Neuroscience	Y	USA	N.Am	Cohort	Pro	50	No mention 2004?	N	Y	Y	Y	N	Y	Y	Y	Y	N	N	Diabetes Smoker	N	N		Y	Y	Y	N	Y	Y	Y	Y	Y	cord signal change on sagittal T2W	N	N	N	N	N		N	N	N		Y	N	Y
118	Kaito	2009	Journal of Neurosurgery (Spine)	Y	Japan	Japan	Cohort	Pro	86	1998-2002	N	Y	N	Y	Y	Y	Y	Y	N	N	N		N	N	follow up	Y	Y	N	Y	N	Y	N	N	N	N	y	y	Displacemetn in sagittal plane, displacement in the axial plane, bone HA spacer bonding	N	N	Displacemetn in sagittal plane	N		N		N	N	Y
121	Setzer	2009	Journal of Neurosurgery (Spine)	Y	Germany	Europe	Cohort	Pro	60	doesn't say, 2008?	Y	Y	Y	Y	N	Y	Y	Y	N	N	N		N	Y		Y	Y	Y	N	Y	Y	Y	Y	Y	spinal cord diameter most compresssed segment, Signal Intensity	Y	N	N	N	N		N	N	N		Y	N	effect of APO E on outcome
122	Singh	2001	Journal of Neurosurgery (Spine)	Y	UK	Europe	Cohort	Pro	69	N	Y	Y	N	Y	N	N	Y	Y	N	N	N		Y	N		Y	Y	Y	N	N	Y	Y	Y	Y	SI change, severity of compression 0-7 maximal sagittal diameter	N	N	N	N	N		N	N	N		N	N	Y
123	Mayr	2002	Journal of Neurosurgery (Spine)	Y	America	N.Am	Cohort	Retro	261	1989-1995	N	Y	N	Y	N	Y	Y	Y	N	N	N		Y	N		Y	N	N	N	Y	N	N/A	N	N	N	N	N	N	N	N		N	N	N		Y	N	N
128	Singh		Journal of Outcome Measurement	Y	UK	Europe	Cohort	Pro	100	doesn't say, 2008?	Y	N	N	Y	Y	N	Y	Y	N	N	N		N/A	N		Y	N	Y	N	N	Y	Y	Y	N	Diagnosis	N	N	N	N	N		N	N	N		N	N	Y the applicability of scales to CSM patients	Y
130	Takahashi	2006	Journal of spinal Disorders and Techniques	Y	Japan	Japan	Cohort	Pro	55	1995-2002	Y	Y	N	Y	N	Y	Y	Y	N	N	N		N/A	N	N	Y	Y	N	Y	N	Y	Y	N	N	N	Y	Y	Most compressed disc level, cross sectional areas of spinal cord	N	N	N	N	N	N		Y	Y	Y
131	Gok	2009	Neurological Research	Y	America	N.Am	Cohort	Pro	54	2002-2006	N	Y	Y	Y	Y	Y	Y	Y	N	N	N		N	Y		Y	Y?	Y	N	Y	Y	Y	Y	N	Diagnosis	Y	N	N	Y	N	N	N	N	N		Y	N	Y
132	Zong	2014	Neurological Sciences	Y	china	Asia	Cohort	Pro	412	2007-2011	Y	Y	Y	Y	N	N	Y	Y	Y	N	N	Smoker, Employment Status	N/A	Y		Y	Y	N	N	N	Y	N	Y	Y	Spinal cord expansion, intensity signal, CCI Ishihara method	N	N	N	N	N		N	N	N		N	N	Y how depression contributes
133	Yadav	2014	Neurology India	Y		Asia	Cohort	Pro	50	N 3 month follow-up	N	Y	Y	Y	N	Y	Y	Y	N	N	N		N	N	N	Y	N	Y	Y	Y	Y	Y	Y	N	Diagnosis	N	N	N	N	N		N	N	N		Y	N	Y
134	Gocmez	2013	Spine	Y	Canada	N.Am	Cohort	Pro	65	2006-2007	Y	Y	Y	Y	Y	Y	Y	Y	N	N	N		N/A	Y		Y	Y	N	Y	Y	Y	Y	Y	Y	Various: Apdiameter, TA or spinal cord at site of maximal compression, SI changes. Sagittal alignement by Harosson posterior tangent method. Degree of cervical lordosis/kyphosis C2-C7 tangents	N	N	N	N	N		N	N	N		Y	N	Y
137	Steinmetz	2008	Neurosurgery	Y	America	N.Am	Cohort	Pro	93	not reported	Y	Y	Y	Y	Y	Y	Y	Y	Y	N	N	Weight, Drinker, Smoking, Litigation	N/A	N		N	N	N	N	N	N	N/A	N	N	N	N	N	N	N	N	N	N	N	N		N	N	work staus, time to returm to work	Y
139	Hu	2014	Orthopaedics	Y		Asia	Cohort Comparison	Pro	55	2005-2011	Y	Y	Y	Y	N	Y	Y	Y	N	N	N		N/A	Y		Y	Y	N	N	N	Y	N	Y	Y	vertebral body to spinal cord distance AP diameter of the spinal cord	Y	y	opening angle	N	N		N	N	N		Y	N	Y
140	Wang	2014	PLOS One	Y	China	Asia	Cohort Comparison	Pro	230	not reported	Y	Y	Y	Y	Y	Y	Y	Y	Y	N	N	Smoking, BMI, DM, spne dosrder, desk worktime, FH	N	N		Y	Y	Y	N	Y	Y	Y	Y	N	Diagnosis	N	N	N	N	N		N	N	N		Y	N	Y for HIF polymorphism
141	Chen	2001	Radiology	Y	Taiwan	Asia	Cohort	Pro	64	1999-2000	Y	Y	N	Y	N	Y	Y	Y	N	N	N		N	N		Y	Y	Y	N	N	Y	Y	Y	Y	Cord compression ratio, cervical curvature, intramedullary SI	N	N	N	N	N		N	N	N		N	N	Y
143	Xiaou	2006	Rivista Italiana di Ossigeno-Ozonoterapia	Y	China	Asia	Cohort	Pro	86	2002-2005	Y	N	N	Y	N	Y	Y	Y	N	N	N		N	N		Y	N	Y	Y	N	Y	Y	Y	N	Diagnosis	Y	N	N	N	N		N	N	N		Y do diagnose	N	Y after Ozone injection treatment - McNabb Method
144	Arnold	2014	The Spine Journal	Y	North America	N.Am	Cohort	Pro	302	2005-2007	Y	Y	N	Y	N	N	Y	Y	Y	N	N	BMI, Smoker, Race, Comorbidities, Benefits	N	Y		Y	Y	N	N	Y	N	N/A	N	N	N	N	N	N	N	N	N	N	N	N		Y do diagnose	N	diabetic vs nondiabetic	Y
145	Tetreault	2015	The Spine Journal	Y	Canada	N.Am	Cohort	Pro	272	2007-2011	Y	Y	Y	Y	Y	Y	Y	Y	Y	N	N	Psychiatric disorders, smoking	N/A	Y		Y	Y	N	N	N	N	N/A	N	N	N	N	N	N	N	N	N	N	N	N		N	N	New clinical prediction model built using data
147	Suri	2003	The Spine Journal	Y	India	Asia	Cohort	Pro	146	1999-2001	N	Y	N	Y	Y	Y	Y	Y	N	N	N		N	Y		Y	Y	N	Y	Y	Y	Y	Y	Y	Level of compression, Whethere Ant or Pos, Presence or absence of intramedullary signal changes on T1 and T2	N	N	N	Y	N		N	N	N		Y	N	Y
148	Sampath	2000	Spine	Y	USA	N.Am	Cohort	Pro	62	not reported	N	Y	N	Y	Y	Y	Y	Y	Y	N	N	Litigation, Workers Compensation	Y	Y		N	Y	N	Y	Y	N	N/A	N	N	N	N	N	N	N	N		N	N	N		Y	Y	Y functional status, acitivities of daily living, planned
149	Kamizono	2003	Spine	Y	Japan	Japan	Cohort	Retro	301	1980-2002?	N	Y	Y	Y	Y	Y	Y	Y	N	N	N		N	Y	Occupation - professional driver, heavy labour, high rise work, light standing labour, light sedentary labour	Y	Y	N	N	N	N	N/A	N	N	N	N	N	N	N	N		N	N	N	N	N	N	Y
154	Zhang Ying	2007	Spine	Y	China	Asia	RCT	Pro	178	2001-2008	N	Y	Y	Y	N	Y	Y	Y	Y	N	N	Smoking	N	N	use of cages	Y	Y	Y	Y	Y	N	N/A	N	N	N	N	N	N	N	N		N	N	N		N	N	Y
155	Yukawa	2007	Spine	Y	Japan	Japan	Cohort	Pro	104	1995-2000	N	Y	Y	Y		Y	Y	Y	N	N	N		N/A	Y		Y	Y	N	Y	Y	Y	Y	Y	Y	ISI of spinal cord to classify patients into grade 0, 1,2	N	N	N	N	N		N	N	N		N	N	Y
156	Mihara	2007	Spine	Y	Japan	Japan	Cohort	Pro	80	not specified, 2 year follow-up so probably 2003-2006	N	Y	N	Y	N	Y	Y	Y	N	N	N		N	N		Y	N	N	N	N	Y	Y	Y	Y	Intramedullary high intensity lesions at the level of maximal compression	N	N	N	N	N	N	N	N	N		N	N	Y
157	Shimomura	2007	Spine	Y	Japan	Japan	Cohort	Pro	70	195-2003	N	Y	Y	Y	Y	Y	Y	Y	N	N	N		N	N		Y	Y	Y	N	N	Y	Y	Y	Y	High signal intensity area, extent of cord compression	N	N	N	N	N		N	N	N		N	N	Y conservative treatment
158	Kyung-Soo Suk	2007	Spine	Y	Korea	Asia	Cohort	Pro	85	2004-2006? Doesn't say	N	N	N	Y	N	Y	Y	Y	N	N	N		N	N		Y	Y	N	N	N/A	Y	N	N	N	N	N	N	N	Y	Y	Cobbs method	Y	Y	diagnosis, degree of preoperative sagittal alginment ROM		N	N	N
161	Anderson	2009	Spine	Y	USA	N.Am	Cohort	Retro	488	2007? Doesn't say	N	Y	Y	Y	N	Y	Y	Y	Y	N	N	Race, Marital Status, Smoker, Alcohol, Types of Analgesia, Litigation, Workers Compensation, Preop Work Status	N/A	N	drugs, alcohol, martial status - all these where part of logistic regression analysis, do they count?	Y	N	N	Y	N/A	N	N/A	N	N	N	N	N	N	N	N		N	N	N		N	N	y IDENTIFYing prognostic factors to which are important predictors of outcome	Y
162	Suzuki	2009	Spine	Y	Japan	Japan	Cohort	Pro	98	1995-2002	N	Y	Y	Y	Y	Y	Y	Y	N	N	N		N	Y		Y	Y	N	Y	Y	N	N/A	N	N	N	N	N	N	N	N		N	N	N		N	N	Y how older patients compared with recovery times
164	Karpova	2014	Spine	Y	Canada	N.Am	Cohort	Pro	134	2006-2007	Y	Y	Y	Y	Y	Y	Y	Y	N	N	N		N	Y		Y	Y	N	N	N	Y	Y	Y	Y	TA of spinal cord at level of maximal compression, SI change on T1 T2 weighted sequences	N	N	N	N	N		N	N	N		Y	Y	Y	Y
165	Macchino	2014	Spine	Y	Japan	Japan	Cohort	Pro	505	2007-2011	Y	Y	Y	Y	N	Y	Y	Y	Y	N	N	BMI, DM, HTN, Anticoags, Antips, Smoking	N/A	Y		Y	Y	Y	Y	Y	Y	Y	Y	ISI	N	N	N	N	N	N		N	N	N		Y	N	Y comparison of diabetic vs non-diabetic patients
166	Nakashima	2014	Spine	Y	Japan	Japan	RCT	Pro	92	1989-1997	N	Y	Y	Y		Y	Y	Y	N	N	N		N/A	N		Y	Y	N	Y	Y	Y	N	Y	Y	Spinal canal/body ratio	N	N	N	Y	Y	Cobb angle, lordotic angles in flexion extension positions, ROM	N	N	N		N	N	Y
167	Ohashi	2014	Spine	Y	Japan	Japan	Cohort Comparison	Pro	141	2009-2010, 2006-2008	Y	Y	Y	Y	N	Y	Y	Y	N	N	N		N	N		Y	N	N	N	Y	Y	N	N	N	N	Y	Y	Facet joint preservation rates	Y	Y	Cobb angle, C4c5-lordosis C2-C7 Lordosis, ROM	Y	Y	As before lodosis C2-C7, C4C5 Cobb method		N	N	Y	Y
168	Rajshekhar	2007	Surgical Neurology	Y	India	Asia	Cohort	Pro	98	1994-2004	N	Y	N	Y	N	N	Y	Y	N	N	N		N	N	Followup duration	Y	N	Y	N	Y	N	N/A	N	N	N	N	N	N	N	N	N	N	N	N		N	N	Y
[truncated: 45 more columns]
